# Supplementary material
Source: publisher figshare collection journal article supplement (https://gsapubs.figshare.com/ndownloader/files/38721762)
Supplement: Supplementary file 1 [file 38721762]

## Sheet: Early Cretaceous mafic rocks
TABLE S2. MAJOR AND TRACE ELEMENT DATA OF THE EARLY CRETACEOUS POST-COLLISIONAL MAFIC ROCKS IN THE DABIE-SULU OROGENIC BELT AND ADJACENT AREAS
Data sources	Locality	Sample	SiO2	TiO2	Al2O3	TFe2O3	FeO	Fe2O3	MnO	MgO	CaO	Na2O	K2O	P2O5	LOI	SUM	Li	Be	Sc	V	Cr	Co	Ni	Cu	Zn	Ga	Rb	Sr	Y	Zr	Nb	Cs	Ba	La	Ce	Pr	Nd	Sm	Eu	Gd	Tb	Dy	Ho	Er	Tm	Yb	Lu	Hf	Ta
Cai et al. (2013)	Jiaobei terrain	09M09	56.46	0.64	12.59	5.58			0.15	6.86	5.92	2.32	4.6	0.61	3.82	99.55	34.8	2.1	12.8	82.8	384.3	19.3	127.7	4.9	123.8	15.7	164.7	896.1	16.7	232.5	8.3	6.4	2333.2	69	128.6	15.4	57	10.5	2.6	7.7	0.9	4.1	0.7	1.6	0.2	1.3	0.2	6.1	0.5
Cai et al. (2013)	Jiaobei terrain	09SZ06	45.97	0.92	13.16	8.09			0.12	9.47	7.67	2.2	2.62	0.44	8.82	99.48	15.2	1	21.9	147.2	529.7	35.5	182.8	31.7	70.9	14	37.2	991.5	17	149.2	8	0.5	1778.7	48.2	89.5	10.5	39	7.2	1.9	5.6	0.7	3.7	0.7	1.8	0.3	1.6	0.2	3.6	0.5
Cai et al. (2013)	Jiaobei terrain	09QX01	55.44	0.73	14.99	6.68			0.11	6.88	7.23	2.81	2.96	0.36	1.26	99.45	23.1	1.1	19.2	137.6	344.9	25.1	128.6	7.1	60.5	16.4	82.8	889.4	15.8	153.2	6.7	3.7	1953.3	30.9	64.9	8.9	37	7.7	2.1	5.6	0.7	3.5	0.6	1.6	0.2	1.5	0.2	3.9	0.4
Cai et al. (2013)	Jiaobei terrain	09M01	49.54	0.73	13.72	7.27			0.12	8.33	8.42	2.18	1.75	0.18	7.33	99.57	17.7	0.8	24.4	137.8	539.9	33	178.8	10.4	90.8	15.6	37.9	692.4	12.9	131.4	4.7	1.3	1034.3	31.5	57.5	6.9	24.7	4.5	1.2	3.7	0.5	2.7	0.5	1.4	0.2	1.3	0.2	3.3	0.3
Cai et al. (2013)	Jiaobei terrain	09DZ63	48.67	0.81	13.62	8.36			0.13	9.89	8.7	2.26	1.24	0.22	5.86	99.76	15.8	0.8	26.3	160.5	747.3	39.3	193.5	94.9	114.4	14.8	22.3	633.4	15.8	124.7	4.9	1.2	1388.4	33.5	62.6	7.6	27.4	5	1.4	4.2	0.6	3.3	0.7	1.8	0.3	1.6	0.2	3.2	0.3
Cai et al. (2013)	Jiaobei terrain	09M06	48.89	0.79	13.38	7.32			0.12	8.25	7.41	3.9	2.11	0.28	7.63	100.08	15.8	1	21.6	127.6	476.4	32.1	163.6	93.3	93	15.6	40.6	800.3	15.2	150.4	6.3	1.4	1218.8	50.4	92.9	10.9	38.4	6.5	1.6	4.9	0.6	3.3	0.6	1.6	0.2	1.5	0.2	3.8	0.4
Cai et al. (2015)	Jiaobei terrain	09RS115	51.3	0.8	14.5	6.4			0.1	6.2	6	2.3	3.8	0.4	7.6	99.4	18.6	1.4	15	112	369	25.1	125	35.3	75.6	17.7	91.4	2800	15.2	222	9.3	4.6	4481	56.1	103	11.8	40.3	7.1	1.8	5.1	0.7	3.2	0.6	1.5	0.2	1.4	0.2	5.3	0.5
Cai et al. (2015)	Jiaobei terrain	09RS99	48.5	0.9	14.2	7.1			0.1	6.8	6.8	2.4	3.6	0.4	8.6	99.4	16.2	1.6	18.6	130	351	27	307	38.2	74.3	15.8	77.6	907	17.5	199	11.1	2.5	2373	47.5	90	10.5	37.8	6.8	1.8	5.5	0.7	3.7	0.7	1.9	0.3	1.8	0.3	5.1	0.7
Cai et al. (2015)	Jiaobei terrain	09RS183	51.8	0.9	14.6	7.7			0.1	7.4	8.1	2.2	3.2	0.3	3.2	99.6	16.4	1	18.3	119	422	28.7	135	34.6	81.9	14.7	86.5	666	15.2	156	6.3	2.1	3523	40.6	76	9.3	33.6	6.2	1.7	4.9	0.6	3.3	0.6	1.6	0.2	1.5	0.2	3.9	0.4
Cai et al. (2015)	Jiaobei terrain	09RS110	51.1	0.9	14.5	7.2			0.1	6.3	6.6	3.2	3.4	0.7	5.5	99.5	14.8	1.6	16.9	114	327	23	73	14.7	86.7	16.9	72.2	1177	17.2	216	13.7	2	1985	68.3	128	14.9	52.6	8.8	2.2	6.1	0.8	3.7	0.7	1.7	0.3	1.5	0.2	5.2	0.8
Cai et al. (2015)	Jiaobei terrain	09RS63	46.2	1.1	15.4	7.9			0.1	7.6	8.7	3.2	3.3	0.6	5.6	99.7	11	1.4	23.3	161	256	28.9	113	33.9	86.9	16.2	74.5	1077	20.6	190	11	3.6	2128	57.8	109	13.2	47.7	8.6	2.2	6.6	0.9	4.4	0.8	2.2	0.3	2	0.3	4.6	0.6
Cai et al. (2015)	Jiaobei terrain	09RS29	50.4	1.3	15.4	8.5			0.1	7.1	7.6	3.3	3.4	0.8	1.6	99.5	20.8	1.5	23.2	171	224	26.4	59	13	92.1	17.1	84.2	1288	19.5	222	11.8	3.3	2847	58.5	114	14.2	52.3	9.3	2.4	7.1	0.9	4.3	0.8	1.9	0.3	1.6	0.2	5.4	0.6
Cai et al. (2015)	Jiaobei terrain	09RS64	48.5	0.9	15.1	7.2			0.1	6.3	6.9	3.2	2.7	0.5	8	99.4	16.3	1.1	14.9	120	252	24	114	13.5	129	16.3	50.9	1670	15.4	174	9.2	2.4	1614	47.6	88	10.3	37.3	6.6	1.7	5	0.6	3.3	0.6	1.6	0.2	1.5	0.2	4.2	0.5
Dai et al. (2011)	Dabie-Sulu	09DSC05	46.4738	1.44875	10.193			13.9287	0.247322	13.2043	10.8346	1.62467	1.74885	0.186268		99.8903			38.5757	238.51	814.762	55.5985	258.032		152.937		41.2423	148.918	38.182	90.2497	13.692		554.498	45.2744	122.374	16.6361	68.0357	12.8145	3.28293	10.074	1.38487	7.37547	1.30098	3.50796	0.476649	2.98056	0.446782	3.15308	0.549769
Dai et al. (2011)	Dabie-Sulu	09DSC04	47.6225	1.07029	8.62463			13.2799	0.248348	15.0983	11.2744	1.26772	1.29889	0.181845		99.9667			36.7904	196.005	940.028	67.2765	331.419		136.513		28.7222	81.7693	30.7138	91.3991	9.30309		292.932	34.3721	93.121	12.5186	51.2448	9.86438	2.61675	7.94274	1.1249	5.92459	1.07652	2.80639	0.400381	2.39799	0.35544	3.04824	0.391544
Dai et al. (2011)	Dabie-Sulu	09DB93	46.7316	1.5539	9.94911			14.1936	0.219006	13.4636	10.481	1.60604	1.51218	0.255506		99.9656			38.8355	249.507	846.054	75.7863	310.394		129.285		35.0027	165.973	33.922	76.0042	10.9748		571.985	35.6206	96.351	13.6566	57.2299	11.1526	2.89072	9.00556	1.23314	6.48412	1.14048	2.94327	0.415482	2.48924	0.370715	2.87534	0.434026
Dai et al. (2011)	Dabie-Sulu	09ZJP06	46.8629	1.03837	10.971			14.8308	0.222357	11.2542	11.7367	1.31107	1.14325	0.273751		99.6444			46.2354	301.538	311.601	60.4292	90.065		104.361		43.8314	821.468	21.2308	42.639	1.61476		260.356	9.44925	25.3595	3.9102	19.3775	4.96637	1.27062	4.83003	0.733706	4.20962	0.772824	2.07024	0.278557	1.78118	0.253919	1.42871	0.10327
Dai et al. (2011)	Dabie-Sulu	09DSC03	47.5832	1.08425	8.82891			12.4224	0.220981	15.5719	11.2143	1.41469	1.16686	0.226144		99.7336			36.6485	191.013	958.137	65.5963	348.963		117.658		22.6126	114.299	25.6033	75.1502	8.61643		342.288	40.6361	99.6146	12.5316	48.0974	8.71748	2.58469	6.92471	0.950535	4.90684	0.867571	2.32605	0.312475	2.00421	0.302958	2.72409	0.371124
Dai et al. (2011)	Dabie-Sulu	09DSC06	46.074	1.56042	9.91386			13.0971	0.214298	14.6055	11.4119	1.56042	1.09229	0.245506		99.7753			38.4165	245.282	886.821	61.8991	318.174		129.441		14.0928	158.82	29.5297	74.2588	10.436		406.837	30.2102	87.8903	12.3703	52.3555	10.0223	2.83389	8.06684	1.10239	5.73959	1.0337	2.67209	0.379	2.24444	0.340343	2.86801	0.411647
Dai et al. (2011)	Dabie-Sulu	09ZJP07	46.4047	1.87024	12.1617			11.9964	0.166358	12.3271	11.6038	2.06656	1.31227	0.0557972		99.9649			62.706	392.011	529.201	65.9968	145.223		77.3582		22.2725	426.856	37.8793	71.7035	6.35274		441.226	13.5959	39.4954	6.26381	31.8628	8.60089	2.3097	8.3121	1.27416	7.4368	1.31878	3.48534	0.487747	2.94997	0.403044	2.58961	0.317349
Dai et al. (2011)	Dabie-Sulu	09DSC02	47.2673	1.6785	10.8066			13.1897	0.220691	12.3919	10.817	2.23799	1.12936	0.1492		99.8881			45.8875	279.851	864.281	49.3225	257.736		121.876		12.904	364.164	34.5993	68.9508	11.236		402.665	43.456	108.23	15.028	64.4918	12.7515	3.38399	10.4848	1.40197	7.13867	1.2268	3.28001	0.416731	2.59049	0.38277	3.02514	0.510343
Dai et al. (2011)	Dabie-Sulu	09DB99	42.5554	1.74203	13.3452			15.2843	0.193905	10.1619	12.5053	1.91831	0.912494	0.557866		99.1767			52.9265	420.794	274.595	65.083	94.6863		104.249		14.6747	618.781	40.485	71.5888	7.05392		358.797	18.178	52.8589	8.4462	41.6248	10.0897	2.59725	9.65068	1.40704	7.9925	1.43402	3.90385	0.53889	3.26417	0.441453	2.7037	0.323737
Dai et al. (2011)	Dabie-Sulu	09DSC01	47.2718	1.72199	15.7365			12.3963	0.200207	7.26141	9.8029	3.22614	1.45228	0.76971		99.8392			31.4102	270.961	155.443	38.3412	72.6152		131.058		19.7008	1019.88	35.5935	83.1372	11.5719		1528.42	46.1603	118.313	16.9251	73.8373	14.4069	3.85042	11.3132	1.48439	7.57238	1.2511	3.18423	0.419548	2.49971	0.363745	2.67809	0.433573
Dai et al. (2011)	Dabie-Sulu	09ZJP05	45.0709	1.49012	15.238			12.9824	0.165342	8.55285	11.1657	2.59239	0.887945	0.546035		98.6916			40.0264	313.073	179.199	54.3782	74.8708		87.2022		16.4297	789.823	28.729	45.8183	4.52418		372.591	14.1355	39.196	6.3914	31.3441	7.37412	2.0293	7.1132	1.02848	5.7787	1.07226	2.82331	0.377116	2.26758	0.332228	1.68261	0.197872
Dai et al. (2011)	Dabie-Sulu	09ZJP08	51.2383	0.470357	5.74654			10.8898	0.228021	14.6629	14.9594	0.818013	0.214728	0.0429457		99.2709			60.4886	197.112	499.929	66.9542	193.903		77.3579		2.26269	220.175	23.3372	45.5895	0.910995		131.166	7.84234	22.006	3.40968	17.4248	4.56265	1.19776	4.33919	0.733695	4.43966	0.831714	2.37333	0.344333	2.19094	0.329694	1.69739	0.0509269
Dai et al. (2011)	Dabie-Sulu	09DB98	46.6979	0.954904	16.0383			13.5227	0.205356	7.59816	10.9455	2.40266	0.46205	0.833744		99.6612			30.1956	291.805	129.97	42.3747	44.5933		106.648		6.01545	908.471	22.9397	35.3524	2.00588		315.884	16.3912	39.8028	5.76586	27.2341	6.15962	1.79097	5.69726	0.82108	4.69854	0.856888	2.21927	0.297155	1.84345	0.267758	1.16111	0.100875
Deng et al. (2017)	Dabie-Sulu	WDSC-2-3	50.99	0.76	14.19	7.6	4.47	2.64	0.12	8.66	6.72	2.1	3.82	0.56	4.73	99.76				144.7	268.8	31.45	127.9				0.33	977.2	20.86	190.9	10.72		94.2	36.66	119.11	12.52	50.28	8.37	2.29	6.27	0.83	4.08	0.72	2.02		0.29	1.94	4.32	0.56
Deng et al. (2017)	Dabie-Sulu	WDSC-2-2	50.75	0.79	13.89	7.7	4.51	2.69	0.12	8.86	6.96	2.17	3.51	0.59	4.98	99.83				150.3	280	30.85	124.2				0.32	1003.2	20.72	192.2	10.54		89.1	44.83	110.48	13.53	52.03	8.44	2.33	6.24	0.82	3.98	0.71	1.98		0.29	1.89	4.33	0.54
Deng et al. (2017)	Dabie-Sulu	WDSC-3-3	51.79	0.86	12.27	7.14	4.07	2.63	0.14	7.66	8.52	1.77	2.7	0.44	6.93	99.77				159.6	273.6	29.44	63.7				0.24	5113.9	17.42	239.9	8.93		64.9	44.61	97.09	11.73	46.63	8.26	2.31	6.26	0.79	3.72	0.59	1.65		0.22	1.39	5.71	0.47
Deng et al. (2017)	Dabie-Sulu	WDSC-3-1	52	0.83	12.28	7.17	4.39	2.29	0.12	8.21	8.42	1.77	2.54	0.44	6.49	99.78				161	279.5	29.96	66.11				0.26	4054.4	18.39	228.3	8.99		55	48.46	102.63	12.39	48.83	8.69	2.44	6.58	0.84	3.92	0.63	1.72		0.23	1.53	5.02	0.48
Deng et al. (2017)	Dabie-Sulu	WDSC-3-4	52.11	0.84	12.42	7.13	4.34	2.3	0.12	7.93	8.19	1.82	2.49	0.44	6.81	99.82				157.3	260.9	28.76	60.51				0.26	2184.3	18.69	211.8	8.79		53.3	46.9	102.5	12.39	49	8.71	2.43	6.74	0.85	3.94	0.64	1.74		0.24	1.53	4.98	0.48
Deng et al. (2017)	Dabie-Sulu	LYGC-2-1	50.67	0.83	12.78	7.96	4.5	2.96	0.11	11.51	6.89	2.58	2.42	0.52	3.99	99.77				165.5	417.4	40.01	214.6				54.3	897.7	21.06	178.7	8.41		2323.6	53.17	123.94	14.94	56.82	9.08	2.49	6.81	0.87	4.16	0.72	2.05		1.88	0.3	4.33	0.42
Deng et al. (2017)	Dabie-Sulu	LYGC-2-3	49.02	0.8	12.63	7.86	4.48	2.88	0.1	11.09	7.68	2.71	2.43	0.47	5.51	99.81				161.4	390.9	35.6	189.4				52.2	763.2	19.07	176.2	8.3		2644.1	46.83	119.9	13.85	53.48	8.44	2.24	6.41	0.82	3.86	0.67	1.84		1.7	0.29	3.93	0.41
Deng et al. (2017)	Dabie-Sulu	LYGC-1-5	52.46	0.75	13.42	7.12	4.5	2.12	0.09	9.55	5.41	2.9	2.55	0.48	5.55	99.77				150.8	301.5	28.96	115				57.9	883.6	18.22	188.5	9.48		1775.2	57.88	130.57	14.92	54.99	8.28	2.31	6.19	0.78	3.67	0.64	1.77		1.59	0.26	4.54	0.51
Deng et al. (2017)	Dabie-Sulu	LYGC-1-2	53.54	0.75	13.67	7.05	4.46	2.09	0.08	9.43	4.68	3.04	2.57	0.47	4.97	99.76				153.5	300.7	28.64	111.8				55.2	1177.4	18.11	181.6	9.51		2113.4	56.72	124.3	14.16	52.31	8.12	2.15	5.98	0.75	3.59	0.64	1.77		1.65	0.28	4.22	0.5
Deng et al. (2017)	Dabie-Sulu	MPYL-1-1	51.95	0.68	11.7	7.01	3.99	2.57	0.09	10.03	7.28	2.3	1.88	0.25	7.07	99.8				165.3	496.5	33.99	156.8				54.3	1231.3	13.99	149	5.69		1740.1	36.04	76.49	9.09	34.07	5.41	1.51	4.11	0.55	2.79	0.49	1.4		1.27	0.22	4.06	0.32
Deng et al. (2017)	Dabie-Sulu	MPYL-2-3	52.78	0.64	13.05	6.26	4.15	1.65	0.09	8.49	6.77	2.58	2.1	0.23	7.31	99.85				152	352.2	27.95	96.26				60	830.5	13.88	143.6	5.51		1637	32.17	68.83	8.03	30.04	4.8	1.39	3.89	0.54	2.7	0.5	1.42		1.3	0.22	3.26	0.32
Deng et al. (2017)	Dabie-Sulu	MPWGZ-1-3	51.48	0.76	12.56	7.51	5.3	1.62	0.11	11.6	6.63	2.16	1.75	0.27	5.53	99.76				168.3	556.6	37.91	227.4				60.4	1925.1	17.26	156.3	5.51		1449.4	30.45	64.46	7.68	29.59	5.01	1.55	4.2	0.62	3.27	0.61	1.72		1.68	0.27	3.89	0.31
Deng et al. (2017)	Dabie-Sulu	MPYL-1-3	51.98	0.71	12.08	6.88	4.19	2.22	0.09	9.45	7.23	2.35	1.89	0.28	7.29	99.77				160.2	442	32.74	139.4				57.3	1263.9	13.54	151.5	5.86		1722.3	35.55	74.88	8.84	32.72	5.14	1.47	4	0.54	2.71	0.48	1.36		1.23	0.2	3.68	0.34
Deng et al. (2017)	Dabie-Sulu	MPWGZ-1-1	50.24	0.76	11.99	7.58	5.73	1.21	0.13	12	7.15	1.95	1.49	0.26	6.87	99.78				168.6	583.8	42.27	249.1				52.7	1433	17.6	144	5.51		1347.3	30.39	64.92	7.81	29.98	5.1	1.48	4.29	0.63	3.32	0.63	1.72		1.66	0.27	3.51	0.31
Deng et al. (2017)	Dabie-Sulu	MPYL-1-2	52.17	0.71	12.19	6.91	4.23	2.21	0.09	9.27	7.19	2.49	1.87	0.27	7.08	99.77				160.9	441	30.91	127.4				60.1	1340	14.08	155.1	5.75		1681.6	38.05	80.03	9.26	34.47	5.45	1.53	4.2	0.56	2.79	0.5	1.42		1.29	0.21	4.04	0.31
Deng et al. (2017)	Dabie-Sulu	MPWGZ-1-5	50.86	0.77	12.15	7.5	5.28	1.63	0.13	11.63	7.08	2.14	1.55	0.26	6.34	99.83				171.1	557.1	40.76	237.9				54.8	1445.7	16.91	146.1	5.7		1541.6	29.64	62.46	7.49	28.21	4.89	1.45	4.07	0.6	3.24	0.6	1.71		1.6	0.26	3.67	0.32
Deng et al. (2017)	Dabie-Sulu	MPYL-2-2	52.43	0.64	12.38	6.47	4.31	1.68	0.09	9.5	6.79	2.43	1.75	0.21	7.56	99.77				148.8	421.1	28.88	114				50.9	708.1	13.5	135.3	4.93		1503.5	32.14	67.45	7.79	29.4	4.72	1.34	3.79	0.52	2.7	0.48	1.35		1.27	0.21	3.33	0.29
Deng et al. (2017)	Dabie-Sulu	MPYL-2-1	52.39	0.64	12.41	6.44	4.19	1.78	0.09	9.51	6.71	2.5	1.72	0.21	7.67	99.81				157.5	393.4	29.11	112.2				50.9	780.9	13.52	139.2	5.03		1399.8	33.22	68.36	7.91	29.21	4.77	1.32	3.8	0.52	2.69	0.48	1.36		1.31	0.22	3.38	0.3
Deng et al. (2017)	Dabie-Sulu	LYGC-1-1	52.83	0.73	13.11	6.92	4.05	2.42	0.08	8.67	6.06	3.31	2.09	0.4	6.04	99.78				143.8	294.9	28.87	109.9				44.1	727.2	17.9	166.7	9.31		1814.4	56.02	123.76	14.14	51.66	7.84	2.16	6.01	0.75	3.51	0.61	1.74		1.54	0.26	3.95	0.49
Deng et al. (2017)	Dabie-Sulu	WDSC-1-2	50.66	0.89	13.38	7.11	4.31	2.32	8.44	8.57	2.33	2.02	0.57	6.18	99.79	67.92				154.1	304	30.41	125.3				54.8	1470.9	19.29	196	8.94		1939.1	114.74	13.6	51.09	8.11	2.32	6.24	0.82	3.87	0.67	1.87	0.26		1.72	0.29	4.43	0.46
Deng et al. (2017)	Dabie-Sulu	WDSC-1-1	50.58	0.9	13.31	7.03	3.96	2.64	8.1	8.55	2.35	1.97	0.55	6.79	99.79	67.25				156.9	287	32.82	134.9				50.4	1336.9	18.71	187.2	9.85		2017.2	113.07	13.22	50.09	7.91	2.17	6.12	0.79	3.86	0.65	1.82	0.26		1.7	0.28	4.29	0.49
Deng et al. (2017)	Dabie-Sulu	WDSC-1-5	50.73	0.86	13.34	7.1	3.97	2.69	8.83	8.37	2.3	2.07	0.57	5.93	99.76	68.91				152	314.8	33.13	140.7				55	1298.8	18.86	191.5	9.44		1785.8	108.76	12.75	48.29	7.83	2.3	5.9	0.78	3.79	0.66	1.85	0.26		1.7	0.28	4.49	0.49
Deng et al. (2017)	Dabie-Sulu	RSXC-1-2	49.89	1.07	16.03	8.58	4.4	3.69	6.52	7.27	3.28	2.53	0.64	4.33	99.79	57.52				165.8	16	28.21	12				49.4	1414.6	22.83	207.4	9.57		2590.8	126.92	15.35	58.34	9.23	2.66	7.05	0.92	4.51	0.79	2.24	0.32		2.03	0.34	4.51	0.48
Deng et al. (2017)	Dabie-Sulu	RSXC-1-4	48.19	1.03	15.76	8.68	5.03	3.09	6.56	7.47	2.89	2.49	0.61	6.49	99.76	57.4				173.9	23.8	30.69	13.63				57.3	1285.5	17.93	187.3	8.72		2410.5	116.45	14.09	53.82	8.44	2.48	6.43	0.81	3.72	0.63	1.67	0.22		1.45	0.23	4.11	0.45
Deng et al. (2017)	Dabie-Sulu	RSXC-1-1	48.88	1.03	15.66	8.46	4.43	3.54	6.52	6.91	2.79	2.71	0.59	6.59	99.8	57.86				160.7	22.8	27.64	12.4				63.8	1176.1	20.77	207.5	9.41		2537.2	127.61	15.47	59.34	9.44	2.65	7.06	0.91	4.33	0.74	2.04	0.27		1.81	0.29	4.42	0.49
Deng et al. (2017)	Dabie-Sulu	RSXC-3-2	49.7	0.84	13.38	7.53	4.57	2.45	8.91	7.62	2.64	2.56	0.51	6.54	99.82	67.85				153	375.1	31.43	134.6				65	809.1	16.78	184.6	9.78		2101.3	80.93	9.92	38.44	6.46	1.97	5.1	0.67	3.4	0.59	1.64	0.23		1.41	0.23	4.61	0.54
Deng et al. (2017)	Dabie-Sulu	LYGC-2-4	49.09	0.81	12.57	7.74	4.41	2.84	11.77	7.62	2.41	2.51	0.5	5.18	99.84	73.05				170.9	396.8	36.52	185.8				58.3	820	19.81	176.4	8.35		2862.1	123.8	14.46	55.67	8.64	2.44	6.62	0.86	3.98	0.68	1.96	0.27		1.76	0.3	4.26	0.42
Deng et al. (2017)	Dabie-Sulu	RSXC-2-5	49.8	0.82	13.74	7.53	4.61	2.4	9.84	7.34	2.52	2.18	0.43	5.97	99.77	69.98				161.1	369.9	32.1	136.8				56.4	943.4	16.47	166.2	8.08		1727.8	68.39	8.38	33.11	5.77	1.78	4.7	0.66	3.37	0.6	1.6	0.22		1.37	0.24	4.35	0.44
Deng et al. (2017)	Dabie-Sulu	RSXC-3-1	49.67	0.84	13.56	7.51	4.8	2.18	9.17	7.45	2.57	2.58	0.5	6.36	99.79	68.51				153.8	352.9	32.69	150.1				65.3	805.6	16.52	186	9.87		2017.8	80.28	9.78	37.87	6.29	1.92	4.95	0.67	3.31	0.57	1.62	0.23		1.45	0.22	4.67	0.55
Deng et al. (2017)	Dabie-Sulu	RSXC-2-1	50.11	0.83	13.82	7.58	4.53	2.54	9.64	7.21	2.49	2.25	0.43	5.84	99.82	69.4				163	368.8	34.45	147				58.6	1924.9	16.68	176.1	8.42		1576.5	70.58	8.67	33.81	5.77	1.78	4.68	0.67	3.4	0.59	1.62	0.23		1.45	0.23	4.59	0.48
Deng et al. (2017)	Dabie-Sulu	RSXC-3-4	50.44	0.85	14.16	7.39	4.5	2.39	8.94	6.7	2.59	2.67	0.51	5.91	99.76	68.31				155.7	270.6	31.77	117.1				70.4	1540.9	15.64	192	10		1888.2	78.66	9.36	36.04	5.83	1.82	4.8	0.65	3.19	0.56	1.51	0.21		1.34	0.23	4.75	0.55
Deng et al. (2017)	Dabie-Sulu	WDSC-2-1	50.65	0.8	14.05	7.79	4.58	2.7	8.73	6.7	2.56	3.08	0.58	5.29	99.84	66.65				154.3	241.2	31.02	123				79.3	998.1	19.72	188.6	10.77		2736.1	114.48	12.96	49.89	7.95	2.22	6.02	0.79	3.77	0.66	1.84	0.26		1.67	0.28	4.05	0.57
Deng et al. (2017)	Dabie-Sulu	RSXC-2-2	50.31	0.83	14.88	7.23	4.71	2	8.38	6.35	2.94	2.89	0.47	6	99.85	67.38				153	220.7	28.48	96.34				74.3	889.5	14.85	183.1	9.02		1763	70.92	8.71	33.64	5.57	1.82	4.56	0.63	3.06	0.52	1.41	0.2		1.25	0.2	4.71	0.5
Deng et al. (2017)	Jiaobei terrain	PDCZ-2-2	46.44	1.18	11.61	9.41	6.91	1.73	0.11	13.43	7.67	1.79	3.44	0.74	4.71	99.75				205.9	657.3	46.66	256.3				87.9	807.7	19.97	189.9	16.27		1841	34.62	84.77	10.7	43.07	8.1	2.42	6.65	0.9	4.47	0.72	1.77	0.24	1.31	0.19	4.66	0.95
Deng et al. (2017)	Jiaobei terrain	ZYLL-5-3	49.23	0.79	11.68	7.43	5.53	1.29	0.17	10.65	8.78	1.09	2	0.33	8.31	99.84				172.3	457.2	34.26	157				79	812.6	16.92	152.2	6.02		1292	55.11	114.82	13.12	48.48	7.54	2.09	5.76	0.74	3.44	0.6	1.71	0.24	1.56	0.26	3.56	0.32
Deng et al. (2017)	Jiaobei terrain	LZYD-1-10	49.96	0.86	12.39	7.79	5.03	2.2	0.13	8.97	8.67	1.99	3.48	0.95	5.2	99.84				176.5	378.1	28.67	118.3				92.7	1285.8	24.81	274.5	11.01		3389	54.65	132.21	16.38	65.25	11.7	3.39	9.42	1.22	5.57	0.9	2.23	0.29	1.76	0.29	6.41	0.49
Deng et al. (2017)	Jiaobei terrain	ZYJL-1-1	47.1	0.89	11.78	7.44	4.5	2.45	0.1	10.89	7.84	1.5	2.61	0.42	9.74	99.81				167.9	499.3	38.38	219.9				77.8	712.2	18.75	169	7.72		1781	48.83	110.21	12.98	49.23	7.82	2.17	6.08	0.8	3.77	0.67	1.83	0.26	1.59	0.27	4.04	0.42
Deng et al. (2017)	Jiaobei terrain	ZYLL-5-1	48.29	0.79	11.44	7.41	5.59	1.2	0.18	11.06	9.28	1	1.74	0.31	8.94	99.82				173.4	477	34.38	160.8				64.7	813.2	17.36	148	5.79		1248	54.68	116.07	13.45	50.18	7.78	2.12	5.87	0.74	3.55	0.64	1.76	0.24	1.6	0.27	3.5	0.31
Deng et al. (2017)	Jiaobei terrain	LZYD-4-1	53.34	0.99	13.51	6.64	3.78	2.44	0.1	7.1	7	2.51	3.83	0.64	4.53	99.78				143.3	196.2	24.63	75.64				130.4	1125.9	18.83	237.3	21.49		3652	49.57	123.93	14.57	55.78	8.82	2.32	6.66	0.84	3.93	0.68	1.8	0.25	1.56	0.25	5.54	1.26
Deng et al. (2017)	Jiaobei terrain	LZYD-1-9	50.22	0.85	12.65	7.72	4.93	2.24	0.13	9	8.24	2.01	3.05	0.92	5.54	99.79				171.3	378	31.98	114.5				84.4	1227.9	26.31	292.5	11.26		3300	54.83	135.24	16.87	67.58	12.15	3.46	9.66	1.3	5.73	0.91	2.31	0.3	1.86	0.28	6.78	0.5
Deng et al. (2017)	Jiaobei terrain	LZYD-1-8	49.28	0.87	12.41	7.73	5.26	1.88	0.12	9.03	8.65	1.86	2.79	0.91	6.76	99.82				174.3	385.7	30.06	116.2				72.9	1308.7	25.15	284.8	11.3		3355	57.01	141.33	17.16	68.84	12.18	3.45	9.67	1.25	5.66	0.88	2.2	0.28	1.79	0.28	6.27	0.5
Deng et al. (2017)	Jiaobei terrain	ZYJL-1-2	47.8	0.86	11.54	7.66	4.36	2.81	0.1	11.15	7.74	1.67	2.47	0.42	8.87	99.79				170.1	525.9	39.71	232.2				73.8	772.2	16.03	167.5	7.25		1695	39.83	89.03	10.7	40.65	6.51	1.85	5.07	0.67	3.24	0.57	1.54	0.22	1.37	0.23	3.94	0.4
Deng et al. (2017)	Jiaobei terrain	LZYD-4-2	52.8	1.12	13.46	7.23	4.56	2.16	0.11	8.4	6.84	2.39	3.51	0.68	3.72	99.76				151.4	245.1	28.32	92.64				105.8	1166.7	19.56	245.7	23.16		4040	44.9	116.29	14.44	54.92	8.83	2.39	6.67	0.86	4.07	0.69	1.89	0.25	1.65	0.28	5.66	1.36
Deng et al. (2017)	Jiaobei terrain	ZYLL-7-3	49.9	0.79	10.78	7.47	4.61	2.36	0.1	12.74	8.6	1.7	2.46	0.35	5.38	99.76				183.5	557.9	38.04	210.1				74.2	1044.9	18.45	174	7.12		1789	56.93	122.97	14.29	52.97	8.36	2.16	6.28	0.79	3.78	0.65	1.82	0.25	1.63	0.27	4.11	0.36
Deng et al. (2017)	Jiaobei terrain	LKXDJ-10-2	46.6	0.85	11.39	8.17	4.34	3.35	0.11	11.39	8.51	2.09	2.9	0.66	7.56	99.75				182.4	469.6	39.21	176				79.4	1227.5	23.88	218.2	10.03		2481	100.94	219.56	24.8	92.74	13.92	3.46	9.96	1.17	5.13	0.83	2.27	0.3	1.95	0.32	5.05	0.49
Deng et al. (2017)	Jiaobei terrain	LKXDJ-10-1	46.52	0.88	11.27	8.05	4.74	2.78	0.12	11.32	8.9	2.04	2.79	0.7	7.68	99.75				187	494.1	40.57	174.3				65.1	1372.1	23.9	221.8	10.82		2648	101.61	222.81	25.31	93.9	13.94	3.53	10.11	1.18	5.03	0.84	2.29	0.3	1.93	0.32	5.09	0.54
Deng et al. (2017)	Jiaobei terrain	ZYLL-7-1	50.44	0.76	11.11	7.39	4.68	2.19	0.1	12.38	8.38	1.79	2.41	0.37	5.14	99.76				173.3	547.5	39.54	222.8				72.9	1024.4	17.58	172.9	7.12		1781	53.58	115.82	13.68	51.02	8.11	2.09	6.08	0.76	3.62	0.63	1.73	0.24	1.5	0.26	4.1	0.39
Deng et al. (2017)	Jiaobei terrain	ZYLL-7-2	50.06	0.77	10.74	7.53	5.17	1.79	0.11	12.66	8.8	1.68	2.22	0.34	5.44	99.77				177.5	568.3	38.87	222.3				66.7	1038.4	17.35	172.2	7.02		1648	53.11	114.73	13.38	49.82	7.83	2.14	5.76	0.74	3.45	0.62	1.73	0.24	1.5	0.26	4.12	0.37
Deng et al. (2017)	Jiaobei terrain	LZYD-1-6	49.71	0.9	12.96	7.91	4.99	2.37	0.12	8.89	8.24	2.08	2.58	0.95	6.01	99.78				177.9	382.2	35.2	112.3				68.3	1206.1	27.43	294.4	11.82		2781	66.9	154.17	18.94	74.35	13.19	3.74	10.71	1.36	6	0.96	2.48	0.31	1.9	0.31	6.55	0.52
Deng et al. (2017)	Jiaobei terrain	LXHL-1-3	48.71	1.39	14.59	9.41	6.05	2.69	0.16	6.54	8.29	2.59	3.13	0.78	4.89	99.82				151.4	154.4	25.81	49.92				73.6	1103.8	25.1	230.7	19.34		2351	51.84	127.43	15.57	60.67	9.9	2.62	7.61	1.03	4.99	0.88	2.44	0.34	2.2	0.36	5.4	1.11
Deng et al. (2017)	Jiaobei terrain	LXHL-1-2	48.43	1.4	14.7	9.29	6.03	2.58	0.16	7	8.16	2.58	3.05	0.81	4.89	99.8				148.4	150.3	25.3	45.61				73	1113.7	23.77	234.8	19.23		2205	52.86	127.81	15.84	61.65	9.78	2.61	7.42	0.98	4.78	0.82	2.26	0.32	2.04	0.33	5.49	1.09
Deng et al. (2017)	Jiaobei terrain	LKXDJ-3-4	47.31	0.8	9.48	7.43	4.42	2.52	0.08	14.52	8.96	1.56	1.84	0.49	7.83	99.83				183.4	838.4	42.77	186.2				43.9	1031.1	20.49	153.4	7.04		2022	79.11	168.54	18.87	70.09	10.53	2.66	7.81	0.94	4.17	0.72	1.97	0.27	1.71	0.29	3.51	0.35
Deng et al. (2017)	Jiaobei terrain	LZYD-1-7	50.35	0.84	12.72	7.57	5.05	1.96	0.11	8.61	8.05	2.18	2.56	0.88	6.45	99.76				166.4	349.2	32.22	105.7				65.7	1070.1	25.99	280.6	10.9		2859	57.6	137.61	16.94	67.34	12.12	3.4	9.71	1.26	5.77	0.91	2.28	0.29	1.81	0.29	6.33	0.49
Deng et al. (2017)	Jiaobei terrain	LXHL-1-1	48.36	1.37	14.68	9.25	5.97	2.61	0.17	6.98	8.19	2.66	3.05	0.82	4.89	99.76				151.2	153.9	27.06	50.71				74.4	1071.9	23.88	238.3	20.63		2083	53.41	127.89	15.58	59.45	9.6	2.51	7.53	0.97	4.76	0.83	2.35	0.34	2.09	0.35	5.4	1.17
Deng et al. (2017)	Jiaobei terrain	LKXDJ-3-3	47.42	0.8	9.6	7.39	0.48	6.86	0.08	14.18	8.9	1.64	1.84	0.5	7.47	99.77				178.2	815.8	41.79	178.9				43.3	1026.6	20.97	156	7.09		1975	84.45	176.25	19.5	72.03	10.91	2.75	8.01	0.94	4.23	0.74	2.05	0.27	1.73	0.28	3.58	0.35
Deng et al. (2017)	Jiaobei terrain	LKXDJ-9-3	53.93	0.68	12.45	5.99	3.48	2.12	0.08	8.19	7.1	2.06	2.31	0.26	7.15	99.81				129.4	331.2	25.78	81.16				57.3	799.5	13.46	157.8	5.79		1751	36.33	78.2	9.17	34.29	5.44	1.53	4.26	0.56	2.75	0.47	1.34	0.18	1.21	0.2	3.7	0.33
Deng et al. (2017)	Jiaobei terrain	LKXDJ-3-1	47.67	0.79	9.71	7.44	4.27	2.7	0.08	14.06	8.73	1.71	1.88	0.47	7.69	99.77				178.6	816.4	42.55	187.7				44.4	1025.9	20.75	157.5	7.28		1961	85.81	175.41	19.31	71.47	10.62	2.75	7.54	0.93	4.2	0.71	1.96	0.26	1.72	0.28	3.49	0.34
Deng et al. (2017)	Jiaobei terrain	LKXDJ-9-1	54.93	0.7	12.75	5.92	3.43	2.11	0.07	7.62	7.06	2.27	2.42	0.26	6.18	99.8				127	294.7	26.97	81.01				52.9	742.6	13.12	150.3	6.44		1726	34.45	74.38	8.72	32.57	5.13	1.46	4	0.53	2.55	0.45	1.28	0.18	1.17	0.19	3.65	0.39
Deng et al. (2017)	Jiaobei terrain	LKXDJ-9-2	53.7	0.72	12.45	6.13	3.26	2.51	0.08	8.61	7.24	2.09	2.2	0.24	6.71	99.81				138.8	325.4	27.6	88.92				52.4	753.9	13.04	151.9	6.43		1782	35.28	76.22	8.97	33.26	5.19	1.47	4.09	0.53	2.62	0.47	1.33	0.18	1.18	0.19	3.72	0.38
Deng et al. (2017)	Jiaobei terrain	LKXDJ-6-1	54.53	0.73	12.7	7.3	4.35	2.47	0.1	9.84	6.8	2.54	2.16	0.41	3.14	99.76				147.5	506.5	32.31	136.9				52.7	983.5	18.55	188.6	8.13		1678	52.62	111.02	13.01	48.11	7.63	2.05	5.87	0.74	3.63	0.65	1.75	0.24	1.62	0.27	4.47	0.41
Deng et al. (2017)	Jiaobei terrain	LKXDJ-6-5	54.18	0.72	13.09	6.96	4.35	2.12	0.09	8.65	7.14	2.72	2.19	0.38	4.18	99.81				145.5	466.3	32.59	129.6				50.4	955.3	18.62	191.1	8.66		1727	56.75	118.84	13.55	50.01	7.78	2.08	5.93	0.76	3.64	0.63	1.8	0.25	1.63	0.27	4.5	0.45
Deng et al. (2017)	Jiaobei terrain	LKXDJ-6-4	53.36	0.73	12.59	7.38	4.45	2.43	0.1	10.16	7.23	2.46	1.97	0.4	3.95	99.83				146.8	544.7	33.85	140.9				49.2	940.2	18.51	184.6	8.09		1550	55.1	115.59	13.26	49.07	7.65	2.04	5.91	0.76	3.63	0.65	1.8	0.26	1.61	0.27	4.4	0.42
Deng et al. (2017)	Jiaobei terrain	LKXDJ-7-2	57.46	0.64	12.61	6.11	3.45	2.27	0.08	8	6.47	2.82	2.18	0.23	3.56	99.77				128.1	286.5	25.2	78.23				60.3	943.4	14.49	167.8	6.6		1366	42.34	86.88	9.82	35.5	5.58	1.55	4.34	0.57	2.78	0.52	1.44	0.2	1.32	0.22	4.04	0.38
Deng et al. (2017)	Jiaobei terrain	LKXDJ-7-1	56.32	0.62	12.83	5.98	3.49	2.1	0.08	7.7	6.6	2.81	2.13	0.23	4.91	99.83				129.3	293.1	25.59	78.8				62.7	961.8	13.62	169.2	6.53		1487	39.95	82.33	9.3	33.86	5.14	1.51	4.09	0.54	2.69	0.48	1.33	0.19	1.24	0.22	4.01	0.37
Deng et al. (2017)	Jiaobei terrain	ZYLL-2-2	50.65	0.72	12.21	7.08	4.08	2.54	0.08	9.61	7.28	2.35	1.75	0.25	8.26	99.82				156.2	512.6	34.26	151				31.5	712.5	13.89	138.7	6.71		1341	35.76	74	8.62	31.62	5.01	1.48	4.04	0.56	2.73	0.48	1.35	0.19	1.26	0.21	3.45	0.35
Deng et al. (2017)	Jiaobei terrain	LKXDJ-6-3	54.57	0.7	13.12	7.09	4.38	2.23	0.09	9.2	6.55	2.84	2.1	0.39	3.67	99.83				145.8	488.8	31.89	128.2				47.7	953.8	18.31	194.6	8.66		1657	55.64	116.78	13.36	49.37	7.49	2.03	5.81	0.76	3.58	0.63	1.79	0.25	1.63	0.27	4.23	0.45
Deng et al. (2017)	Jiaobei terrain	LKXDJ-7-3	57.93	0.63	13.09	6.03	3.32	2.33	0.09	7.47	6.3	2.99	2.15	0.23	3.3	99.83				123.9	269.2	25.28	79.35				61.4	944.6	14.67	171.7	6.95		1386	40.37	90.1	9.94	36.55	5.51	1.56	4.29	0.58	2.86	0.51	1.45	0.2	1.37	0.23	4.12	0.41
Deng et al. (2017)	Jiaobei terrain	ZYLL-2-1	50.94	0.72	12.18	7.12	4.24	2.4	0.08	9.73	7.27	2.41	1.72	0.26	7.83	99.79				156.3	530.1	36.72	167				31.1	695.7	14.39	135.4	7.13		1394	35.51	73.43	8.48	31.26	5.04	1.46	4.12	0.55	2.85	0.51	1.43	0.2	1.32	0.22	3.18	0.36
Deng et al. (2017)	Jiaobei terrain	ZYLL-2-3	51.03	0.72	12.12	7.03	4.12	2.46	0.08	9.5	7.34	2.35	1.67	0.25	8.17	99.8				159.1	532.7	34.1	153.8				28.9	681.2	14.34	131.9	6.66		1302	37.21	75.53	8.77	32.03	5.11	1.5	4.14	0.57	2.88	0.51	1.4	0.19	1.3	0.21	3.27	0.34
Fan et al. (2001)	Dabie-Sulu	97HX-4	45.24	1.16	13.98		1.64	5.88	0.12	6.48	9.11	3.09	1.54	0.47	10.48	99.19
Guo et al. (2004)	Dabie-Sulu	97RY-24	51.36	0.88	14.98		5.05	2.29	0.12	7.4	7.79	2.31	2.39	0.32	5.03	99.92			22	157	410	35	160				61.8	792	16.2	99.8	6.23		1454	38.22	71.5	8.09	29.46	5.28	1.94	4.53	0.63	2.92	0.57	1.58		1.22	0.19	2.44	0.31
Guo et al. (2004)	Dabie-Sulu	97RS-27	44.66	1.28	13.41		6.38	2.05	0.18	10.51	11.89	2.16	2.17	0.9	4.62	100.21			25	190	631	41	190				65.7	1101	22.9	161	11.6		3261	55.38	108.2	14.17	53.35	8.73	3.01	6.73	0.93	4.06	0.77	2.04		1.73	0.24	3.58	0.56
Guo et al. (2004)	Dabie-Sulu	97RY-4	50.28	0.97	14.84		4.96	2.37	0.14	7.02	8.05	2.63	2.57	0.47	4.18	98.48			23	158	411	32	155				70.1	925	21.5	170	9.36		1691	64.36	116.8	13.31	46.64	7.32	2.34	6.14	0.8	3.68	0.71	1.88		1.67	0.25	3.45	0.43
Guo et al. (2004)	Dabie-Sulu	97RY-25	49.94	0.99	13.98		5.15	2.33	0.13	9.14	8.44	2.13	2.07	0.29	5.47	100.06			25	167	546	41	216				69.7	706	18.1	117	4.56		1452	39.18	73.66	8.71	32.4	5.47	1.86	4.77	0.64	3	0.61	1.68		1.37	0.21	2.58	0.22
Guo et al. (2004)	Dabie-Sulu	97RY-6	53.42	0.85	15.13		5.46	0.91	0.16	7.68	7.01	2.87	2.58	0.38	3.11	99.56			22	140	515	29	157				54.5	1042	17.9	147	7.53		2638	51.72	95.16	10.97	39.01	6.34	2.3	5.09	0.68	3.12	0.61	1.64		1.47	0.2	3.19	0.37
Guo et al. (2004)	Dabie-Sulu	97RS-19	46.8	1.28	15.13		5.52	3.25	0.15	8.48	10.64	2.93	2.57	0.62	2.9	100.27			32	228	277	34	49				47.9	1310	23.8	130	6.89		2510	69.97	136.4	17.11	66.74	10.77	3.38	8.09	1.05	4.57	0.86	2.2		1.76	0.26	3.08	0.31
Guo et al. (2004)	Dabie-Sulu	97RY-13	52.94	0.99	15.27		5.08	1.07	0.14	7.73	6.62	3.25	2.72	0.45	3.88	100.14			19	137	487	30	169				65.8	847	19.8	166	9.65		2002	62.13	113.2	13.73	48.39	7.87	2.45	6.37	0.82	3.67	0.67	1.81		1.56	0.21	3.63	0.5
Guo et al. (2004)	Dabie-Sulu	97RS-7	47.94	1.05	15.83		5.89	1.42	0.13	8.92	8.05	3.09	2.11	0.52	3.9	98.85			24	161	473	37	215				39.5	902	20.9	180	12.4		1386	44.43	85.47	10.38	37.93	6.31	2.16	5.72	0.78	3.76	0.72	1.9		1.66	0.23	3.86	0.62
Guo et al. (2004)	Dabie-Sulu	97RS-26	48.64	1.16	16.41		5.86	1.46	0.13	7.16	9.47	3.23	1.95	0.54	4.1	100.11			21	170	295	32	130				35.5	912	20.6	137	11.6		1307	44.5	85.9	10.19	38.74	6.93	2.24	6.16	0.82	3.89	0.72	1.93		1.59	0.2	3.08	0.58
Guo et al. (2014)	Jiaobei terrain	09SD-103	46.23	0.97	13.06	7.78			0.13	9.3	7.84	2.41	3.59	0.5	7.88	99.67			20	150	518	33	188				92.4	1458	18.7	187	14		3278	76.2	137.1	15.9	57.9	8.86	2.17	7.21	0.85	3.67	0.71	1.99	0.27	1.66	0.24	4.42	0.73
Guo et al. (2014)	Jiaobei terrain	09SD-105	46.3	0.97	13.4	8.24			0.13	9.62	8.44	2.51	3.22	0.48	6.16	99.49			21	163	513	36	199				82.8	1240	19.8	188	13.8		2755	70.4	128.8	15.1	54.5	8.7	2.17	7.21	0.84	3.83	0.78	2.13	0.28	1.8	0.25	4.45	0.72
Guo et al. (2014)	Jiaobei terrain	09SD-90	53.48	0.75	14.13	6.85			0.13	8.21	6.53	2.34	2.86	0.44	3.94	99.65			17	132	484	29	165				60.7	850	14.5	149	10.3		3281	43.5	85.6	10.1	38.4	6.58	1.61	6.05	0.66	3.02	0.6	1.7	0.21	1.4	0.21	3.99	0.69
Guo et al. (2014)	Jiaobei terrain	09SD-82	48.52	0.91	13.72	8.11			0.13	10.02	8.66	2.23	2.38	0.46	4.59	99.72			22	168	526	39	210				47.5	996	20.2	157	9.3		1951	75.1	140.3	16.2	59.3	9.48	2.48	7.68	0.95	4.22	0.84	2.33	0.3	1.85	0.28	3.75	0.53
Guo et al. (2014)	Jiaobei terrain	09SD-85	48.42	0.91	13.5	8.19			0.12	10.36	8.59	2.16	2.28	0.46	4.73	99.73			22	166	515	38	206				42.1	971	19.1	151	8.9		1806	73.6	137.6	15.9	59.3	9.54	2.35	7.88	0.93	4.15	0.8	2.36	0.28	1.84	0.26	3.73	0.52
Guo et al. (2014)	Jiaobei terrain	09SD-84	48.35	0.92	13.89	8.14			0.13	9.79	8.5	2.25	2.31	0.47	5.01	99.75			22	170	508	37	193				43.7	998	19.5	155	9		1830	72.8	137	16	57.7	9.32	2.36	7.68	0.94	4.03	0.82	2.34	0.29	1.85	0.27	3.69	0.54
Guo et al. (2014)	Jiaobei terrain	09SD-80	48.43	0.9	13.34	8.31			0.13	10.84	8.64	2.2	2.22	0.45	4.21	99.68			23	170	575	41	233				42.1	939	19.9	154	8.9		2056	74.3	139.1	16.1	59.4	9.47	2.34	7.96	0.93	4.13	0.84	2.3	0.29	1.85	0.27	3.68	0.55
Guo et al. (2014)	Jiaobei terrain	09SD-96	53.54	0.72	14.63	7.26			0.14	8.14	6.57	2.52	2.49	0.37	3.24	99.61			19	141	520	27	134				53	913	16.4	153	8.3		2525	48.7	88.1	9.8	35.5	5.7	1.47	4.98	0.63	3.06	0.63	1.74	0.23	1.54	0.22	3.51	0.6
Guo et al. (2014)	Jiaobei terrain	09SD-81	48.71	0.93	13.95	8.07			0.13	9.51	8.6	2.41	2.34	0.47	4.61	99.72			22	168	471	37	183				45.2	985	20	159	9.4		2090	75.9	140.2	16.3	59.9	9.82	2.35	7.95	0.93	4.22	0.86	2.33	0.29	1.95	0.27	3.69	0.57
Guo et al. (2014)	Jiaobei terrain	09SD-86	48.49	0.93	13.81	8.21			0.13	10.01	8.34	2.39	2.25	0.47	4.71	99.72			21	166	493	39	204				40.2	954	19.8	159	9.1		1796	75.3	141.2	16.3	59.8	9.61	2.38	7.98	0.91	4.03	0.84	2.31	0.29	1.84	0.27	3.69	0.61
Guo et al. (2014)	Jiaobei terrain	09SD-94	52.72	0.7	14.19	7.43			0.15	8.62	7.09	2.35	2.12	0.35	3.95	99.68			20	140	594	31	170				49.1	840	16.2	155	8.3		1751	46.2	88	10	37.4	6.3	1.58	5.74	0.67	3.23	0.66	1.91	0.26	1.58	0.23	3.66	0.54
Guo et al. (2014)	Jiaobei terrain	09SD-76	48.85	0.8	14.06	7.77			0.12	9.5	7.68	2.22	1.94	0.29	6.69	99.92			20	153	544	35	152				45.8	783	16.7	134	6		1388	54	100	11.4	42.1	6.75	1.75	5.72	0.7	3.41	0.69	1.94	0.27	1.64	0.25	3.3	0.4
Guo et al. (2014)	Jiaobei terrain	09SD-78	48.94	0.78	14.08	7.73			0.12	9.4	7.64	2.28	1.99	0.29	6.66	99.9			20	154	546	36	153				46.1	815	16.6	136	6.1		1416	54.7	101.6	11.4	41	6.77	1.75	5.79	0.69	3.39	0.7	1.97	0.26	1.64	0.23	3.25	0.36
Guo et al. (2014)	Jiaobei terrain	09SD-91	53.09	0.74	15.05	6.86			0.13	6.65	7.42	3.03	2.03	0.38	4.34	99.71			21	142	400	28	89				48.9	918	17.8	159	8.7		2537	51.6	96.2	11.2	41.4	6.76	1.85	6.5	0.73	3.65	0.75	2.08	0.26	1.78	0.25	4.04	0.54
Guo et al. (2014)	Jiaobei terrain	09SD-98	52.65	0.86	15.56	7.57			0.12	7.27	6.73	3.1	1.86	0.34	3.59	99.64			18	143	363	31	144				36.7	1046	15.9	156	8.2		2369	44.5	80.1	9.1	33.9	5.57	1.49	5.15	0.61	3.1	0.6	1.75	0.22	1.43	0.21	3.86	0.49
Guo et al. (2014)	Luxi-EM2	09SD-165	49.57	1.13	14.5	8.77			0.13	8.73	8.36	2.4	2.86	0.96	2.16	99.57			16	155	369	34	130				59.2	1562	26.3	319	19.3		1622	136.5	273.7	30.2	109.4	16.06	3.79	11.85	1.39	5.53	0.98	2.73	0.32	2	0.3	6.8	1.09
Guo et al. (2014)	Luxi-EM2	09SD-167	49.57	1.12	14.46	8.83			0.13	8.94	8.37	2.37	2.79	0.93	2.06	99.58			17	153	355	34	118				59.3	1503	25.4	309	19		1572	131	262.6	28.8	105.7	15.4	3.72	11.63	1.33	5.36	0.97	2.76	0.32	1.98	0.27	6.39	1.1
Guo et al. (2014)	Luxi-EM2	09SD-169	49.38	1.13	14.34	8.78			0.13	8.8	8.54	2.92	1.68	0.95	2.97	99.62			18	153	370	34	125				17.8	1521	26.1	312	19.2		1593	133.8	269.8	29.8	109.5	16.21	3.86	11.74	1.38	5.53	1.01	2.74	0.31	2.02	0.3	6.64	1.12
Guo et al. (2014)	Luxi-EM2	09SD-178	49.28	1.15	14.47	8.7			0.12	7.9	8.51	3.36	1.65	0.96	3.55	99.64			18	153	357	33	122				13.2	1482	25.9	313	18.8		1552	135	273.8	29.8	107.1	15.99	3.81	11.95	1.39	5.46	0.98	2.85	0.32	2.02	0.29	6.76	1
Guo et al. (2014)	Luxi-EM2	09SD-177	47.49	1.13	12.51	8.93			0.13	11.92	9.41	2.61	0.96	0.77	3.81	99.67			20	161	540	41	228				13	1220	23.3	253	14.9		1413	113	226.8	25.3	92.9	14.06	3.38	10.02	1.24	5.02	0.89	2.47	0.27	1.75	0.25	5.38	0.85
Guo et al. (2014)	Luxi-EM2	09SD-183	47.87	1.13	12.89	8.86			0.13	11.2	9.25	2.83	1.03	0.79	3.7	99.68			20	160	509	39	214				14	1225	23.7	253	15.1		1380	114.6	229.4	25.8	95.1	14.17	3.36	10.81	1.25	4.98	0.92	2.54	0.27	1.78	0.26	5.44	0.97
Guo et al. (2014)	Luxi-EM2	09SD-185	47.36	1.13	12.68	8.91			0.14	11.7	9.33	2.64	0.95	0.8	4.04	99.68			20	164	541	40	222				13.1	1243	23.9	257	15.2		1389	116	232.5	26.4	96.5	14.36	3.39	10.63	1.25	4.94	0.9	2.39	0.29	1.79	0.26	5.54	0.88
Guo et al. (2014)	Luxi-EM2	09SD-172	48.02	1.12	12.25	8.52			0.12	11.19	10.43	2.56	0.9	0.74	3.81	99.67			21	167	589	42	255				11.5	1234	22.3	241	14.4		1476	106.4	213.4	24.1	88.3	13.41	3.16	10.14	1.16	4.65	0.88	2.4	0.26	1.71	0.24	5.18	0.76
Guo et al. (2014)	Luxi-EM2	09SD-179	45.18	1.05	11.98	8.22			0.13	11.36	11.89	2.48	0.87	0.73	5.94	99.85			20	160	497	39	209				12.3	1194	22.7	243	14.4		1333	107.9	215.1	24.3	89.5	13.41	3.2	9.98	1.2	4.83	0.88	2.36	0.27	1.68	0.25	5.39	0.77
Guo et al. (2014)	Luxi-EM2	09SD-171	48.3	1.13	12.17	8.79			0.13	11.91	10.13	2.72	0.85	0.74	2.71	99.58			22	167	613	43	256				12.3	1256	22.5	242	14.3		1465	106.1	213.9	24.1	88.5	13.76	3.2	9.7	1.18	4.99	0.88	2.39	0.27	1.66	0.23	5.21	0.77
Jahn et al. (1999)	Dabie-Sulu	BJ93-21	48.07	0.78	6.95			11.88	0.19	15.94	11.54	1.2	0.94	0.13	1.75	99.37				199	636	72	271				27	295	20	90	3.5		492	16.06	37.28		19.75	4.53	1.271	4.24		3.32		1.64		1.35	0.194
Jahn et al. (1999)	Dabie-Sulu	921-2	47.55	0.71	14.03			10.8	0.2	9.5	9.63	2.74	1.48	0.24	3.37	100.25				55	345	43	102				31	727	22	61	2		1100	17.9	41.4		22.3	4.84	1.89	5.42	0.91		1.17		0.45	2.64	0.34
Jahn et al. (1999)	Dabie-Sulu	BJ93-10	47.38	1.46	10.84			11.01	0.17	11.08	13.57	1.84	0.93	0.18	0.97	99.43				317	586	44	87				20	518	32	84	4.8		448	16.15	38.5		26.53	6.63	1.951	6.69		5.42		2.88		2.26	0.331
Jahn et al. (1999)	Dabie-Sulu	95DB-13P	50.1	1.12	17.3			8.52	0.14	6.47	9.65	3.2	1.23	0.29	0.45	98.47											23	923	18	122	7.68		636	26.74	56.23		27.05	5.59	2.012	5.662	0.701	3.829	0.701	1.816		1.51	0.224
Li et al. (1998)	Dabie-Sulu	DZh88-1	44.26	1.66	12.15		8.39	4.07	0.23	11.19	12.26	1.96	0.92	0.47	1.72	99.28					389		109				19.1	111	27.7	65	9.4		461	18.7	51.3	8.1	39.83	9.16	2.23	8.29	1.21	6.86	1.24	3.15	0.44	2.32	0.33
Li et al. (1998)	Dabie-Sulu	DZh-1	45.03	1.65	13.58		7.9	5.14	0.18	9.85	10.72	2.04	0.94	0.42	2.05	99.5					147		82.8				17.6	664	31.5	49.1	4.55		475	14.5	39.8	6.31	29.8	7.53	2.11	6.55	1.02	5.64	1.14	2.76	0.38	2.29	0.31	1.52	0.67
Li et al. (1998)	Dabie-Sulu	DZh-2	50.77	0.62	15.01		7.33	2.6	0.19	8.58	10.99	2.48	0.5	0.43	0.57	100.07					152		53.6				9.1	946	18.3	41.2	2		306	15.7	36.9	5.15	22	4.97	1.44	4.23	0.63	3.43	0.69	1.73	0.24	1.54	0.22	1.18	1.08
Li et al. (1998)	Dabie-Sulu	DZh-3	47.16	0.91	3.79		11.05	5.63	0.34	15.14	13.83	0.5	0.1	0.04	0.81	99.3					448		106				1	75	27	49	7		50	7.7	26	4.54	22.58	5.7	1.33	5.29	0.82	4.95	0.91	2.43	0.39	2.14	0.33
Liang et al. (2017)	Jiaobei terrain	HYZW-3-1	47.98	1.11	14.85	8.13	5.93	2.44	0.18	9.38	7.92	1.81	2.69	0.47	4.13	98.89				206	466	38.2	137				108	629	19.9	188	11.3		1830	31.9	64.6	7.46	28.2	5.76	1.73	5.44	0.75	4.14	0.78	2.12	0.33	1.94	0.29	4.75	0.61
Liang et al. (2017)	Jiaobei terrain	HYLGZ-1-3	45.31	1.12	14.71	8.08	4.35	4.15	0.15	8.25	9.97	2.59	2.87	0.86	4.69	99.02				199	294	30.2	101				61.1	1420	27.3	220	12.8		2133	64.2	133	15.5	62	10.6	2.98	8.69	1.07	5.22	0.94	2.36	0.36	2.16	0.32	5.15	0.65
Liang et al. (2017)	Jiaobei terrain	HYLGZ-1-1	44.26	1.17	14.49	8.68	4.78	4.33	0.15	9.09	9.13	2.55	2.82	0.92	5.38	99.07				202	278	35.1	119				60.1	1381	26.9	221	12.7		2046	65.9	139	15.7	59.3	10.8	2.94	8.76	1.05	5.29	0.93	2.51	0.37	2.17	0.33	5.25	0.63
Liang et al. (2017)	Jiaobei terrain	HYLGZ-1-2	44.87	1.11	14.94	8.03	4.67	3.73	0.14	7.95	8.87	2.93	2.92	0.91	5.92	98.96				195	196	29.9	92.6				63.6	1366	26.9	230	13.4		2051	67.8	137	15.4	60	10.1	2.86	8.28	0.98	5.1	0.9	2.37	0.35	2.02	0.3	4.99	0.66
Liang et al. (2017)	Jiaobei terrain	LYYJ-2-1	52.3	1.21	16	6.6	5.53	1.19	0.06	7.32	8.12	3.3	2.48	0.42	1.11	99.04				162	267	27.5	123				159	865	20.4	193	9.43		931	42.5	83.2	9.26	32.3	6.14	1.74	5.47	0.74	4.18	0.79	2.24	0.33	1.96	0.3	4.46	0.55
Liang et al. (2017)	Jiaobei terrain	LYYJ-2-3	52.2	1.2	16.09	6.7	5.68	1.13	0.06	7.35	8.14	3.32	2.36	0.41	1.03	98.97				160	279	27.6	122				155	848	20	186	9.16		817	45.5	88.8	9.87	37.2	6.43	1.81	5.35	0.71	3.98	0.77	2.2	0.33	2	0.31	4.45	0.56
Liang et al. (2017)	Jiaobei terrain	LYYJ-2-2	52.3	1.21	15.99	6.7	5.57	1.26	0.06	7.28	8.14	3.36	2.34	0.41	1.04	98.96				162	271	26.5	124				153	862	21.8	192	9.49		885	44.8	87.8	9.86	35.3	6.32	1.8	5.49	0.73	4.15	0.8	2.18	0.34	2.01	0.31	4.42	0.55
Liang et al. (2017)	Jiaobei terrain	HYZW-3-3	48.63	1.18	15.72	7.91	5.07	3.16	0.15	7.55	8.2	2.86	1.87	0.53	4.03	98.95				209	266	32.7	100				79.6	766	20.8	204	12.9		1572	32.6	67.5	7.71	28.6	5.82	1.78	5.23	0.71	3.97	0.77	2.18	0.33	1.92	0.29	4.63	0.66
Liang et al. (2017)	Jiaobei terrain	HYZW-3-2	48.39	1.13	15.24	7.97	5.32	2.94	0.15	8.49	8.65	2.52	1.63	0.48	4.08	99.02				208	387	36.5	127				67.3	738	20.7	203	12.2		1493	32.4	67.2	7.76	30.2	5.93	1.81	5.28	0.7	4.08	0.79	2.19	0.34	1.97	0.3	4.6	0.63
Liang et al. (2017)	Jiaobei terrain	LYYJ-1-2	51.53	0.81	14.21	6.57	4.99	1.76	0.07	9.8	7.4	2.48	1.18	0.24	4.61	99.08				158	617	42.2	322				36.3	687	15.5	138	4.89		831	29.8	58.8	6.39	22.1	4.26	1.25	3.92	0.53	3.02	0.59	1.6	0.26	1.56	0.24	3.29	0.28
Liang et al. (2017)	Jiaobei terrain	LYYJ-1-1	50.73	0.8	13.98	6.91	5.03	2.09	0.09	10.13	7.21	2.4	1.08	0.24	5.22	99				162	652	45.2	335				32.9	699	16.1	137	4.83		817	30.5	59.5	6.53	24.3	4.55	1.31	3.85	0.55	3.17	0.61	1.74	0.27	1.57	0.24	3.23	0.27
Liu et al. (2006)	Dabie-Sulu	GS1	51.95	0.43	15.97		2.85	3.95	0.17	6.54	8.97	2.86	1.91	0.22	3.73	99.55			22.2	174	459	30.9	171		92.8		52.8	641	17.6	131	8.35		1102	29	57.6	6.58	26.2	5.44	1.19	4	0.57	3.27	0.67	1.74	0.23	1.57	0.23	3.48	0.43
Liu et al. (2006)	Dabie-Sulu	LH2	51.38	0.11	18.4		2.8	3.7	0.15	7.31	7.56	2.81	1.83	0.22	3.2	99.47			22.3	169	509	35.6	220		79.3		49.9	608	19.3	118	7.84		1466	39.7	64.4	7.93	31	5.65	1.25	4.42	0.58	3.48	0.7	1.82	0.24	1.63	0.25	3.21	0.36
Liu et al. (2006)	Dabie-Sulu	WF2	49.95	0.12	16.87		2.44	4	0.15	6.54	8.5	3.19	1.93	0.2	5.53	99.42			22.5	150	338	30.9	70.1		60		60.6	604	25.8	132	6.73		1285	52	87.1	10.8	41	7.41	1.72	5.74	0.74	4.01	0.8	2.15	0.25	1.72	0.26	3.53	0.31
Liu et al. (2006)	Jiaobei terrain	LCI5	47.16	0.28	17.32		4.02	3.01	0.2	8.02	11.42	2.61	2.47	0.3	3.15	99.96			23	177	560	35.8	174		68.6		66.8	801	19.9	156	7.54		1642	56.7	103	11.2	43.1	7.17	1.58	5.26	0.67	3.67	0.72	1.9	0.24	1.75	0.28	4.04	0.33
Liu et al. (2006)	Jiaobei terrain	LCI7	45.18	0.12	17.63		4.12	3.96	0.19	9.05	12.79	2.27	1.92	0.22	3.22	100.67			28.1	184	773	43.9	238		75.4		42	866	22.6	140	7.11		1587	52.2	95.2	10.9	42.7	7.71	1.82	5.73	0.75	3.88	0.78	2.1	0.27	1.76	0.28	3.76	0.32
Liu et al. (2006)	Jiaobei terrain	DK9	51.09	0.31	18.71		3.75	2.88	0.14	6.63	7.42	2.94	2.32	0.27	2.94	99.4			21	148	381	33.4	120		69.7		50.8	1083	19.7	171	8.21		2054	73.2	129	13.5	48.1	7.55	1.62	5.43	0.64	3.41	0.69	1.79	0.23	1.6	0.24	4.32	0.41
Liu et al. (2006)	Jiaobei terrain	CG2	45.02	0.56	18.18		5.05	2.99	0.16	9.74	8.87	2.71	2.07	0.31	4	99.66			26	191	535	40.9	223		82.8		62.7	803	23.5	140	8.02		1817	67.2	132	13.9	55.8	9.14	1.99	6.16	0.8	4.29	0.83	2.26	0.29	1.97	0.29	3.67	0.36
Liu et al. (2006)	Jiaobei terrain	DK3	48.37	0.12	17.18		4.1	3.23	0.18	7.67	9.08	2.9	2.04	0.32	4.24	99.43			23.1	169	414	34.2	114		76.7		47.5	1090	20.6	151	8.62		2792	57.3	110	12.3	45.6	7.43	1.64	5.36	0.69	3.77	0.72	1.92	0.27	1.78	0.26	4.14	0.38
Liu et al. (2006)	Jiaobei terrain	LCII8	46.99	0.55	16.26		3.98	2.84	0.18	8.64	9.43	2.71	1.82	0.3	6	99.7			21.6	156	450	37.2	181		63.5		39.5	756	18.1	138	7.2		1931	44.5	93.1	10.3	41.1	7.25	1.53	4.95	0.66	3.51	0.7	1.79	0.24	1.53	0.23	3.53	0.36
Liu et al. (2006)	Jiaobei terrain	LCII6	46.58	0.27	17.32		3.15	2.97	0.15	7.98	11.9	3.36	1.66	0.3	4.1	99.74			22	162	327	36.7	170		68.2		45.7	824	18	139	7.29		2645	46.9	93.7	10.3	40.1	6.92	1.53	5.11	0.64	3.51	0.67	1.75	0.23	1.69	0.24	3.54	0.34
Liu et al. (2006)	Jiaobei terrain	LM1	48.26	0.25	17.18		4.5	3.15	0.16	10.05	10.7	2.37	1	0.25	2.02	99.89			29.5	192	730	46.5	249		108		44.6	691	21.9	134	7.78		1379	53.1	91.6	11	41.9	7.95	1.6	5.46	0.78	3.98	0.82	2.18	0.28	1.94	0.32	3.63	0.34
Liu et al. (2006)	Luxi-EM2	GCH6	49.7	0.77	12.58		7.7	2.97	0.21	11.31	9.84	0.88	0.56	0.16	2.65	99.38			42	264	1316	69.4	330		119		22	470	15.8	28.8	1.6		238	8.29	21.3	2.95	13.7	3.45	1.11	3.31	0.5	2.98	0.59	1.58	0.2	1.49	0.22	1.07	0.07
Liu et al. (2006)	Luxi-EM2	GCH2	48.73	0.83	7.97		7.98	3.5	0.21	14.95	10.11	0.68	0.43	0.2	3.72	99.31			50.8	228	1800	82.5	437		123		14.4	298	15.3	38.7	1.63		285	7.36	18.9	2.66	13.2	3.57	0.87	3.51	0.51	2.9	0.59	1.49	0.22	1.36	0.21	1.42	0.08
Liu et al. (2006)	Luxi-EM2	KL8	49.02	0.15	18.02		5.3	3.86	0.25	7.59	9.19	2.54	1.12	0.37	2.56	99.98			30.9	194	371	40.7	89.1		92.1		27.7	702	17.4	83.3	5.04		677	21.1	48.1	5.88	25.4	5.06	1.33	4.16	0.57	3.31	0.61	1.69	0.21	1.43	0.22	2.38	0.23
Liu et al. (2006)	Luxi-EM2	SW1	50.06	0.23	18.1		5.05	3.85	0.18	6.04	6.15	3.64	1.49	0.3	4.55	99.64			25.7	216	169	31.7	39.4		83.7		37.3	546	17.9	95	4.94		1264	29.3	56.2	6.65	27.4	5.17	1.37	4.3	0.57	3.33	0.64	1.74	0.21	1.47	0.23	2.56	0.22
Liu et al. (2006)	Luxi-EM2	GCH7	51.59	0.68	14.72		5.1	3.43	0.19	10.49	9.04	1.29	0.46	0.1	2.5	99.59			38.5	245	1127	56.4	285		93.3		9.82	553	11.9	21.9	0.73		315	7.32	15.9	2.01	10.2	2.8	0.87	2.34	0.37	2.2	0.47	1.21	0.17	1.04	0.16	0.85	0.03
Liu et al. (2006)	Luxi-EM2	GCH4	52.75	0.95	14.42		5.3	3.79	0.18	7.67	8.83	1.91	0.49	0.25	2.94	99.48			37	266	738	48.1	199		97		15.5	565	16.3	31.7	2.97		577	15.1	32.7	4.06	17.9	4.12	1.17	3.62	0.54	3.21	0.61	1.62	0.22	1.5	0.22	1.16	0.14
Liu et al. (2008)	Dabie-Sulu	JNM3	51.5	1.13	15.96			8.71	0.18	6.11	7.44	3.03	3.14	0.47	2.11	99.78				188.9	224.5	34	79.6				140	1124	25.2	261	8.9		3342	61.2	123.6	14.1	55.6	9.41	2.51	6.12	0.97	5.21	0.96	2.71	0.36	2.24	0.34	5.47	0.7
Liu et al. (2008)	Dabie-Sulu	JNM2	51.65	1.105	15.6			8.96	0.16	6.62	7.67	2.8	2.627	0.46	1.94	99.592				17.9	9.3	2.4	5				146	1234	19.5	103	17.1		2872	68.6	132	14.2	43.4	5.77	1.48	3.92	0.65	3.57	0.68	2.14	0.29	2.12	0.32	3.31	0.96
Liu et al. (2008)	Dabie-Sulu	JXM3	50.72	0.799	14.69			8.35	0.12	9.86	7.74	2.5	2.286	0.42	2.32	99.805				162.3	577.8	40.8	146.1				36.4	1171	19.3	181	6.7		3860	62	119	13.2	48.9	7.68	1.75	5.05	0.72	3.75	0.7	2.03	0.26	1.74	0.26	4.02	0.1
Liu et al. (2009)	Jiaobei terrain	B1-1	50.1	1.28	15.47			9.59	0.11	6.1	7.9	2.85	3.64	0.67	2.01	99.73			20.5	150	481	33.1	164				103	801	16	142	7.68		3333	55	106	11.5	42.4	7.03	0.96	4.28	0.57	3.46	0.62	1.75	0.23	1.52	0.22	3.54	0.49
Liu et al. (2009)	Jiaobei terrain	B6-4	47.1	1.6	14.2			11.95	0.18	8.39	9.42	2.74	1.14	0.4	2.92	100.04			20.6	162	212	47.1	144				6	388	17.3	84	9.6		297	10.1	21.1	2.64	11.7	3.09	1.05	3.32	0.56	3.51	0.67	1.82	0.24	1.48	0.22	2.3	0.61
Liu et al. (2009)	Jiaobei terrain	B6-3	47.09	1.62	13.92			11.82	0.17	8.28	9.22	2.7	1.08	0.35	3.78	100.03			20.6	182	211	43.7	150				23.9	515	17.7	115	26.3		504	20.2	40.1	4.62	18.7	3.99	1.26	3.62	0.59	3.69	0.69	1.8	0.24	1.53	0.22	2.91	1.61
Liu et al. (2009)	Jiaobei terrain	B6-6	48.28	1.63	14.59			11.41	0.16	8.32	9.19	3.34	1.28	0.25	1.48	99.93			14.4	123	136	27.8	912				43.2	502	14.6	93	19.6		1089	16.1	29.8	3.53	14.1	3.13	1.15	2.9	0.45	2.76	0.53	1.46	0.29	1.28	0.19	2.39	1.2
Liu et al. (2009)	Jiaobei terrain	B6-7	48.39	1.62	14.67			11.26	0.15	8.26	9.15	3.41	1.3	0.3	1.19	99.71			20.6	174	248	47.5	181				20.6	517	16.6	112	24.4		434	18.9	37.5	4.27	17.2	3.72	1.17	3.37	0.56	3.41	0.64	1.74	0.23	1.44	0.2	2.68	1.45
Liu et al. (2009)	Jiaobei terrain	B6-5	47.5	1.61	13.85			11.82	0.16	8.44	9.31	2.74	1	0.34	2.66	99.42			21.4	100	220	44.6	154				25.6	539	18.7	126	27.4		483	20.6	40.4	4.58	18.6	4.11	1.25	3.71	0.6	3.65	0.7	1.87	0.24	1.53	0.21	2.95	1.61
Liu et al. (2009)	Jiaobei terrain	B6-1	48.7	1.4	14.33			11.91	0.15	7.7	8.57	2.58	0.58	0.21	3.25	99.39			20.3	166	206	44.8	145				12.8	362	17.1	85	10.2		321	11.1	22.7	2.79	12	3.15	1.04	3.27	0.56	3.39	0.67	1.82	0.24	1.52	0.23	2.32	0.63
Liu et al. (2009)	Jiaobei terrain	B6-2	46.32	1.44	14.2			11.61	0.1	7.84	8.59	2.79	0.59	0.22	3.83	99.54			21	178	216	45.2	150				16.2	486	18	114	19.6		413	17.3	34	3.97	16.4	3.74	1.1	3.46	0.59	3.67	0.72	1.94	0.26	1.68	0.24	2.93	1.22
Liu et al. (2015)	Luxi-EM2	CY4	51.51	0.87	14.71	9.25			0.14	9.79	7.38	2.64	2.52	0.51	0.26	99.58					525		128				51.9	1124	19.2	186	6.54		3016	64.1	131	14.2	49.4	7.63	1.92	6.45	0.82	3.82	0.81	2.14	0.29	1.79	0.28	3.93	0.12
Liu et al. (2015)	Luxi-EM2	CY3	51.49	0.84	14.51	9.28			0.13	9.78	7.35	2.67	2.54	0.45	0.55	99.59					566		233				52.6	652	17.5	142	5.93		1551	32.4	54.2	7.16	31.2	5.42	1.43	4.87	0.65	3.43	0.76	1.95	0.27	1.71	0.26	3.21	0.13
Liu et al. (2015)	Luxi-EM2	CY1	51.52	0.86	14.72	9.27			0.15	9.82	7.36	2.66	2.53	0.48	0.25	99.61					506		154				48.4	987	19.6	221	7.32		2242	65.6	133	15.4	53.8	8.42	2.12	6.24	0.85	4.13	0.82	2.13	0.32	1.93	0.29	4.52	0.14
Liu et al. (2015)	Luxi-EM2	CY2	51.55	0.83	14.63	9.26			0.14	9.76	7.37	2.65	2.51	0.46	0.43	99.59					121		68.6				62.5	1293	23.5	275	9.86		4312	92.3	195	22.1	76.8	13.2	2.98	9.65	1.16	5.05	0.91	2.42	0.33	1.96	0.32	5.13	0.15
Liu et al. (2015)	Luxi-EM2	WF2	51.49	0.78	14.65	9.27			0.15	9.76	7.35	2.66	2.51	0.52	0.43	99.57					451		135				58.5	1164	19.1	218	7.13		2511	72.5	138	16.4	54.5	8.15	2.12	6.42	0.83	3.83	0.83	2.11	0.28	1.78	0.27	4.43	0.13
Liu et al. (2015)	Luxi-EM2	WF1	51.48	0.79	14.68	9.26			0.14	9.75	7.34	2.68	2.49	0.53	0.45	99.59					372		73.7				63.2	675	24.3	164	5.16		1424	55.3	91.8	13.1	44.2	7.16	1.85	6.16	0.84	4.11	0.85	2.22	0.31	1.75	0.28	3.54	0.11
Liu et al. (2015)	Luxi-EM2	JX3	51.48	0.74	14.69	9.28			0.14	9.74	7.31	2.66	2.47	0.53	0.47	99.51					163		66.5				131	753	27.6	292	8.43		4853	66.4	118	16.1	57.4	9.82	2.42	9.06	1.12	5.55	1.11	2.92	0.37	2.54	0.38	5.76	0.54
Liu et al. (2015)	Luxi-EM2	YS1	51.49	0.77	14.68	9.29			0.14	9.75	7.35	2.69	2.48	0.53	0.42	99.59					66.4		53.9				74.5	1681	23.4	254	9.92		7643	97.4	195	22.2	79.3	12.8	2.78	10.8	1.15	4.96	0.94	2.44	0.32	1.94	0.31	5.15	0.15
Liu et al. (2015)	Luxi-EM2	YS3	51.48	0.76	14.67	9.27			0.13	9.76	7.32	2.67	2.46	0.55	0.45	99.52					322		59.5				96.2	696	16.5	166	5.48		2152	47.5	94.3	12.4	42.2	6.87	1.76	5.45	0.73	3.42	0.64	1.76	0.24	1.54	0.24	3.83	0.11
Liu et al. (2015)	Luxi-EM2	JX4	51.47	0.76	14.72	9.26			0.13	9.72	7.29	2.68	2.45	0.55	0.45	99.48					237		82.7				138	985	26.3	274	8.32		2576	62.3	124	15.4	55.3	9.43	2.37	8.22	0.97	5.14	0.96	2.74	0.36	2.33	0.35	5.32	0.55
Liu et al. (2015)	Luxi-EM2	WF3	51.47	0.77	14.67	9.25			0.13	9.73	7.36	2.71	2.47	0.54	0.39	99.49					368		78.6				73.6	727	32.3	173	5.45		1732	59.4	97.6	14.3	52.4	8.76	2.23	7.55	0.98	5.45	1.13	3.21	0.45	2.93	0.46	3.76	0.12
Liu et al. (2015)	Luxi-EM2	YS4	51.52	0.76	14.65	9.26			0.14	9.75	7.36	2.68	2.44	0.48	0.53	99.57					278		98.5				85.8	1051	25.2	263	7.67		3393	58.7	118	15.3	53.5	9.13	2.44	8.18	0.96	4.91	0.96	2.63	0.35	2.12	0.34	5.16	0.52
Liu et al. (2015)	Luxi-EM2	WF4	51.46	0.76	14.69	9.26			0.15	9.77	7.33	2.72	2.46	0.51	0.47	99.58					284		57.5				84.3	592	37.6	176	5.59		1728	55.2	98.2	13.1	46.5	7.55	1.96	6.78	0.92	5.18	1.12	3.08	0.42	2.54	0.38	3.75	0.11
Liu et al. (2015)	Luxi-EM2	YS2	51.51	0.75	14.66	9.25			0.13	9.74	7.34	2.71	2.45	0.49	0.53	99.56					585		165				39.3	1157	19.5	178	6.74		3865	64.6	124	15.3	50.8	7.78	1.83	6.74	0.81	3.84	0.75	2.15	0.28	1.85	0.28	4.14	0.12
Liu et al. (2015)	Luxi-EM2	JX1	51.53	0.74	14.64	9.25			0.15	9.76	7.35	2.72	2.45	0.47	0.49	99.55					266		93.6				126	868	26.4	271	8.04		2964	61.6	125	15.5	56.4	9.45	2.45	8.54	0.98	5.13	0.95	2.72	0.37	2.33	0.35	5.45	0.53
Liu et al. (2015)	Luxi-EM2	JN2	52.21	0.67	14.62	9.24			0.12	9.69	7.31	2.75	2.46	0.43	0.28	99.78					292		107				128	976	25.5	261	7.93		2473	59.6	119	15.3	53.4	8.97	2.44	7.83	0.94	4.94	0.95	2.64	0.35	2.31	0.34	5.15	0.53
Liu et al. (2015)	Luxi-EM2	JN4	52.18	0.71	14.58	9.22			0.12	9.72	7.33	2.72	2.43	0.45	0.29	99.75					274		84.6				73.6	869	25.3	272	8.13		2605	64.2	126	15.2	56.4	9.32	2.42	7.86	0.95	5.16	0.96	2.63	0.36	2.32	0.36	5.43	0.64
Liu et al. (2015)	Luxi-EM2	JX2	51.51	0.75	14.65	9.24			0.12	9.75	7.33	2.73	2.43	0.48	0.55	99.54					264		85.8				76.7	962	26.5	275	7.85		2126	62.5	126	15.3	56.5	9.65	2.46	7.96	0.97	5.15	0.97	2.73	0.36	2.41	0.36	5.43	0.55
Liu et al. (2015)	Luxi-EM2	LY4	51.52	0.75	14.66	9.27			0.13	9.76	7.34	2.71	2.41	0.46	0.65	99.66					236		82.9				154	1142	27.4	291	8.93		3353	63.3	127	15.4	56.8	9.54	2.53	8.75	0.96	5.35	0.98	2.82	0.38	2.32	0.36	5.54	0.69
Liu et al. (2015)	Luxi-EM2	JN1	51.53	0.73	14.66	9.27			0.13	9.75	7.34	2.74	2.43	0.46	0.53	99.57					176		65.6				94.5	864	28.4	286	8.54		3815	66.5	135	16.2	58.7	10.5	2.62	8.93	1.13	5.72	1.14	2.93	0.38	2.42	0.38	5.83	0.57
Liu et al. (2015)	Luxi-EM2	LY1	52.17	0.73	14.55	9.24			0.13	9.75	7.28	2.69	2.38	0.46	0.36	99.74					263		83.5				85.7	1054	26.2	278	8.64		1283	64.5	128	16.3	57.6	9.64	2.48	7.85	1.05	5.43	0.98	2.82	0.35	2.43	0.37	5.45	0.65
Liu et al. (2015)	Luxi-EM2	JN3	51.51	0.77	14.67	9.25			0.13	9.74	7.32	2.74	2.42	0.46	0.56	99.57					315		122				143	978	26.1	253	9.44		2852	67.1	134	16.2	58.6	9.87	2.45	8.55	0.98	5.35	0.97	2.67	0.36	2.36	0.36	5.22	0.62
Liu et al. (2015)	Luxi-EM2	LY3	51.51	0.74	14.65	9.26			0.12	9.68	7.33	2.73	2.41	0.47	0.67	99.57					287		114				123	969	25.6	248	8.24		2445	58.6	118	14.3	53.2	8.94	2.54	7.73	0.95	4.93	0.94	2.64	0.35	2.21	0.33	5.12	0.67
Liu et al. (2015)	Luxi-EM2	LY2	52.15	0.75	14.52	9.26			0.14	9.77	7.31	2.67	2.35	0.49	0.32	99.73					181		76.3				121	981	24.3	255	8.28		1471	53.1	106	13.1	48.4	8.31	2.22	6.74	0.94	5.66	0.92	2.43	0.36	2.14	0.32	4.93	0.66
Liu et al. (2019)	Jiaobei terrain	MPWGZ-4-2	53.82	0.7	14.89	6.48			0.09	6.04	5.78	3.27	3.31	0.43	4.3	99.11	28.3	1.37	13.9	112	268	22.3	118	7.6	72.5	19.1	71.5	582	16.2	184	9.7	1.53	1591	70	129	13.7	50	7.72	2.44	7.29	0.73	3.5	0.65	1.79	0.24	1.53	0.24	4.69	0.51
Liu et al. (2019)	Jiaobei terrain	MPWGZ-4-1	53.96	0.73	14.92	6.29			0.1	6.17	5.87	3.63	3.65	0.45	3.3	99.07	21.7	1.44	14.4	115	258	13.8	114	7.5	76.9	19.2	76.9	680	16.8	188	9.9	0.96	1817	72.9	136	14.5	53	8.12	2.59	7.51	0.76	3.64	0.65	1.85	0.24	1.55	0.24	4.59	0.5
Liu et al. (2019)	Jiaobei terrain	MPWGZ-7-1	51.37	0.99	15.18	7.42			0.13	7.78	7.27	3.14	3.02	0.65	1.98	98.93	25.3	1.49	20.6	156	220	27.6	136	79.9	97.2	18.7	78	667	22.2	227	14.2	1.67	1503	92.4	162	18.5	67.5	10.26	3.1	9.63	0.98	4.86	0.9	2.53	0.33	2.2	0.32	5.36	0.67
Liu et al. (2019)	Jiaobei terrain	MPWGZ-7-2	51.85	1	15.43	7.53			0.12	7.65	6.98	3.25	2.96	0.66	2.01	99.44	24	1.53	19.1	155	210	26.9	127	66.3	92.3	18.8	76.5	670	22.3	228	14.3	1.41	1534	87.4	156	18.1	67.1	10.34	3.15	9.54	1	5	0.92	2.57	0.34	2.19	0.33	5.75	0.71
Liu et al. (2019)	Jiaobei terrain	MPWGZ-8-1	50.92	0.87	14.68	8.05			0.12	8.6	8.27	3.05	2.52	0.5	1.73	99.31	13	1.28	23.5	173	269	35.5	149	32	81.1	18.2	65.1	670	20.6	183	8.4	1.4	1240	75.2	147	16.1	61.2	9.69	2.86	8.88	0.93	4.61	0.84	2.38	0.31	1.98	0.29	4.75	0.41
Liu et al. (2019)	Jiaobei terrain	MPWGZ-5-2	55.17	0.67	14.73	6.41			0.07	6.1	6.1	3.18	2.62	0.35	4.24	99.64	30.3	1.39	17.2	117	210	18.2	114	24.6	52.7	17.2	57.4	543	18	161	8.3	1.72	1487	62.4	124	14	53.8	8.44	2.59	7.73	0.82	4.02	0.73	2.06	0.27	1.76	0.26	4.18	0.45
Liu et al. (2019)	Jiaobei terrain	MPWGZ-6-1	51.5	0.83	15.39	8.71			0.11	8.33	7.68	2.72	2.16	0.28	1.6	99.31	21.8	1.08	18.4	170	232	32.9	138	18.9	80.2	18.8	71.1	498	18	153	7	1.95	1421	49.7	95	10.4	39.8	6.56	1.98	6.48	0.74	3.94	0.75	2.14	0.29	1.92	0.28	3.99	0.37
Liu et al. (2019)	Jiaobei terrain	MPWGZ-5-1	55.4	0.66	14.73	6.66			0.08	6.29	5.77	3.34	2.43	0.34	3.62	99.32	24.4	1.4	17.6	119	225	16.5	128	23.7	70.9	18.2	72.5	586	16.2	164	8.3	1.43	1233	73.4	147	16.3	60.7	8.97	2.54	7.73	0.79	3.68	0.65	1.82	0.24	1.53	0.24	4.25	0.46
Liu et al. (2019)	Jiaobei terrain	MPWGZ-8-2	50.49	0.88	14.57	8.02			0.11	8.4	8.06	3.98	2.51	0.51	1.81	99.34	12.4	1.23	21	171	267	35	148	36.2	81	17.9	62.5	650	20	175	8.2	1.41	1218	73.3	144	15.8	59.8	9.58	2.84	8.77	0.91	4.55	0.83	2.32	0.3	1.97	0.3	4.55	0.4
Liu et al. (2019)	Jiaobei terrain	MPWGZ-6-2	51.77	0.84	15.79	7.43			0.11	7.19	7.68	3.3	2.05	0.32	1.59	98.07	20.7	1.25	19.3	160	292	21.7	117	41	74.6	19	62.4	528	19.4	166	7.7	1.83	1444	55.7	105	11.3	42	6.92	2.11	6.62	0.77	4.03	0.79	2.24	0.31	1.96	0.3	4.11	0.4
Long et al. (2017)	Dabie-Sulu	SL-1	45.47	0.74	12.98	7.85			0.15	9.68	8.76	1.59	2.72	0.35	9.51	99.8					684	81.7	203				140	1164	17.7	120	5.01	6.81	1835	54.1	101	10.8	40.6	6.44	1.76	5.12	0.61	3.17	0.6	1.64	0.24	1.57	0.24	2.74	0.23
Long et al. (2017)	Dabie-Sulu	SL-17	52.27	0.84	14.74	7.19			0.14	6.72	7.04	2.53	2.98	0.35	4.46	99.26					391	52.6	136				126	1016	18.6	177	7.84	1.35	1989	47.4	92.6	10.2	39.5	6.7	1.93	5.28	0.65	3.33	0.62	1.7	0.24	1.62	0.25	4.03	0.43
Long et al. (2017)	Dabie-Sulu	SL-10	53.84	0.81	14.57	7.65			0.15	7.09	7.04	3.08	2.77	0.45	1.4	98.85					377	33.3	88				78.6	999	19.9	181	9.11	1.76	1810	48.4	94.6	10.4	40.4	7.06	1.89	5.66	0.69	3.57	0.66	1.8	0.26	1.71	0.27	4.25	0.51
Long et al. (2017)	Dabie-Sulu	SL-3	48.55	1.09	13.49	9.59			0.14	11.18	6.97	2.42	2.16	0.56	2.52	98.67					718	90	227				62.4	806	20.6	156	7.99	1.14	1576	42.3	87.3	10.3	43.1	8.18	2.26	6.54	0.8	4	0.72	1.83	0.25	1.6	0.23	3.78	0.38
Long et al. (2017)	Dabie-Sulu	SL-9	53.05	0.83	14.7	7.79			0.12	7.5	6.94	2.94	2.55	0.51	1.8	98.73					465	52.2	132				76.4	957	23	205	9.6	6.6	2068	64.9	128	14.3	55.8	9.83	2.51	7.74	0.9	4.39	0.76	2.03	0.28	1.85	0.28	4.72	0.52
Long et al. (2017)	Dabie-Sulu	SL-2	45.54	0.74	11.91	9.23			0.16	12.73	10.09	1.78	1.3	0.26	5.3	99.04					1176	126	313				40.1	705	16.7	105	3.94	2.37	1015	43.6	83.8	9.28	36.3	6.01	1.61	4.81	0.58	3.02	0.57	1.56	0.22	1.46	0.22	2.53	0.19
Long et al. (2017)	Dabie-Sulu	SL-12	52.58	0.89	15.49	7.65			0.19	6.07	7.36	3.83	2.55	0.58	0.76	97.95					271	38.8	102				78.2	1415	21.6	224	9.88	2.81	2224	77.3	147	15.8	59.8	9.51	2.41	7.31	0.83	4.06	0.71	1.93	0.26	1.77	0.27	4.91	0.45
Long et al. (2017)	Jiaobei terrain	LL-2	44.53	1.01	11.43	9.24			0.16	10.07	10.51	2.27	4.13	1.19	4.47	99.01					413	34	153				106.7	2056	28.95	267.2	21.52	4.03	2595	131.9	252.1	28.77	106	14.84	3.74	11.57	1.21	5.59	0.98	2.6	0.33	2.06	0.3	5.63	0.65
Long et al. (2017)	Jiaobei terrain	LL-5	45.46	0.85	9.48	8.2			0.12	13.26	9.49	1.16	1.74	0.59	9.44	99.79					694	43.5	328				47.6	2342	18.6	128.1	6.68	2.72	3065	86.38	167.49	19.58	74.79	10.84	2.63	7.78	0.79	3.53	0.64	1.72	0.22	1.33	0.19	2.8	0.28
Long et al. (2017)	Jiaobei terrain	LL-11	47.71	0.93	13.83	7.83			0.13	8.03	8.03	2.51	3.11	0.64	6.25	99					383	32.5	155				73.84	1417	21.17	201.8	10.3	1.26	2187	93.6	171.9	18.79	68.94	10.01	2.6	7.86	0.82	3.89	0.68	1.9	0.25	1.5	0.23	4.13	0.41
Long et al. (2017)	Jiaobei terrain	LL-7	49.17	0.77	13.59	7.6			0.11	8.7	8.07	2.09	2.31	0.24	7.16	99.81
Long et al. (2017)	Jiaobei terrain	LL-3	48.34	0.68	12.94	7.11			0.11	9.59	7.53	2.55	2.24	0.27	8.41	99.77					645	35.7	235				39.92	1087	13.87	144.3	5.25	1.06	1270	41.92	77.08	8.61	31.61	4.8	1.36	3.96	0.47	2.45	0.46	1.3	0.18	1.14	0.17	3.1	0.23
Long et al. (2017)	Jiaobei terrain	LL-9	55.05	0.86	14.87	7.13			0.11	6.77	4.85	3.45	2.81	0.39	2.96	99.25					392	29.5	161				59.57	1221	17.53	201.7	8.9	0.22	1957	64.37	116.3	13.12	47.26	7.08	1.93	5.54	0.62	3.08	0.58	1.59	0.22	1.28	0.2	4.15	0.39
Long et al. (2017)	Jiaobei terrain	LL-6	49.14	0.8	14.37	8.24			0.12	8.75	7.53	2.59	1.85	0.32	5.83	99.54					591	32.6	199				42.28	878	18.72	145.1	6.23	0.47	1263	56.33	98.47	11.4	41.94	6.38	1.66	5.24	0.62	3.21	0.61	1.74	0.25	1.52	0.23	3.1	0.27
Long et al. (2017)	Jiaobei terrain	LL-8	52.22	0.78	13.87	7.21			0.13	7.93	7.42	2.85	2.01	0.36	5.11	99.89					529	31.4	135				44.48	938	17.79	186.8	7.8	0.17	1599	57.58	106	12.06	43.51	6.62	1.78	5.39	0.62	3.14	0.59	1.64	0.23	1.38	0.21	3.96	0.34
Long et al. (2017)	Jiaobei terrain	LL-10	49.92	0.9	14.28	7.77			0.12	8.67	7.74	2.98	2.08	0.35	4.94	99.75					595	33.2	156				41.71	976	18.4	163.7	7.39	0.18	1522	44.6	84.58	9.79	36.73	5.78	1.62	4.81	0.58	3.14	0.61	1.68	0.23	1.47	0.23	3.52	0.32
Long et al. (2017)	Jiaobei terrain	LL-1	48.55	0.77	12.89	8.5			0.13	11.43	8.04	2.52	1.5	0.23	4.18	98.74					795	41.9	248				24.18	1735	16.24	133.4	4.28	0.28	913	40.38	75.54	8.64	32.34	5.26	1.42	4.21	0.52	2.86	0.55	1.54	0.21	1.37	0.21	2.84	0.2
Ma et al. (2014a)	Jiaobei terrain	JJLT-04	47.56	0.97	14.41	10.68	5.67	4.38	0.3	9.26	8.34	1.65	3.13	0.36	3.87	99.89				133	392	10.5	190				126	958	23.57	187	11.45		1522	65.81	121	14.78	50.74	8.66	2.74	7.6	0.77	3.79	0.69	1.72	0.24	1.49	0.22	3.39	0.56
Ma et al. (2014a)	Jiaobei terrain	JJLT-07	48.95	0.82	13.03	8.34	4.23	3.64	0.16	10.7	7.73	1.67	3.1	0.39	5.58	99.99				144	554	35.31	197				78	934	19.31	144	5.66		2064	56.15	115	13.31	50.29	8.06	2.2	6.18	0.69	3.47	0.68	1.65	0.23	1.45	0.22	3.01	0.38
Ma et al. (2014a)	Jiaobei terrain	JJLT-02	49.96	0.82	13.13	8.05	4.6	2.94	0.15	10.45	7.89	1.68	3.09	0.45	4.57	99.72				133	470	33.65	163				54	1481	17.64	134	6.8		2395	60.05	116	13.41	45.47	7.79	2.38	6.07	0.67	3.34	0.62	1.77	0.23	1.57	0.22	3.03	0.4
Ma et al. (2014b)	Jiaobei terrain	PL-07	47.52	0.9	13.27	12.27	6.93	4.57	0.09	9.32	5.17	1.3	2.05	0.3	8.58	99.99				210.7	374	50.83	61				55.45	357	22.46	138.7	5.25		365	50.46	102.6	11.95	46.85	7.7	2.23	6.25	0.87	4.55	0.84	2.5	0.39	2.44	0.38	3.86	0.34
Ma et al. (2014b)	Jiaobei terrain	LL-11	49.61	0.83	14.08	8.15	5.5	2.04	0.11	6.83	7.19	2.45	3.31	0.47	7.35	99.78				152.5	219	28.39	108.8				82.75	960	17.16	164.5	7.04		2258	62.58	126.4	12.63	48.18	7.09	2.08	5.74	0.6	3.6	0.66	1.94	0.25	1.64	0.21	3.49	0.45
Ma et al. (2014b)	Jiaobei terrain	LL-07	50.96	0.66	13.56	8.29	4.94	2.8	0.11	7.2	7.55	2.26	2.99	0.22	6.43	99.67				168.4	563	40.93	241.8				56.45	1109	16.94	175.6	5.52		1823	54.93	110.4	11.4	43.3	6.64	1.75	5.26	0.54	3.46	0.65	1.92	0.25	1.66	0.21	3.74	0.69
Ma et al. (2014b)	Jiaobei terrain	PL-05	50.02	0.72	13.06	7.93	5.48	1.84	0.11	9.11	5.63	2.29	2.78	0.27	7.24	98.56				152.3	582	39.1	250.4				115.3	397	15.8	148.5	6.79		1365	45.32	90.1	9.82	36.66	5.79	1.56	4.28	0.49	3.28	0.62	1.91	0.25	1.43	0.24	3.76	0.63
Ma et al. (2014b)	Jiaobei terrain	LL-02	48.89	0.79	14.35	9.82	7.02	2.02	0.14	7.85	8.04	2.05	2.42	0.35	4.96	98.87				186.1	461	35.75	186.8				61.75	1133	17.76	165.5	6.36		1792	67.2	130.4	13.61	50.93	7.46	2.01	5.96	0.62	3.73	0.76	2.11	0.27	1.82	0.25	3.83	0.43
Ma et al. (2014b)	Jiaobei terrain	PL-02	49.86	0.78	13.33	8.48	5.05	2.87	0.1	9.24	6.52	1.98	2.26	0.27	6.35	98.62				143.4	332	41	95				67.89	776	15.17	149.3	5.87		1210	43.51	89.3	9.48	36.29	5.73	1.64	4.76	0.62	3.21	0.57	1.68	0.25	1.46	0.22	3.95	0.34
Ma et al. (2014b)	Jiaobei terrain	LL-05	48.28	0.74	12.58	8.93	5.48	2.84	0.12	10.71	8.45	2.14	2.34	0.31	5.89	99.88				181.7	571	41.28	263.2				64.93	1358	16.96	137.4	4.78		1560	66.2	155	14.18	51.88	7.72	2.04	6.1	0.61	3.48	0.68	2.05	0.24	1.66	0.23	3.07	0.45
Ma et al. (2014b)	Jiaobei terrain	LL-10	51.17	0.68	13.76	8.09	5.25	2.25	0.1	7.16	7.07	2.41	2.62	0.28	7	99.75				153.2	402	33.01	180				72.91	1159	15.8	186.7	5.48		2290	53.48	100.9	10.44	39.22	5.91	1.68	4.78	0.5	3.09	0.57	1.75	0.22	1.52	0.2	4.08	0.39
Ma et al. (2014b)	Jiaobei terrain	LL-04	47.12	0.8	12.92	8.81	4.7	3.58	0.13	11.33	9.05	2.1	2.28	0.3	5.61	99.93				190	678	42.39	249.8				71.78	1790	15.87	140.3	4.32		1781	59.91	117.1	12.7	47.4	7.31	1.94	5.69	0.56	3.29	0.66	1.87	0.23	1.53	0.22	3.21	0.31
Ma et al. (2014b)	Jiaobei terrain	PL-04	46.43	0.89	12.91	10.11	5.2	4.34	0.15	9.83	10.75	2.02	2.06	0.3	5	99.87				183.9	341	42.88	57.6				37.79	1590	18.15	126	4.78		1821	46.96	97.7	10.66	42.37	6.82	1.88	5.64	0.7	3.79	0.67	1.98	0.28	1.8	0.27	3.44	0.37
Ma et al. (2014b)	Jiaobei terrain	LL-09	47.91	0.74	12.95	9.25	5.72	2.9	0.12	9.48	8.45	2.2	2.18	0.34	6.97	99.95				187.3	561	43.87	254.2				74.02	1052	17.15	134.7	5.45		1695	72.2	146	14.96	56.97	8.26	2.13	6.46	0.61	3.69	0.68	2.01	0.23	1.66	0.24	3.1	0.53
Ma et al. (2014b)	Jiaobei terrain	LL-06	48.12	0.76	12.82	9.26	5.55	3.09	0.14	8.98	9.27	2.44	2.2	0.41	6.17	99.96				197.7	691	48.92	288.6				44.57	1163	19.39	172.8	6.24		1937	70.62	148.7	14.49	56.28	8.45	2.27	6.84	0.7	4.02	0.78	2.26	0.3	1.82	0.26	3.69	0.55
Ma et al. (2014b)	Jiaobei terrain	LL-03	49.28	0.79	13.2	8.87	5.66	2.58	0.12	9.89	9.02	2.3	1.94	0.04	5.03	99.85				172	584	39.22	219.2				40.77	979	16.85	141.9	6.13		1350	49.19	106.7	10.55	39.52	5.99	1.68	5.25	0.52	3.42	0.64	1.86	0.22	1.59	0.2	3.29	0.39
Ma et al. (2014b)	Jiaobei terrain	LL-08	49.59	0.61	13.1	8.01	4.83	2.64	0.11	7.44	9.42	2.76	2.24	0.29	6.86	99.89				143.8	402	33.11	197.4				50.88	721	15.58	155	6.09		1208	50.87	111.5	10.47	37.07	5.75	1.57	4.81	0.51	3.09	0.64	1.83	0.24	1.57	0.21	3.37	0.47
Ma et al. (2014b)	Jiaobei terrain	LL-01	53.19	0.65	14.52	8.13	5.9	1.57	0.11	8.44	7.13	3.24	2.5	0.06	2.59	99.91				155.1	473	35.62	204.6				56.55	892	15.75	146.2	5.1		1524	50.96	100.6	10.11	37.48	5.75	1.64	4.86	0.5	3.1	0.62	1.82	0.23	1.56	0.2	3.34	0.33
Wang et al. (2005)	Dabie-Sulu	99HS-14	50.21	1.42	15.74		6.39	2.36	0.12	6.71	5.32	2.76	3.81	0.88	3.61	99.33			161	239	39.5	100	107				107	358	26.2	302	19.58		1401	55	110.6	12.24	45.67	9.56	2.15	7.39	1.02	5.59	1.09	2.86	0.37	2.5	0.37	7.32	0.96
Wang et al. (2005)	Dabie-Sulu	01DB-162	51.54	1.38	14.72		5.58	3.04	0.15	6.67	7.61	2.63	3.46	0.93	2.74	100.45			186	196	45	76.5	80				80	792	27.7	339	14.89		2424	53	107	12.3	53.02	10.74	2.58	7.82	1.11	5.74	1.17	2.83	0.39	2.79	0.35	8.41	0.75
Wang et al. (2005)	Dabie-Sulu	01DB-134	52.71	1.32	14.78		5.57	1.9	0.14	6.19	6.86	3.02	3.73	0.55	3.12	99.89			16.7	105	273	39.8	35.2				73	575	22	227	13.46		1208	34	68	7.45	30.48	5.96	1.79	5.26	0.78	4.61	0.88	2.25	0.32	2.26	0.26	4.74	1.18
Wang et al. (2005)	Dabie-Sulu	99HS-13	49.14	1.42	15.26		5.16	3.14	0.11	6.85	5.75	3.05	3.31	0.88	5.6	99.67			185	142	32.2	64.4	102				102	709	22.6	300	19.6		1550	53.6	109.1	12.33	45.01	9.21	2.35	6.94	0.89	5.29	0.88	2.48	0.3	1.96	0.28	7.42	1.03
Wang et al. (2005)	Dabie-Sulu	01DB-138	52.22	1.36	14.7		5.82	1.67	0.16	6.34	6.63	3.1	3.09	0.55	4.12	99.76			121	299	43	55.7	64				64	534	25	223	13.53		675	37.2	72.6	8.21	33.67	6.42	1.99	5.28	0.85	4.86	1.02	2.56	0.33	2.5	0.28	4.9	1.24
Wang et al. (2005)	Dabie-Sulu	01DB-136	51.51	1.34	14.88		5.57	1.96	0.14	6.32	6.44	3.47	2.97	0.56	4.59	99.75			16.8	115	268	42	50.9				61	520	22.2	218	13.67		942	35.4	70.4	7.77	32.27	6.14	1.84	5.15	0.76	4.48	0.94	2.22	0.32	2.15	0.31	4.67	1.12
Xu et al. (2004)	Luxi-EM2	YN-23	52.25	1.19	16.11			8.51	0.13	6	8.65	3.6	3.33	0.72	0.33	100.82				133	245	19.7	67.1		22.7		104.8	870	14.7	109	6.3		984	22	44.2	5.37	21.88	4.11	1.11	3.46	0.5	2.83	0.56	1.51	0.23	1.41	0.23	3.01	0.84
Xu et al. (2004)	Luxi-EM2	YN-31	51.76	1	14.36			8.61	0.14	7.52	9.47	3.33	2.97	0.74	0.58	100.48				163	290	31.8	116		21		62.9	1461	26	303	13.9		1282	131.3	251	28.94	108.4	15.86	3.74	8.66	1.13	5.44	0.95	2.52	0.33	2.01	0.29	7.5	0.91
Xu et al. (2004)	Luxi-EM2	YN-26	50.24	0.98	14.4			9.46	0.15	8.81	10.64	2.83	1.74	0.77	0.9	100.92				172	328	37.1	127.2		18.7		38.2	1364	22.2	108	6.9		1700	84.5	167.9	21.41	82.28	12.35	3.15	7.33	1	4.86	0.84	2.17	0.29	1.71	0.25	3.08	0.45
Xu et al. (2004)	Luxi-EM2	YN-25	50.84	1.04	15.69			9.21	0.14	6.9	10.16	3.36	2.06	0.86	0.84	101.1				216	183	31.9	78.5		20.9		37.9	1749	22	191	8.2		1512	108.8	209.5	24.74	93.78	13.72	3.74	7.39	1.01	4.73	0.8	2.08	0.26	1.59	0.24	4.81	0.44
Xu et al. (2004)	Luxi-EM2	YN-29	55.17	0.92	15.13			7.54	0.12	6.52	8.44	3.79	2.09	0.54	0.43	100.69				143	212	27.3	101		21		32.7	1422	18.2	155	7.2		1527	74.9	145.8	17.48	67.14	9.9	2.66	6	0.8	3.99	0.69	1.77	0.25	1.5	0.22	4.05	0.42
Xu et al. (2004)	Luxi-EM2	YN-27	50.93	0.87	14.31			9.12	0.15	8.92	10.46	2.91	1.5	0.65	0.71	100.53				162	364	36.9	135.4		18.6		29.5	1491	19.2	79	5.9		1506	78.3	154.9	18.82	72.9	10.93	2.96	6.64	0.89	4.27	0.72	1.89	0.24	1.38	0.21	2.33	0.33
Xu et al. (2012)	Dabie-Sulu	04-153-4	48.59	1.58	16.25		5.45	3.22	0.15	7.09	4.63	2.15	4.11	0.9	5.26	99.38			17.55	209.16	249.98		74.9				137.33	768.7	26.27	233.75	12.72		4341	90.15	166.13	19.98	75.03	12.03	3.71	9.85	1.25	5.88	1.09	2.75	0.4	2.19	0.33	5.96	0.8
Xu et al. (2012)	Dabie-Sulu	04-158-1	44.89	2.67	14.36		6.85	5.85	0.14	9.08	7.64	2.34	2.01	1.49	2.34	99.66			38.759	414.19	343.93		146.941				50.858	799.563	32.98	147.694	10.376		1033.06	48.414	106.369	13.747	58.644	11.459	3.245	10.371	1.301	7.143	1.333	3.305	0.405	2.344	0.293	3.93	0.67
Yang et al. (2012a)	Luxi-EM2	07YN09	51.54	1.151	14.31			8.31	0.141	7.79	8.68	3.09	2.76	0.665	1.09	99.527			22.09	165.631	268.957	29.706	107.063				54.743	1236.06	23.892	219.08	11.794		1847.71	107.363	233.872	27.9405	95.675	14.7849	3.396	10.807	1.183	5.215	0.906	2.1922	0.292	1.805	0.262	5.603	0.609
Yang et al. (2012a)	Luxi-EM2	07YN08	52.01	1.143	15.4			7.98	0.131	6.15	7.88	3.47	3.05	0.656	1.25	99.12			22.048	174.996	151.161	27.672	64.744				57.666	1363.36	23.716	204.81	10.997		1809.95	122.757	250.205	28.4253	97.0689	14.7323	3.2646	10.28	1.11	4.945	0.86	2.10476	0.29252	1.843	0.273	5.304	0.559
Yang et al. (2012a)	Luxi-EM2	07YN02	52.36	1.009	14.94			7.62	0.126	7.23	7.75	3.26	2.74	0.643	1.88	99.558			20.027	159.364	249.336	28.467	122.104				48.615	1240.39	20.318	178.756	9.26		1588.71	105.472	214.48	24.037	85.6415	13.0126	2.86758	8.5932	0.982	4.49698	0.785	1.8922	0.258	1.577	0.238	4.546	0.446
Yang et al. (2012a)	Luxi-EM2	07ZB03	52.02	1.018	12.09			9.35	0.149	9.2	6.77	2.99	2.32	0.393	3.11	99.41			21.12	183.521	470.799	32.666	156.816				47.39	559.359	15.744	122.958	7.314		675.448	27.05	57.688	7.25	29.5806	6.1697	1.674	5.057	0.682	3.475	0.6194	1.536	0.203	1.273	0.19	3.303	0.44
Yang et al. (2012a)	Luxi-EM2	07LW03	54.32	0.801	14.43			8.53	0.145	8.36	7.25	2.84	1.81	0.19	0.78	99.456			26.377	194.616	558.579	32.831	138.401				45.913	421.64	15.607	114.188	5.381		714.083	19.086	38.08	4.486	17.601	3.8531	1.109	3.396	0.516	2.89636	0.567	1.498	0.21662	1.312	0.192	2.972	0.306
Yang et al. (2012a)	Luxi-EM2	07ZB01	53.31	0.977	12.1			8.91	0.144	9.05	6.71	3.22	1.96	0.403	2.47	99.254			21.286	171.445	524.548	35.857	188.323				44.041	639.141	16.919	111.403	6.962		1074.84	26.501	56.281	7.05	28.6165	5.89778	1.6285	5.099	0.713	3.60808	0.644	1.648	0.23	1.387	0.203	2.942	0.396
Yang et al. (2012a)	Luxi-EM2	07ZB04	53.88	1.012	12.75			8.76	0.131	8.19	6.34	3.38	1.89	0.348	2.31	98.991			21.05	177.519	449.444	34.1	165.968				39.491	652.528	17.505	113.573	8.878		803.4	26.327	56.962	7.123	28.797	6.28262	1.762	5.183	0.721	3.74714	0.697	1.704	0.245	1.505	0.23278	3.152	0.54
Yang et al. (2012a)	Luxi-EM2	07ZB02	53.15	1.059	12.46			9.51	0.144	9.07	6.87	3.25	1.65	0.386	2.03	99.579			22.018	180.574	491.249	35.038	175.821				33.149	639.934	17.46	93.766	7.65		755.619	24.827	53.354	6.876	28.5553	6.10454	1.733	5.135	0.707	3.76404	0.671	1.674	0.234	1.426	0.20806	2.585	0.438
Yang et al. (2012a)	Luxi-EM2	07LW01	47.43	0.658	11.03			11.11	0.187	14.94	10.01	1.44	0.17	0.074	2.21	99.259			39.116	250.791	1317.97	59.077	316.259				1.256	433.242	12.949	20.848	1.54		169.957	5.646	14.069	2.204	10.3566	2.97966	0.95	2.832	0.446	2.54925	0.489	1.264	0.1799	1.065	0.1575	0.815	0.071
Yang et al. (2012a)	Luxi-EM2	07LW05	48.02	0.559	12.22			10.83	0.2	14.2	9.82	0.91	0.08	0.111	2.03	98.98			37.535	253.331	1256.24	51.387	274.511				0.648	471.197	10.912	12.756	1.049		90.515	3.795	9.734	1.595	7.6283	2.22789	0.729	2.23276	0.35	2.08655	0.412	1.089	0.166	1.061	0.1632	0.508	0.04182
Yang et al., (2012b)	Luxi-EM2	FX2-89	48.41	1.09	11.49			8.85	0.11	13.91	8.88	1.75	2.94	0.66	1.45	99.54				145	866	49.6	477				51.8	1455	25.8	234	12.3		2318	133	262	24.7	98.7	15.8	4.14	13.33	1.4	6.09	0.89	2.31	0.27	1.76	0.26	5.27	0.57
Yang et al., (2012b)	Luxi-EM2	SFX-13	48.61	1.1	11.77			8.85	0.12	13.61	8.78	1.93	2.62	0.66	1.48	99.53				151	703	46.7	456				56.5	1484	28.9	235	12.3		2126	100	195	22.5	88.9	14.1	3.58	9.07	1.2	5.21	0.79	1.96	0.24	1.64	0.22	4.63	0.54
Yang et al., (2012b)	Luxi-EM2	SFX-27	49.18	1.07	11.92			8.75	0.12	13.02	8.74	2.18	2.72	0.64	0.94	99.28				152	667	45	424				55.2	1551	24.2	242	12.9		2233	104	200	23	91.2	14.3	3.66	9.3	1.23	5.3	0.81	2.01	0.25	1.73	0.23	4.77	0.59
Yang et al., (2012b)	Luxi-EM2	SFX-19	48.68	1.1	11.96			8.86	0.12	13.42	8.79	2.23	2.62	0.64	1.44	99.86				151	681	46.3	453				50.6	1493	37.6	239	12.6		2154	102	198	23.1	90.3	14.4	3.65	9.43	1.26	5.42	0.83	2.06	0.25	1.77	0.23	4.86	0.59
Yang et al., (2012b)	Luxi-EM2	SFX-28	49.47	1.07	11.86			8.74	0.12	13.06	8.76	2.19	2.53	0.65	1.07	99.52				150	671	45.3	426				32.6	1511	22.8	240	12.6		2130	101	194	22.2	86.7	13.8	3.48	8.91	1.18	5.1	0.77	1.89	0.23	1.64	0.21	4.63	0.56
Yang et al., (2012b)	Luxi-EM2	SFX-49	48.45	1.13	11.69			8.95	0.12	13.55	8.87	2.05	2.24	0.68	2.09	99.82				157	663	45.8	434				53.4	1531	24.8	233	12.7		2155	104	200	22.7	90.1	14.2	3.52	9.21	1.22	5.08	0.77	1.88	0.23	1.65	0.21	4.56	0.54
Yang et al., (2012b)	Luxi-EM2	SFX-02	48.83	1.09	12.07			8.94	0.12	12.7	8.82	2.37	2.29	0.68	1.52	99.43				157	609	44.3	401				43.5	1551	23	246	13		2248	106	206	23.8	93.6	14.7	3.78	9.48	1.25	5.45	0.82	2.03	0.25	1.77	0.23	4.85	0.59
Yang et al., (2012b)	Luxi-EM2	QT-1	53.2	1.05	15.79			7.69	0.1	6.37	8.42	3.33	3.04	0.68	0.15	99.82				188	211	29.6	83.7				69	1629	26.9	274	13.8		2075	121	236	24.4	94.3	14	3.75	11.71	1.23	5.49	0.83	2.16	0.27	1.78	0.27	5.55	0.65
Yang et al., (2012b)	Luxi-EM2	SFX-30	48.91	1.08	11.71			8.92	0.12	13.6	8.84	2.43	2.08	0.65	1.47	99.81				154	675	46.1	469				41.7	1468	22.5	225	12.5		2049	95	189	21.7	84.3	13.2	3.33	8.58	1.14	4.9	0.76	1.85	0.23	1.59	0.21	4.43	0.55
Yang et al., (2012b)	Luxi-EM2	FX2-88	48.29	1.08	11.45			8.99	0.12	14.57	8.75	2.45	2.01	0.66	1.26	99.63				142	863	50	519				44.7	1437	27.4	233	12		2310	132	262	24.6	98.2	15.7	4.1	13.13	1.38	5.98	0.88	2.26	0.27	1.79	0.25	5.27	0.57
Yang et al., (2012b)	Luxi-EM2	FX2-90	48.29	1.09	11.5			8.98	0.11	14.26	8.82	2.44	1.97	0.66	1.38	99.5				146	839	50.1	497				42.9	1436	31.4	233	12.1		2299	133	262	24.5	98.3	15.7	4.12	13.23	1.4	6.08	0.88	2.3	0.27	1.78	0.25	5.24	0.58
Yang et al., (2012b)	Luxi-EM2	FX2-1	49.41	1.08	11.72			9.88	0.15	12.9	8.97	2.59	2.08	0.67	0.75	100.2				150	590	45.3	416				33.5	1488	23.7	228	10.4		2075	101	215	25.2	93.3	14.4	3.55	8.5	1.15	5.12	0.85	2.13	0.27	1.68	0.25	5.2	0.54
Zhang et al. (2002)	Luxi-EM2	FC1-2	49.36	1.11	14.42			8.07	0.12	8.29	8.73	2.96	1.58	0.92	3.82	99.38											16	1380	32.79	306	18		1070	126.8	221.4	21.9	95	13.95	3.4	10.16	1.25	5.17	0.88	2.12	0.29	1.8	0.27	5.3	1.6
Zhang et al. (2002)	Luxi-EM2	FC1-1	49.62	1.12	14.76			7.49	0.12	8.09	8.79	3.16	1.59	0.94	4.22	99.9											12	1330	34.16	232	16		1050	126.7	205.4	24.9	95.6	15.08	3.99	11.7	1.57	6.54	1.2	2.62	0.36	2.23	0.35	6.8	1
Zhang et al. (2002)	Luxi-EM2	FC5-1	48.7	1.09	12.86			7.82	0.12	11.77	9.64	2.49	0.93	0.79	3.61	99.82											14	1230	32.11	198	11		1080	120.3	190.2	23.4	88.6	14.43	3.64	10.35	1.35	5.69	1.04	2.2	0.31	1.83	0.28	6.1	1
Zhang et al. (2002)	Luxi-EM2	FC6-2	47.62	1.14	13.01			7.77	0.11	11.38	9.94	2.71	1.01	0.88	4.07	99.64											15	1290	30.57	182	10		1090	128.9	218.9	25.2	96.6	15.48	3.8	10.96	1.38	5.82	1.1	2.31	0.33	2.07	0.33	5.7	0.7
Zhang et al. (2002)	Luxi-EM2	FC6-1	47.96	1.1	13.11			7.79	0.12	11.18	10.03	3.03	1.05	0.81	3.85	100.03											15	1290	32.57	188	8.5		1030	117.7	195	23.3	88.2	14.41	3.56	10.76	1.34	5.43	0.95	2.34	0.31	2.05	0.3	6	0.5
Zhang et al. (2002)	Luxi-EM2	FC7	48.47	1.11	12.68			8.23	0.1	11.46	9.77	2.67	0.92	0.79	3.59	99.79											16	1340	31.19	223	14		1020	115.3	236.8	22.2	92.3	14.54	3.54	10.49	1.54	5.85	0.9	2.21	0.29	1.62	0.25	5.4	0.9
Zhang et al. (2012)	Dabie-Sulu	00DP01	50.02	0.98	12.91			8.32	0.15	11.28	7.42	2.24	3.82	0.69	0.87	98.7			21.3	155	650	41.8	282		121		93.6	1158	25.8	325	15.3		3304	70.3	137	16.5	63.6	11.3	3.1	9.05	1.08	5.41	0.91	2.36	0.31	1.91	0.27	7.44	0.81
Zhang et al. (2012)	Dabie-Sulu	00XHY04	48.69	1.42	14.32			9.36	0.15	9.44	7.61	2.94	2.64	0.55	2.43	99.55			24.5	179	612	42.7	212		115		67.7	839	29.5	252	16.1		1896	49.1	96.1	11.7	46	8.67	2.46	7.77	1.06	5.84	1.06	2.94	0.4	2.44	0.34	5.47	0.95
Zhang et al. (2012)	Dabie-Sulu	00SD47	51.49	0.6	12.15			7.4	0.18	7.23	16.41	1.83	0.38	0.45	0.47	98.59			26.9	139	152	24.3	69		67		7.9	551	35.2	79	4.92		283	44.6	97.6	11.6	49.6	9.53	2.06	7.53	1.22	6.49	1.29	3.48	0.5	3.09	0.44	2.65	0.46
Zhang et al. (2012)	Dabie-Sulu	00SD03	47.75	1.07	13.61			9.4	0.07	8.29	5.49	5.2	0.76	0.53	8.25	100.42			23.1	155	539	34.5	214		52.8		19.4	618	21.7	274	12.1		984	96.4	169	18.3	62.7	9.33	2.28	7.56	0.89	4.53	0.79	2.25	0.31	1.88	0.27	6.07	0.7
Zhao et al. (2005)	Dabie-Sulu	01SHC08	50.26	0.83	7.17		7.95	2.83	0.18	14.35	12.05	1.25	1.08	0.15	1.4	99.5			48.9	217	522.3	68.3	247		79		33	262	17.2	88	3.8		413	16.78	34.55	4.86	19.87	4.74	1.35	4.47	0.71	3.73	0.66	1.84	0.25	1.51	0.21	2.6	<0.5
Zhao et al. (2005)	Dabie-Sulu	01SHC11	51.83	1.17	11.91		6.5	2.58	0.12	11.22	6.86	2.56	2.08	0.47	2.06	99.36			18.4	153	741.4	46.6	265		83		56	594	19.67	156	10.1		1102	47.7	96.29	12.81	45.4	8.35	2.17	6.33	0.86	4.21	0.79	1.96	0.29	1.67	0.24	3.7	0.5
Zhao et al. (2005)	Dabie-Sulu	01SHC10	52.01	1.19	12.72		6.13	2.13	0.12	10.83	6.82	2.75	2.16	0.4	2.13	99.39			18.5	152	752.7	42.7	260		80		57	743	16.95	194	9.6		1194	42.02	83.7	10.76	38.93	7.23	1.94	5.57	0.75	3.69	0.7	1.72	0.25	1.46	0.22	4	<0.5
Zhao et al. (2005)	Dabie-Sulu	01SHC09	44.45	1.59	6.23		9.98	6.78	0.2	14	12.33	1.07	0.74	0.12	1.7	99.19			47.3	485	357.1	78.9	185		110		14	189	17.47	77	3.2		313	14.08	31.29	4.91	19.45	4.94	1.35	4.68	0.71	3.76	0.68	1.89	0.26	1.54	0.22	2.4	<0.5
Zhao et al. (2005)	Dabie-Sulu	01SHC02	40.15	2.44	13.68		7.58	6.36	0.14	10.13	12.59	1.62	0.98	1.34	2.65	99.66			39.4	424	249.9	53.7	101		87		9	712	38.35	74	9.6		409	26.1	73.46	12	57.82	13.45	3.8	12.3	1.73	8.7	1.52	4.07	0.54	2.7	0.39	3	<0.5
Zhao et al. (2005)	Dabie-Sulu	01SC02	45.38	1.27	7.21		10.33	3.52	0.18	15.19	11.24	1.27	0.69	0.04	2.77	99.09			48.1	386	315.3	67.3	163		88		10	169	12.53	74	3.9		355	11.32	25.28	3.56	15.25	3.45	0.97	3.37	0.53	2.73	0.5	1.41	0.2	1.12	0.16	2	<0.5
Zhao et al. (2005)	Dabie-Sulu	01SHC03	42.78	3.23	9.7		9.35	5.99	0.14	12.17	11.7	1.78	0.95	0.09	1.76	99.64			76.5	702	271.8	86	136		95		6	431	24.09	75	5.8		474	12.9	37.88	5.97	28.81	7.11	2.16	7.27	1.09	5.58	0.99	2.67	0.38	1.88	0.26	2.4	<0.5
Li et al. (2021)	Dabie-Sulu	17DB02	50.46	0.95	13.36	7.5	4.38		0.11	7.8	5.45	1.61	4.03	0.42	6.77	98.46			18	142	340	34	201			17.4	148.5	704	18.3	196	10.3	19.65	2340	42.2	84	8.93	33.9	6.01	1.73	4.79	0.63	3.69	0.66	1.8	0.24	1.59	0.22	5	0.9
Li et al. (2021)	Dabie-Sulu	17DB03	50.9	0.96	13.37	7.52	4.74		0.11	7.94	5.14	1.39	4.27	0.43	6.54	98.57			18	148	364	34	209			16.9	136.5	682	17.8	189	9.9	17.8	2500	42.2	83.3	8.92	33.9	5.95	1.73	5.12	0.62	3.66	0.67	1.77	0.23	1.51	0.23	5	0.7
Li et al. (2021)	Dabie-Sulu	XH02-133	45.98	2.07	16.43	4.37	7.9		0.18	6.43	7.98	3.07	2.75	0.95	1.51	99.62			22	226	29	44	37			22	68	997	32	77	20	0.88	1647	55	125	15	64	13	3.4	10	1.33	6.9	1.16	3	0.37	2.2	0.32	2	0.9
Note: All the collect data have MgO > 6 wt% to represent near-primary mantle-derived melts
References
Cai, Y.-C., Fan, H.-R., Santosh, M., Liu, X., Hu, F.-F., Yang, K.-F., Lan, T.-G., Yang, Y.-H., & Liu, Y. (2013). Evolution of the lithospheric mantle beneath the southeastern North China Craton: Constraints from mafic dikes in the Jiaobei terrain. Gondwana Research, 24(2), 601-621. https://doi.org/10.1016/j.gr.2012.11.013
Cai, Y.-C., Fan, H.-R., Santosh, M., Hu, F.-F., Yang, K.-F., & Hu, Z. (2015). Subduction-related metasomatism of the lithospheric mantle beneath the southeastern North China Craton: Evidence from mafic to intermediate dykes in the northern Sulu orogen. Tectonophysics, 659(Supplement C), 137-151. https://doi.org/10.1016/j.tecto.2015.07.037
Dai, L. Q., Zhao, Z. F., Zheng, Y. F., Li, Q. L., Yang, Y. H., & Dai, M. N. (2011). Zircon Hf-O isotope evidence for crust-mantle interaction during continental deep subduction. Earth and Planetary Science Letters, 308(1-2), 229-244. 10.1016/j.epsl.2011.06.001
Deng, J., Liu, X., Wang, Q., Dilek, Y., & Liang, Y. (2017). Isotopic characterization and petrogenetic modeling of Early Cretaceous mafic diking—Lithospheric extension in the North China craton, eastern Asia. GsA Bulletin, 129(11-12), 1379-1407. https://doi.org/doi.org/10.1130/B31609.1
Fan, W. M., Guo, F., Wang, Y. J., Lin, G., & Zhang, M. (2001). Post-orogenic bimodal volcanism along the Sulu orogenic belt in Eastern China. Physics and Chemistry of the Earth, Part A: Solid Earth and Geodesy, 26(9), 733-746. https://doi.org/10.1016/S1464-1895(01)00123-5
Guo, F., Fan, W., Wang, Y., & Zhang, M. (2004). Origin of early Cretaceous calc-alkaline lamprophyres from the Sulu orogen in eastern China: implications for enrichment processes beneath continental collisional belt. Lithos, 78(3), 291-305. https://doi.org/10.1016/j.lithos.2004.05.001
Guo, F., Fan, W., Li, C., Wang, C. Y., Li, H., Zhao, L., & Li, J. (2014). Hf–Nd–O isotopic evidence for melting of recycled sediments beneath the Sulu Orogen, North China. Chemical Geology, 381, 243-258. 10.1016/j.chemgeo.2014.04.028
Jahn, B., Wu, F., Lo, C. H., & Tsai, C. H. (1999). Crust–mantle interaction induced by deep subduction of the continental crust: geochemical and Sr–Nd isotopic evidence from post-collisional mafic–ultramafic intrusions of the northern Dabie complex, central China. Chemical Geology, 157(1), 119-146.
Li, S., Nie, Y., Liu, D., & Zheng, S. (1998). Interaction between subducted continental crust and the mantle - Ⅰ. Major and trace element geochemistry of the syncollisional mafic-ultramafic intrusions in the Dabie Mountains. Science in China Series D-Earth Sciences, 41(5), 545-552.
Liang, Y., Liu, X., Qin, C., Li, Y., Chen, J., & Jiang, J. (2017). Petrogenesis of early cretaceous mafic dikes in southeastern Jiaolai basin, Jiaodong Peninsula, China. International Geology Review, 59(2), 131-150. https://doi.org/10.1080/00206814.2016.1213666
Liu, S., Zou, H., Hu, R., Zhao, J., & Feng, C. (2006). Mesozoic mafic dikes from the Shandong Peninsula, North China Craton: Petrogenesis and tectonic implications. Geochemical Journal, 40(2), 181-195. 10.2343/geochemj.40.181
Liu, S., Hu, R., Gao, S., Feng, C., Qi, Y., Wang, T., Feng, G., & Coulson, I. M. (2008). U–Pb zircon age, geochemical and Sr–Nd–Pb–Hf isotopic constraints on age and origin of alkaline intrusions and associated mafic dikes from Sulu orogenic belt, Eastern China. Lithos, 106(3–4), 365-379. http://dx.doi.org/10.1016/j.lithos.2008.09.004
Liu, S., Hu, R., Gao, S., Feng, C., Yu, B., Feng, G., Qi, Y., Wang, T., & Coulson, I. M. (2009). Petrogenesis of Late Mesozoic mafic dykes in the Jiaodong Peninsula, eastern North China Craton and implications for the foundering of lower crust. Lithos, 113(3), 621-639. http://dx.doi.org/10.1016/j.lithos.2009.06.035
Liu, S., Feng, C., Hu, R., Zhai, M., Gao, S., Lai, S., Yan, J., Coulson, I. M., & Zou, H. (2015). Zircon U–Pb geochronological, geochemical, and Sr–Nd isotope data for Early Cretaceous mafic dykes in the Tancheng–Lujiang Fault area of the Shandong Province, China: Constraints on the timing of magmatism and magma genesis. Journal of Asian Earth Sciences, 98, 247-260. https://doi.org/10.1016/j.jsea…
Liu, X., Deng, J., Liang, Y., Wang, Q., Li, G., Ma, Y., Xu, L., & Lu, Y. (2019). Geochemical, mineralogical and chronological studies of mafic-intermediate dykes in the Jiaodong Peninsula: implications for Late Mesozoic mantle source metasomatism and lithospheric thinning of the eastern North China Craton. International Geology Review, 1-22. https://doi.org/10.1080/00206814.2019.1692253
Long, Q., Hu, R., Yang, Y.-Z., Yang, C.-Y., Zhou, S., Siebel, W., & Chen, F. (2017). Geochemistry of Early Cretaceous Intermediate to Mafic Dikes in the Jiaodong Peninsula: Constraints on Mantle Source Composition beneath Eastern China. The Journal of Geology, 125(6), 713-732. https://doi.org/10.1086/693860
Ma, L., Jiang, S.-Y., Hofmann, A. W., Dai, B.-Z., Hou, M.-L., Zhao, K.-D., Chen, L.-H., Li, J.-W., & Jiang, Y.-H. (2014a). Lithospheric and asthenospheric sources of lamprophyres in the Jiaodong Peninsula: A consequence of rapid lithospheric thinning beneath the North China Craton? Geochimica et Cosmochimica Acta, 124, 250-271. https://doi.org/10.1016/j.gca.2013.09.035
Ma, L., Jiang, S.-Y., Hou, M.-L., Dai, B.-Z., Jiang, Y.-H., Yang, T., Zhao, K.-D., Pu, W., Zhu, Z.-Y., & Xu, B. (2014b). Geochemistry of Early Cretaceous calc-alkaline lamprophyres in the Jiaodong Peninsula: Implication for lithospheric evolution of the eastern North China Craton. Gondwana Research, 25(2), 859-872. https://doi.org/10.1016/j.gr.2013.05.012
Wang, Y., Fan, W., Peng, T., Zhang, H., & Guo, F. (2005). Nature of the Mesozoic lithospheric mantle and tectonic decoupling beneath the Dabie Orogen, Central China: Evidence from 40Ar/39Ar geochronology, elemental and Sr–Nd–Pb isotopic compositions of early Cretaceous mafic igneous rocks. Chemical Geology, 220(3-4), 165-189. 10.1016/j.chemgeo.2005.02.020
Xu, Y. G., Ma, J. L., Huang, X. L., Iizuka, Y., Chung, S. L., Wang, Y. B., & Wu, X. Y. (2004). Early cretaceous gabbroic complex from Yinan, Shandong Province: Petrogenesis and mantle domains beneath the North China Craton. International Journal of Earth Sciences, 93(6), 1025-1041. 10.1007/s00531-004-0430-7
Yang, Q.-L., Zhao, Z.-F., & Zheng, Y.-F. (2012a). Slab–mantle interaction in continental subduction channel: Geochemical evidence from Mesozoic gabbroic intrusives in southeastern North China. Lithos, 155, 442-460. http://dx.doi.org/10.1016/j.lithos.2012.10.003
Yang, Q.-L., Zhao, Z.-F., & Zheng, Y.-F. (2012b). Modification of subcontinental lithospheric mantle above continental subduction zone: Constraints from geochemistry of Mesozoic gabbroic rocks in southeastern North China. Lithos, 146, 164-182. http://dx.doi.org/10.1016/j.lithos.2012.05.005
Zhang, J., Zhao, Z.-F., Zheng, Y.-F., Liu, X., & Xie, L. (2012). Zircon Hf–O isotope and whole-rock geochemical constraints on origin of postcollisional mafic to felsic dykes in the Sulu orogen. Lithos, 136–139, 225-245. http://dx.doi.org/10.1016/j.lithos.2011.06.006
Zhao, Z.-F., Zheng, Y.-F., Wei, C.-S., Wu, Y.-B., Chen, F., & Jahn, B.-m. (2005). Zircon U–Pb age, element and C–O isotope geochemistry of post-collisional mafic-ultramafic rocks from the Dabie orogen in east-central China. Lithos, 83(1–2), 1-28. http://dx.doi.org/10.1016/j.lithos.2004.12.014
Li, S.-Q., Schmitt, A.K., Chen, F., 2021. Early Cretaceous mafic–intermediate dykes in the Dabie orogen as indicators for post-collisional lithosphere removal. Lithos 388-389, 106065.
[truncated: 5 more columns]

## Sheet: Alpine-Himalayan rocks
TABLE S3. MAJOR AND TRACE ELEMENT DATA OF THE ALPINE-HIMALAYAN ULTRAPOTASSIC ROCKS
Data sources	Locality	Sample	SiO2	TiO2	Al2O3	Fe2O3	MnO	MgO	CaO	Na2O	K2O	P2O5	LOI	Sum	Li	Sc	V	Cr	Ni	Rb	Sr	Y	Zr	Nb	Cs	Ba	La	Ce	Pr	Nd	Sm	Eu	Gd	Tb	Dy	Ho	Er	Tm	Yb	Lu	Hf	Ta	Pb	Th	U
Peccerillo et al. (1988)	Circum-Mediterranean	SIS 02	58.63	2.35	10.8	5.12889	0.08	6.47	3.15	0.88	10.7	0.71	1.91	100.809			93	421	254	376	847	27	1302	64		1329	193	344																43
Peccerillo et al. (1988)	Circum-Mediterranean	SIS 04	58.5	2.27	10.84	3.49889	0.06	6.63	3.12	1.02	10.73	0.67	2.09	99.4289	22	11.5	84	340	230	318	640	19.4	1040	54.8	2	1450	183	367	41.6	146	19.1	3.5	11.3	1.09	4.64	0.79	2.1	0.276	1.59	0.211	32.1	3.96	12	37.9	4.61
Peccerillo et al. (1988)	Circum-Mediterranean	SIS 07	58.29	2.31	10.82	5.36222	0.07	7.05	2.93	1.01	10.35	0.76	2.14	101.092	35	12.965	92.4275	411	272	317.005	681.27	16.2525	995.898	57.8275	2.6275	925.028	135.015	301.695	33.3675	125.052	16.29	2.6455	8.1725	1.01	3.96	0.75	1.46775	0.21	1.258	0.18475	26.565	4.1	14.37	36.82	4.2875
Peccerillo et al. (1988)	Circum-Mediterranean	SIS 08	57.89	2.37	10.47	4.97	0.08	6.38	3.64	1.06	10.49	0.82	2.07	100.24		9.8	89	425	271	343	812	26	1351	66	5.9	1267	183	302		111	19	2.5		0.8					1.1		25	3		41	5.5
Peccerillo et al. (1988)	Circum-Mediterranean	SIS 10	56.73	2.27	10.6	4.66666	0.07	7.13	3.65	1.1	10.46	0.64	2.96	100.277			89	425	239	370	839	28	1257	61		1235	188	337
Peccerillo et al. (1988)	Circum-Mediterranean	SIS 11	57.83	2.15	10.65	4.65444	0.07	6.88	3.53	1.3	10.15	0.66	2.69	100.564			85	400	283	342	847	25	1384	66		1230	188	333																53
Peccerillo et al. (1988)	Circum-Mediterranean	SIS04	58.5	2.27	10.84	3.472	0.06	6.63	3.12	1.02	10.73	0.67			35.22	12.965	92.4275	529.582	322.423	317.005	681.27	16.2525	995.898	57.8275	2.6275	925.028	135.015	301.695	33.3675	125.052	16.29	2.6455	8.1725		3.96		1.46775		1.258	0.18475	26.565	3.1	25	36.82	4.2875
Prelević et al. (2008)	Circum-Mediterranean	03CX02	55.47	1.51	8.95	5.45	0.08	11.88	3.88	0.89	8.94	1.21	1.23	99.67	44.3175	15.33	91.0425	800.212	583.07	622.842	917.673	28.6125	738.683	51.4575	24.4425	1551.48	114.745	320.345	43.66	194.435	35.165	5.5375	17.1575		7.08		2.5525		2.031	0.29875	20.81	3.235	74.82	117.608	14.9025
Prelević et al. (2008)	Circum-Mediterranean	03CX04	55.97	1.54	9.09	5.34	0.08	10.89	3.57	0.72	8.97	1.07	1.46	98.854	52.4775	15.1475	95.2825	865.525	573.205	657.78	801.705	25.92	760.438	49.35	17.9075	1885.98	103.957	298.35	40.5125	181.955	32.7775	5.1	15.7875		6.455		2.305		1.91425	0.26875	21.22	3.1575		111.405	18.53
Prelević et al. (2008)	Circum-Mediterranean	03CX06	55.48	1.54	9.04	5.38	0.08	11.26	3.51	0.88	9.01	1.07	0.83	98.244	36.155	14.8375	79.5175	649.205	488.62	589.555	784.962	27.7725	783.655	48.0475	14.53	1719.09	108.065	280.005	40.27	180.785	33.275	5.1575	16.5175		6.9		2.4775		2.12875	0.2955	22.1425	3.23		118.683	20.9175
Prelević et al. (2008)	Circum-Mediterranean	03CX07	55.5	1.55	9.24	5.26	0.07	10.55	3.08	1.27	7.19	0.97	4.06	98.892	64.525	13.8475	93.385	602.15	550.97	1117.55	677.745	24.575	725.438	46.1975	60.515	1696.73	98.3525	291.337	39.2325	175.035	31.1175	4.8525	14.7175		6.095		2.1525		1.91275	0.26725	20.065	2.9225		98.84	28.9875
Prelević et al. (2008)	Circum-Mediterranean	05MVC01	54.56	1.19	11.85	5.87	0.08	7.14	3.88	1.01	7.49	1.16	4.43	98.737	78.3975	20.6775	151.35	475.52	143.518	872.005	447.025	24.6725	511.01	37.965	14.5	1297.98	71.92	200.155	27.695	129.77	22.41	3.4025	11.1		5.5125		2.2525		2.075	0.305	14.3475	2.129	35	117.535	24.7925
Prelević et al. (2008)	Circum-Mediterranean	05MVC02	54.45	1.24	12.24	6.16	0.07	7.34	3.89	1.04	7.88	1.18	3.41	98.967	79.395	22.075	168.9	555.268	151.67	816.622	378.923	24.0825	469.803	35.955	13.1175	1255.84	72.925	201.357	27.8775	126.903	22.035	3.165	10.9125		5.3575		2.18825		2.052	0.29475	13.1625	1.9705	32	109.18	23.125
Prelević et al. (2008)	Circum-Mediterranean	05OR01	56.56	1.34	11.21	5.54	0.08	7.13	4.46	1.25	7.51	0.65	3.06	98.89	65.445	19.345	115.323	484.39	268.365	679.602	652.065	23.3975	808.79	50.265	18.425	1203.79	140.72	355.58	46.3975	193.47	27.415	3.88	11.645		5.355		2.20725		1.898	0.2805	23.325	3.185	39	123.38	18.93
Prelević et al. (2008)	Circum-Mediterranean	05OR02	56.48	1.34	11.23	5.54	0.08	7.18	4.43	1.26	7.51	0.65	2.98	98.774	75.3025	20.9525	126.362	551.212	263.683	654.702	600.543	22.2025	738.658	44.5625	17.8675	1100.05	129.775	336.132	43.475	183.22	25.61	3.6225	11.1875		5.015		2.07425		1.81175	0.25775	21.055	2.5975	36	107.515	18.1725
Prelević et al. (2008)	Circum-Mediterranean	05OR03	55.93	1.24	10.71	4.99	0.07	8.35	4.57	1.13	6.97	0.58	5	99.663				437	344	553	541	19	681	35		1033																	33	95	15.9
Prelević et al. (2008)	Circum-Mediterranean	05RR01	50.23	1.06	10.21	7.19	0.12	11.11	6.75	0.67	7.19	1.12	2.29	98.097	41.165	27.2325	162.912	779.605	366.27	408.44	821.05	32.6775	732.875	50.0925	12.3	4406.28	124.85	300.48	40.8225	183.335	36.4975	5.8625	18.3775		7.905		2.6925		2.145	0.29075	19.135	2.57	132	162.53	31.7425
Prelević et al. (2008)	Circum-Mediterranean	05RR02	49.61	1.18	11.3	7.31	0.11	11.82	8.35	1.29	6.13	1.16	1.26	99.52	40.6	32.7	270.6	932.8	356.4	317.1	789.5	28.1	359.2	32.3	9.1	4399.6	123.57	291.7	37.62	166.25	31.63	5.34	16.43		7.02		2.35		1.84	0.25	9.81	1.6	32	125.6	22.3
Prelević et al. (2008)	Circum-Mediterranean	05RR02	49.61	1.18	11.3	7.31	0.11	11.82	8.35	1.29	6.13	1.16	1.26	99.663	40.5575	32.685	207.585	932.773	356.433	317.1	789.505	28.0825	359.2	32.3225	9.075	4399.57	123.57	291.74	37.6225	166.245	31.625	5.335	16.43		7.02		2.345		1.8395	0.253	9.805	1.5985	32	125.575	22.2675
Prelević et al. (2008)	Circum-Mediterranean	05RR02	49.61	1.18	11.3	7.31	0.11	11.82	8.35	1.29	6.13	1.16	1.26	99.663	40.5575	32.685	207.585	932.773	356.433	317.1	789.505	28.0825	359.2	32.3225	9.075	4399.57	123.57	291.74	37.6225	166.245	31.625	5.335	16.43		7.02		2.345		1.8395	0.253	9.805	1.5985	32	125.575	22.2675
Prelević et al. (2008)	Circum-Mediterranean	05TA01	55.2	1.28	12.51	6.32	0.09	8.5	5.32	0.86	7.4	0.54	1.46	99.603	60.9875	18.1625	137.938	616.947	326.587	525.59	746.64	27.87	605.735	38.3775	34.095	1402.31	117.468	276.103	33.4475	136.205	21.8975	3.495	12.2675		6.355		2.555		2.2825	0.331	17.1525	2.445	64	69.1925	14.38
Prelević et al. (2008)	Circum-Mediterranean	05TA02	55	1.24	13.88	6.66	0.09	7.42	5.17	0.86	6.26	0.44	0.66	97.784	40.3975	19.57	158.285	568.258	291.623	378.567	600.035	28.1975	515.092	36.465	28.8275	1154.59	89.75	216.565	26.305	107.028	17.37	3.0175	9.94		6.06		2.745		2.5275	0.37825	14.545	2.2705	49	53.685	11.18
Prelević et al. (2008)	Circum-Mediterranean	05VDA02	55.21	1.26	10.26	5.06	0.09	8.69	4.03	1.16	8.82	1.02	1.75	97.456		16	85	414	298	546	815	24	673	35		3116																	229	163.7	31.2
Prelević et al. (2008)	Circum-Mediterranean	05VdA02b	55.21	1.26	10.26	5.06	0.09	8.69	4.03	1.16	8.82	1.02	1.75	97.35		16	85	414	298.1	546	815	24	673	35		3116																	229	163.7	31.2
Prelević et al. (2008)	Circum-Mediterranean	05VdA03	54.83	1.24	10.1	4.89	0.08	8.7	4.25	1.13	8.6	1.03	3.27	98.12	93	15.3	91.2	507.3	308	606.6	847	27.9	665.4	40	29.1	3514.1	95.06	254.07	34.55	159.94	31.85	5.16	16.16		6.93		2.28		1.75	0.23	18.25	2.19	129	137.4	30.6
Prelević et al. (2008)	Circum-Mediterranean	05VDA03	54.83	1.24	10.1	4.89	0.08	8.7	4.25	1.13	8.6	1.03	3.27	98.23	93.04	15.2675	91.1625	507.25	308.142	606.577	846.982	27.91	665.408	39.9625	29.0925	3514.1	95.06	254.07	34.55	159.938	31.85	5.155	16.1575		6.93		2.275		1.746	0.23	18.2525	2.187	129	137.357	30.6075
Prelević et al. (2008)	Circum-Mediterranean	05VDA04	61.73	1.37	11.18	5.6	0.1	8.64	4.85	1.71	9.81	1.19	14.5	120.765		15		348	245	494	804	27	712	36		3493																	121	169.9	33.6
Prelević et al. (2008)	Circum-Mediterranean	MVC100	56.86	1.37	12.61	6.374	0.1	7.15	3.47	1.2	7.91	0.92			48.05	17.4	116.097	373.598	128.188	599.77	314.615	19.5675	344.385	26.1825	9.275	918.697	53.7125	152.265	21.4475	99.5925	17.7	2.746	8.7325		4.3175		1.766		1.57625	0.2185	9.485	1.40575	38.7	78.5925	17.07
Prelević et al. (2008)	Circum-Mediterranean	MVC100*	56.86	1.37	12.61	6.40555	0.1	7.15	3.47	1.2	7.91	0.92	2.43	100.426	39	20.2	137	380	140	768	408	28	491	30.1	14	1370	79.8	206	29.8	133	23.5	4.02	13.6	1.31	5.87	0.99	2.67	0.358	2.19	0.303	13.4	2.17	19	112	18.2
Prelević et al. (2008)	Circum-Mediterranean	03JB02	46.44	2.22	13.94	7.84	0.13	7.46	8.59	2.85	6.25	1.7	1.49	98.948	8.02667	24.48	177.377	167	147	342.423	1524.69	22.0967	423.663	30.81	5.57667	4102.35	117.683	232.287	26.8867	107.92	15.4967	3.57	8.54		4.74667		2.07667		1.90667	0.276667	11.0567	1.23	27	22.8167	3.47333
Prelević et al. (2008)	Circum-Mediterranean	03JB03	46.98	2.36	13.66	7.8	0.12	7.21	7.98	2.88	6.58	1.73	0.88	98.23	8.13333	23.64	168.407	187	153	414.363	1504.65	21.25	433.41	31.4967	7.14	4252.91	107.81	214.357	25.6	103.467	14.9267	3.51333	8.16667		4.63333		2		1.90667	0.296667	11.2633	1.25533	28	22.5767	4.55667
Prelević et al. (2008)	Circum-Mediterranean	03JB06	46.74	2.19	14.13	8.09	0.13	7.62	8.44	3.01	6.28	1.68	0.65	99.005	7.57667	25.27	174.6	160	143	283.297	1530.47	22.71	425.387	29.89	5.01333	4005.83	119.347	230.357	27.0233	109.24	15.8867	3.6	8.77		4.79667		2.15333		1.9	0.275	10.99	1.134	32	25.4867	2.95
Prelević et al. (2008)	Circum-Mediterranean	03JB07	46.05	2.23	13.81	7.69	0.12	7.02	8.69	2.93	6.36	1.68	1.49	98.118	6.0475	23.4025	174.485	168	146	359.737	1474.15	21.2925	385.715	32.8575	6.16667	3968.36	106.115	228.123	26.175	99.755	14.1575	3.035	8.1975		4.6325		2.0625		1.88	0.263	10.3675	1.47875	30	23.0275	4.115
Prelević et al. (2008)	Circum-Mediterranean	03KK01	49.68	1.43	11.29	7.31	0.12	9.38	8.74	1.29	6	1.44	2.77	99.511	11.165	27.655	165.195	382.165	117.465	224.173	957.183	20.165	440.158	26.6775	10.38	1975.31	54.0475	122.33	16.4325	68.21	10.3475	2.25025	6.505		4.1925		1.97		1.828	0.28325	11.945	1.27725	21	44.805	6.825
Prelević et al. (2008)	Circum-Mediterranean	03KK01	49.68	1.43	11.29	7.31	0.12	9.38	8.74	1.29	6	1.44	2.77	99.511	11.165	27.655	165.195	382.165	117.465	224.173	957.183	20.165	440.158	26.6775	10.38	1975.31	54.0475	122.33	16.4325	68.21	10.3475	2.25025	6.505		4.1925		1.97		1.828	0.28325	11.945	1.27725	21	44.805	6.825
Prelević et al. (2008)	Circum-Mediterranean	03KK02	49.77	1.46	11.43	7.38	0.12	9.23	8.28	2.08	6.26	1.45	2.84	100.387	10.6475	28.385	174.915	408.647	156.88	330.017	1075.01	21.5725	470.233	28.255	12.65	2316.84	60.67	136.713	17.8825	74.805	11.225	2.435	6.85		4.45		2.09		1.86825	0.2665	12.6525	1.45725	10.6275	45.8525	7.4975
Prelević et al. (2008)	Circum-Mediterranean	03KK03	49.76	1.44	11.32	7.5	0.13	9.3	8.57	2.01	6.01	1.45	1.94	99.507	11.2675	28.515	160.835	412.897	125.422	222.74	976.18	19.9425	411.305	23.99	9.605	2042.12	51.845	119.505	16.0275	67.7875	9.845	2.23275	6.32		4.1575		1.88025		1.70725	0.25025	11.17	1.17425	9.6525	39.2675	6.1325
Prelević et al. (2008)	Circum-Mediterranean	03KK04	49.31	1.37	11.04	7.28	0.12	9.66	8.48	1.55	6.09	1.48	2.6	99.052	9.3575	27.93	166.99	398.655	149.25	169.075	986.225	20.515	430.965	25.3875	8.295	2062.64	54.7925	124.213	16.78	70.335	10.59	2.3215	6.6125		4.2725		1.999		1.77275	0.2515	11.535	1.2365	23	42.9125	6.3775
Prelević et al. (2008)	Circum-Mediterranean	03KK04	49.31	1.37	11.04	7.28	0.12	9.66	8.48	1.55	6.09	1.48	2.6	99.052	9.3575	27.93	166.99	398.655	149.25	169.075	986.225	20.515	430.965	25.3875	8.295	2062.64	54.7925	124.213	16.78	70.335	10.59	2.3215	6.6125		4.2725		1.999		1.77275	0.2515	11.535	1.2365	23	42.9125	6.3775
Prelević et al. (2008)	Circum-Mediterranean	03KK06	49.11	1.4	11.1	7.26	0.12	9.31	8.53	2.31	4.76	1.41	3.05	98.446	12.025	26.39	176.315	395.618	109.245	280.31	953.055	17.5	415.155	25.18	18.5025	2027.76	46.495	106.123	14.1325	60.0775	8.94	2.0265	5.65		3.6875		1.76075		1.546	0.22025	11.23	1.2455	8.3575	41.2525	5.9775
Prelević et al. (2008)	Circum-Mediterranean	03MN01	48.12	1.18	12.23	7.91	0.13	9.16	7.81	2	6.96	1.6	1.2	98.396	9.56	26.55	168.343	392.82	266.74	257.235	1054.55	22.64	324.108	21.2325	11.6175	2528.33	35.7675	73.5775	9.475	40.8075	7.395	1.84475	6.25		4.5325		2.1685		2.08	0.3065	8.5125	1.0475	40	21.145	5.83
Prelević et al. (2008)	Circum-Mediterranean	03MN01	48.12	1.18	12.23	7.91	0.13	9.16	7.81	2	6.96	1.6	1.2	98.396	9.56	26.55	168.343	392.82	266.74	257.235	1054.55	22.64	324.108	21.2325	11.6175	2528.33	35.7675	73.5775	9.475	40.8075	7.395	1.84475	6.25		4.5325		2.1685		2.08	0.3065	8.5125	1.0475	9.3075	21.145	5.83
Prelević et al. (2008)	Circum-Mediterranean	03MN02	48.48	1.15	12.01	7.74	0.13	10.26	7.65	2.23	7.17	1.65	0.48	99.06	8.36	25.4825	156.303	361.618	241.518	243.702	1054.87	22.42	317.065	20.6525	10.845	2542.39	36.6125	76.0325	9.6775	41.465	7.7075	1.86125	6.2675		4.4525		2.2175		2.03	0.3125	8.445	1.0695	14.9225	21.96	5.325
Prelević et al. (2008)	Circum-Mediterranean	03MN03	48.56	1.13	12.31	7.92	0.14	9.84	7.84	2.52	6.76	1.59	0.4	99.097	8.5825	25.18	151.455	316.077	210.23	217.447	1113.38	23.6325	314.837	20.295	8.6425	2462.78	38.315	77.89	10.1025	42.855	8.16	1.9285	6.3725		4.6775		2.3575		2.09	0.321	8.365	1.006	1.69	21.73	4.4925
Prelević et al. (2008)	Circum-Mediterranean	03MN04	48.88	1.15	12.5	7.85	0.14	9.53	7.85	2.41	6.78	1.64	0.79	99.597	9.1475	25.925	165.982	404.745	240.607	257.377	1060.7	22.2525	315.993	21.2625	12.2925	2440.56	36.155	75.8325	9.63	41.665	7.5225	1.853	6.045		4.475		2.2025		2.1025	0.31825	8.125	0.98975	20.4525	20.63	6.105
Prelević et al. (2008)	Circum-Mediterranean	03MN05	47.55	1.11	11.6	7.37	0.12	9.91	7.9	1.47	6.18	1.57	3.63	98.491	10.7	24.8575	150.773	364.38	208.355	277.933	1185.95	21.2725	300.527	19.4975	13.315	2393.35	34.1625	71.4575	9.3025	40.08	7.3825	1.815	5.9225		4.3025		2.05		1.89275	0.27975	8.23	1.034	21.2	22.935	6.91
Prelević et al. (2008)	Circum-Mediterranean	03MN06	49.22	1.14	12.56	7.65	0.13	9.33	7.72	2.44	6.6	1.58	0.77	99.222	10.3475	25.5	156.618	380.04	213.955	284.385	1027.34	22.58	318.435	20.9825	13.73	2356.01	35.9	73.94	9.395	40.7525	7.57	1.8245	6.0975		4.3925		2.22		2.0175	0.292	8.385	1.04	27.4675	20.9475	6.145
Prelević et al. (2008)	Circum-Mediterranean	03MN07	48.93	1.18	12.38	7.75	0.14	9.44	7.71	2.28	6.91	1.64	0.76	99.227	9.54	24.4425	167.37	367.377	232.852	259.11	1080.45	22.525	307.675	21.21	13.9775	2579.46	37.5925	80.67	10.085	43.165	7.84	1.9585	6.2675		4.5475		2.2725		2.045	0.27475	8.1025	1.0475	42	24.665	8.4175
Prelević et al. (2008)	Circum-Mediterranean	03MN07	48.93	1.18	12.38	7.75	0.14	9.44	7.71	2.28	6.91	1.64	0.76	99.227	9.54	24.4425	167.37	367.377	232.852	259.11	1080.45	22.525	307.675	21.21	13.9775	2579.46	37.5925	80.67	10.085	43.165	7.84	1.9585	6.2675		4.5475		2.2725		2.045	0.27475	8.1025	1.0475	7.76	24.665	8.4175
Prelević et al. (2008)	Circum-Mediterranean	03MN08	48.71	1.17	12.32	7.81	0.13	9.51	7.75	2.35	6.81	1.64	0.77	99.066	10.34	25.635	167.255	380.58	233.042	266.983	1031.26	22.4575	307.038	20.815	14.7125	2421.61	36.4425	77.37	9.875	42.45	8.235	1.9035	6.285		4.3875		2.19		2.115	0.29225	8.3	1.086	9.7525	23.345	7.42
Prelević et al. (2008)	Circum-Mediterranean	03MN09	48.62	1.18	12.25	7.89	0.13	9.38	7.8	2.25	6.8	1.63	0.81	98.83	10.8625	26.2825	165.22	419.283	220.375	299.952	1040.13	22.24	298.345	19.96	19.7375	2417.51	35.9875	76.2525	9.665	42.0975	7.9075	1.8765	6.1675		4.4625		2.165		1.8625	0.312	7.9775	0.986	32.535	22.565	7.905
Prelević et al. (2008)	Circum-Mediterranean	03MN10	49.75	1.14	12.3	7.53	0.13	9.38	7.54	2.46	6.73	1.57	0.65	99.285	9.3725	24.0925	158.175	349.973	192.49	247.537	986.795	22.835	300.327	21.09	13.9775	2295.38	36.48	77.555	9.8325	42.225	7.9775	2.36	6.1025		4.415		2.28		2.065	0.30575	7.82	1.0955	13.075	24.0975	9.4525
Prelević et al. (2008)	Circum-Mediterranean	04GR02	53.58	1.12	13.01	6.58	0.12	7.43	6.17	2.69	5.89	1.06	0.89	98.622	7.765	21.2325	110.218	343.65	246.735	224.347	1451.76	24.4425	487.113	23.3525	3.815	2445.55	90.8425	200.113	26.0625	109	14.3225	3.1475	8.4725		4.9425		2.3675		2.245	0.318667	12.53	1.10225	16.16	64.2725	6.8075
Prelević et al. (2008)	Circum-Mediterranean	04GR03	53.24	1.09	12.59	6.69	0.13	8.39	6.36	2.8	5.65	1.05	1.06	99.154	10.8025	25.3975	123.627	386.127	298.95	215.673	1403.34	23.0875	436.548	20.86	9.4325	2325.78	87.25	199.06	25.655	105.665	13.995	3.155	8.0475		4.9325		2.1975		2.0625	0.287	11.165	0.9775	16.31	59.7925	5.945
Prelević et al. (2008)	Circum-Mediterranean	04GR04	53.58	1.12	13.01	6.58	0.12	7.43	6.17	2.69	5.89	1.06	0.89	98.622	7.765	21.2325	110.218	343.65	246.735	224.347	1451.76	24.4425	487.113	23.3525	3.815	2445.55	90.8425	200.113	26.0625	109	14.3225	3.1475	8.4725		4.9425		2.3675		2.245	0.318667	12.53	1.10225	30	64.2725	6.8075
Prelević et al. (2008)	Circum-Mediterranean	04GR05	52.71	1.2	11.99	7	0.13	9.01	6.55	2.64	5.65	1.19	0.75	98.929	8.58	25.4225	138.36	439.285	321.885	276.93	1423.74	24.7725	503.572	22.325	3.9575	2506.18	91.84	210.515	28.1175	119.27	15.7575	3.2975	9.085		5.09		2.42		2.2325	0.326	13.2175	1.0345	31	70.2725	6.9175
Prelević et al. (2008)	Circum-Mediterranean	04GR05	52.71	1.2	11.99	7	0.13	9.01	6.55	2.64	5.65	1.19	0.75	98.929	8.58	25.4225	138.36	439.285	321.885	276.93	1423.74	24.7725	503.572	22.325	3.9575	2506.18	91.84	210.515	28.1175	119.27	15.7575	3.2975	9.085		5.09		2.42		2.2325	0.326	13.2175	1.0345	31	70.2725	6.9175
Prelević et al. (2008)	Circum-Mediterranean	04KS01	47.3	1.19	13.12	9.03	0.16	9.47	9.52	2.53	5.21	1.64	1.83	101.039	10.1675	28.465	172.708	219.18	79.29	194.407	1323.82	27.9275	357.353	27.77	9.765	2397.76	59.34	118.892	15.035	62.6875	10.955	2.7925	8.445		5.8325		2.6625		2.44	0.358	9.3225	1.67325	47	29.525	7.1575
Prelević et al. (2008)	Circum-Mediterranean	04KS01	47.3	1.19	13.12	9.03	0.16	9.47	9.52	2.53	5.21	1.64	1.83	101.039	10.1675	28.465	172.708	219.18	79.29	194.407	1323.82	27.9275	357.353	27.77	9.765	2397.76	59.34	118.892	15.035	62.6875	10.955	2.7925	8.445		5.8325		2.6625		2.44	0.358	9.3225	1.67325	25.8925	29.525	7.1575
Prelević et al. (2008)	Circum-Mediterranean	04KS02	47.29	1.19	13.08	8.98	0.15	8.71	9.44	2.47	5.31	1.64	1.34	99.641	11.145	28.2225	182.125	227.537	91.2075	225.602	1308.32	27.515	339.675	26.84	8.535	2356.05	57.65	116.532	14.7725	61.6875	11.205	2.7025	8.325		5.77		2.64		2.325	0.3415	8.84	1.59425	43	27.49	5.0825
Prelević et al. (2008)	Circum-Mediterranean	04KS02	47.29	1.19	13.08	8.98	0.15	8.71	9.44	2.47	5.31	1.64	1.34	99.641	11.145	28.2225	182.125	227.537	91.2075	225.602	1308.32	27.515	339.675	26.84	8.535	2356.05	57.65	116.532	14.7725	61.6875	11.205	2.7025	8.325		5.77		2.64		2.325	0.3415	8.84	1.59425	20.2925	27.49	5.0825
Prelević et al. (2008)	Circum-Mediterranean	04ZBR01	48.35	1.16	12.06	7.78	0.13	9.9	8.53	2.17	6.63	1.65	0.11	98.563	10.9725	31.45	170.523	421.173	275.428	343.55	1105.04	22.26	313.895	22.1175	14.7075	2554.15	37.32	79.6	10.1875	43.8625	7.9625	2.084	6.355		4.48		2.15		2.0025	0.28925	8.0225	1.057	28	24.1525	5.8975
Prelević et al. (2008)	Circum-Mediterranean	04ZBR01	48.35	1.16	12.06	7.78	0.13	9.9	8.53	2.17	6.63	1.65	0.11	98.563	10.9725	31.45	170.523	421.173	275.428	343.55	1105.04	22.26	313.895	22.1175	14.7075	2554.15	37.32	79.6	10.1875	43.8625	7.9625	2.084	6.355		4.48		2.15		2.0025	0.28925	8.0225	1.057	6.73	24.1525	5.8975
Prelević et al. (2008)	Circum-Mediterranean	04ZBR02	46.55	1.16	11.68	7.74	0.13	10.24	8.21	1.89	6.22	1.61	3.79	99.306	9.5975	31.9525	143.382	421.36	248.28	251.415	994.775	22.23	295.175	19.6925	20.1275	2435.61	37.55	78.2625	10.1175	44.3675	8.31	2.07975	6.7325		4.715		2.195		1.947	0.295	7.81	0.98175	46.9225	24	7.64
Conticelli et al. (2015)	Circum-Mediterranean	05C02	42.14	1.09	7	7.43	0.11	10.79	13.71	0.06	6.34	1.19	8.73	98.59		20	54	43	83	584	4107	47	892	49		3984																	164	142.5	26.8
Conticelli et al. (2015)	Circum-Mediterranean	05C02	42.15	1.1	7.01	7.43	0.12	10.42	14.72	0.07	7.12	1.2	7.59	98.93	144.83	19.6075	39.67	61.34	89.3425	429.59	3896.77	50.3925	730.07	50.88	38.195	3239.82	251.752	542.365	60.0775	228.7	38.4575	6.945	24.7875		12.5075		3.865		2.585	0.33675	18.7225	2.78	21.6975	117.772	26.9425
Conticelli et al. (2015)	Circum-Mediterranean	05SV01	43.05	0.86	10.67	8.3	0.14	12.37	10.28	0.6	8.04	0.44	4.51	99.26	70.9375	28.4225	176.708	699.665	158.09	452.188	464.842	38.2925	389.457	18.315	20.365	685.222	91.8775	208.27	25.7875	104.903	19.2225	3.58	13.4575		8.455		3.3525		2.595	0.365	10.57	0.88775	5.945	42.2725	6.205
Conticelli et al. (2015)	Circum-Mediterranean	05SV02	40.73	0.7	10.04	7.37	0.12	12.73	15.94	0.8	7.82	0.35	3.25	99.85	69.3575	22.0375	147.745	557.638	123.138	406.553	1616.08	29.145	313.678	15.845	25.435	603.055	68.9775	160.495	19.675	80.005	14.2775	2.7175	10.08		6.4025		2.5		2.04525	0.289	8.115	0.69575	25.195	30.89	7.6375
Conticelli et al. (2015)	Circum-Mediterranean	05SV03	40.17	0.85	10.01	8.25	0.13	12.26	13.53	0.87	7.48	0.46	2.94	96.95	81.0525	26.24	184.425	707.335	140.055	403.173	1439.15	36.43	365.668	17.6375	24.245	753.288	87.03	208.15	24.8725	100.983	18.255	3.505	12.695		7.915		3.1225		2.4875	0.3325	9.3775	0.79475	16.0475	38.0525	9.67
Conticelli et al. (2015)	Circum-Mediterranean	05SV04	41.73	0.76	10.36	7.85	0.13	12.61	16.4	1.23	7.83	0.39	0.51	99.8	80.045	26.01	169.317	769.735	135.845	518.775	1908.86	34.785	337.985	17.1675	35.2375	752.433	82.4875	194.245	23.44	94.78	17.24	3.3775	12.1175		7.4025		2.8825		2.345	0.336	8.8325	0.773	21.98	37.5475	10.355
Conticelli et al. (2015)	Circum-Mediterranean	05C01	42.26	1.08	7.02	7.35	0.12	10.2	15.86	0.08	6.2	1.15	7.65	98.97		20	43	45	77	546	4067	51	882	49		4813																	156	143.1	29.7
Conticelli (1998)	Circum-Mediterranean	VS 38	45.66	1.34	9.86	6.52555	0.09	27.26	2.9	0.99	4.27	0.64	0.81	100.346		10		2438	2094	869	494	25	368	15		1160	79	178		98	17.7	2.16		0.71					0.73	0.13	8.8	1.6		46
Conticelli et al. (1997)	Circum-Mediterranean	BR 03	48.24	0.76	15.11	7.86777	0.14	7.23	11.35	1.07	6.99	0.53	1.17	100.458		34.3	251	250	74	627	1424	35	342	13	40	1537	94.3	224		99	19.1	3.7		1.5					2.4	0.43	7.9	0.85	41		9.3
Conticelli et al. (1997)	Circum-Mediterranean	BR 119	46.94	0.82	14.43	8.97777	0.15	6.89	12.5	0.56	7.11	0.55	1.3	100.228			271	134	92	498	1118	36	312	12		2103	149	258															51	45
Conticelli et al. (1997)	Circum-Mediterranean	BR 127	46.33	0.8	14.93	8.82888	0.14	6.89	12.93	0.59	6.72	0.61	1.72	100.489			278	146	88	508	1027	36	309	13		1703	140	228															52	52
Conticelli et al. (1997)	Circum-Mediterranean	BR 132	47.18	0.73	14.3	8.63889	0.15	8.39	11.38	1.12	7.08	0.31	0.9	100.179			245.833	315.686	123.456	521.568	1521.92	34.8161	258.47	9.46732		916.505	73.8667	165.411		81.1945													35.2481	32.6599	8.17979
Conticelli et al. (1997)	Circum-Mediterranean	BR 133	46.58	0.77	14.37	9.19333	0.17	8.45	11.5	1.11	6.81	0.27	1.08	100.303			237.827	307.016	127.582	514.568	1406.32	36.9525	267.457	9.07941		806.029	74.4191	178.422		82.5731													41.1821	32.893	8.40653
Conticelli et al. (1997)	Circum-Mediterranean	BR 136	45.0761	0.805106	14.0206	9.42563	0.157094	6.42121	13.5002	0.824742	7.79578	0.569465	1.43	100.026			270	60	71	502	1420	38	296	13		1441	124	257
Conticelli et al. (1997)	Circum-Mediterranean	BR 137	47.6331	0.808679	15.6805	8.055	0.147929	6.31164	11.4004	0.759369	7.57396	0.759369	1.3	100.43			237	169	60	445	1507	32	305	14		1234	106	225
Conticelli et al. (1997)	Circum-Mediterranean	BR 149	46.04	0.77	14.85	8.40778	0.15	8.88	11.18	0.73	7.43	0.43	1.37	100.238			234.219	145.62	88.5323	590.283	994.794	42.1624	289.453	10.4129		1238.6	89.571	202.154		92.3108													57.7596	39.487	6.37719
Conticelli et al. (1997)	Circum-Mediterranean	BR 150	46.4	0.81	15.19	9.04555	0.16	6.73	11.91	0.66	7.47	0.5	1.4	100.276			272.159	131.21	93.6807	622.838	1202.31	44.5736	306.641	12.1234		1317.14	98.3375	210.053		97.4751													56.943	44.5467	10.2421
Conticelli et al. (1997)	Circum-Mediterranean	BR 151	46.75	0.81	14.89	8.77777	0.15	6.99	12	0.93	7.4	0.48	1.19	100.368			267.907	152.13	92.6629	616.744	1251.11	51.5761	304.909	12.8952		3280.78	90.5116	200.722		94.9997													55.1816	42.5447	8.6497
Conticelli et al. (1997)	Circum-Mediterranean	BR 21	49.2601	0.809838	15.6469	8.25279	0.139972	6.05879	10.028	1.15977	8.16837	0.289942	0.62	100.434			278	123	68	623	1574	40	343	10		1573	108	219
Conticelli et al. (1997)	Circum-Mediterranean	BR 29	48.36	0.7	16.8	7.43888	0.13	6.57	9.85	1.3	8.33	0.61	0.4	100.489		29.4		162	74	636	1812	26	266	14		1202	88	202		90	17.5	3.2		1.5					2.2	0.38	6.2	0.58	46	45	10.2
Conticelli et al. (1997)	Circum-Mediterranean	BR 30	49.7	0.68	16.58	7.29111	0.13	6.53	9.69	1.36	7.8	0.41	0.34	100.511					76	526	1709	40	272	14		1152	93	209
Conticelli et al. (1997)	Circum-Mediterranean	BR 43	47.29	0.81	16.18	8.29222	0.12	6.81	10.04	1.8	7.78	0.72	0.66	100.502		23.9		48	60	757	1775	53	364	22		1568	104	230		97	19.6	3.5		1.6					2.5	0.38	7.1	0.63	56
Conticelli et al. (1997)	Circum-Mediterranean	BR 67	47.7	0.73	15.54	8.06111	0.14	7.02	11.85	0.88	7.19	0.57	0.74	100.421	27		203	215	79	549	1392	27	298	14		1404	112	222															43	37
Conticelli et al. (1997)	Circum-Mediterranean	BR 70	46.83	0.74	15.4	8.85222	0.15	6.9	12.27	0.87	7.46	0.61	0.46	100.542	22		235	119	77	483	1299	32	296	15		1672	137	295															49	50
Conticelli et al. (1997)	Circum-Mediterranean	BR 90	47.54	0.81	14.57	8.69666	0.17	6.96	12	0.65	6.12	0.65	2.19	100.357	24		253	146	87	488	1020	33	309	13		1788	125	298															52	53
Conticelli et al. (1997)	Circum-Mediterranean	BR 96	48.3	0.78	15.53	8.43111	0.16	6.83	11.19	1.32	6.29	0.52	1.2	100.551	22		233	105	73	622	1278	28	270	10		727	89	155															34	25
Conticelli et al. (1997)	Circum-Mediterranean	BR 97	47.87	0.76	16.21	8.35333	0.16	6.79	11.04	1	6.2	0.58	1.56	100.523	23		225	103	72	615	1297	28	256	12		753	88	166															39	23
Conticelli et al. (2009)	Circum-Mediterranean	RMN 44	46.33	0.971	15.262	9.28988	0.151	6.61	12.59	1.6	6.63	0.62	0.58	100.178			311.795	164.212	72.4005	321.742	1784	38.882	225.966	10.4736	30.975	1460	105.439	210.84	24.9221	90.0187	18.4046	3.69692	12.8962	1.812	7.31666	1.19172	2.96164	0.366813	2.15571	0.31112	6.38473	0.54	50.5742	36.6767	8.6834
Conticelli et al. (2011)	Circum-Mediterranean	VS 184	56.36	1.17	14.91	5.98222	0.11	9.48	5.37	1.44	4.96	0.29	0.41	100.482	41	20.4	131	494	267	379	391	27	495	26.3	22	839	76.989	178.992	21.7056	88.02	15.204	2.3322	6.2001	0.96115	4.991	1.0366	2.604	0.3597	1.9	0.2924	12.2	1.79	43	58.3	10.3
di Battistini et al. (1998)	Circum-Mediterranean	CM 09	49.49	0.71	16.65	7.75	0.12	6.55	10.48	1.84	6.01	0.39	0.5	100.49		26	215	108	70	385	1243	28	234	11		1007																		38
di Battistini et al. (1998)	Circum-Mediterranean	CM 14	47.89	0.68	14.02	7.51	0.12	9.31	14.21	1.66	4.27	0.33	0.87	100.87		34	227	269	122	358	803	25	183	11		728	59.9	130.7		65.4	12.9	2.43	8.34		5.26		2.28		1.84	0.26				26
di Battistini et al. (1998)	Circum-Mediterranean	CM 16	49.47	0.59	16.27	6.67	0.11	6.93	10.85	1.88	6.87	0.36	1.11	101.11		26	199	272	84	503	1306	27	237	19		1176	82.5	172.2		72.3	14.4	2.59	9.04		5.18		2.38		1.82	0.28				48
di Battistini et al. (1998)	Circum-Mediterranean	CM 207	44.9	0.74	12.9	8.54	0.13	7.88	15.4	1.25	6.59	0.37	1.5	100.2				234	39	635	2547	43	429	19		1628	161.5	336	40.1	152.2	26.7	21.6	17.5		9,97	1.34	3.75	0.42	3.19	0.37	9.8	1		76	16.4
Gasperini et al. (2002)	Circum-Mediterranean	V849B	49.29	0.75	16.17	8.32222	0.15	7.2	11.32	1.78	4.4	0.29	0.79	100.462			250	249	66.9	344	1047	22	205	11.2	20.1	526	48	102	12.5	50.6	8.91	1.92	6.49	0.88	4.52	0.79	0.28	0.28	1.76	0.26	5.3	0.7	21.8	26.5	5.19
Gasperini et al. (2002)	Circum-Mediterranean	V971	47.06	0.74	16.36	8.74889	0.15	7.41	12.89	1.5	3.77	0.3	1.22	100.149			205	256	74.8	309	1024	24.3	234	11.4	20.3	444	49.6	104	12.7	48.5	8.38	1.81	6.62	0.87	4.39	0.79	0.32	0.32	2.15	0.31	5.32	0.74	8.95	28.9	6.77
Gasperini et al. (2002)	Circum-Mediterranean	V975	47.67	0.7	11.79	8.45777	0.15	13.12	13.11	1.22	3.07	0.21	0.84	100.338						215.46	717.84	20.52	146.21	6.21	14	529.49	41.25	90.57	10.32	43.62	7.76	1.88	6.26	0.77	3.78	0.65	1.82	0.25	1.65	0.25	3.46	0.3313	22.32	19.104	4.401
Gasperini et al. (2002)	Circum-Mediterranean	V976	46.99	0.68	14.4	7.88555	0.14	10.4	13.58	1.46	3.14	0.32	1.6	100.596						226.34	967.69	21.71	148.25	7.07	14.59	592.19	47.92	97.92	11.31	44.39	8.3	1.84	6.59	0.84	4.02	0.7	1.86	0.26	1.78	0.28	3.78	0.3568	45.8	19.301	4.67
Gasperini et al. (2002)	Circum-Mediterranean	V977	48.31	0.7	13.82	8.19666	0.14	9.46	14.25	1.46	3.77	0.28	1.07	101.457						236	778	24	111	6	13.92	616	43.25	90.84	10.75	42.56	7.95	1.63	5.66	0.76	4.27	0.77	1.87	0.24	1.66	0.26	3.48	0.32	23.7	16.89	4.423
Gasperini et al. (2002)	Circum-Mediterranean	DMS 982	47.34	0.81	17.41	8.03666	0.15	6.5	10.62	2.15	5.79	0.53	1.14	100.477			263	284	66.4	392	1692	30.7	263	12.8	22.6	1039	85	168	19.7	77.9	14.4	2.97	9.97	1.37	6.37	1.03	2.58	0.33	2.13	0.29	6.07	0.56	42.1	30.2	6.37
Gasperini et al. (2002)	Circum-Mediterranean	DMS 983	49.52	0.67	16.55	7.45111	0.13	6.73	10.03	1.43	6.71	0.62	0.64	100.481			326	34	15.3	488	2178	40.5	419	10.1	36	1835	136	277	33	129	24.2	4.96	15.2	1.95	9.71	1.49	3.53	0.44	2.7	0.37	10.1	1.21	78.4	63.4	11
Gasperini et al. (2002)	Circum-Mediterranean	DMS 984	49.52	0.67	16.55	7.45111	0.13	6.73	10.03	1.43	6.71	0.62	0.64	100.481			272	258	76.3	524	1728	30.2	299	13.1	31.5	1013	90.1	182	23	88.2	17.2	3.27	11.2	1.28	6.48	1.02	2.26	0.32	2.14	0.28	7.13	0.66	45	44.8	9.98
Giannetti & Ellam (1994)	Circum-Mediterranean	R-35	45.3	1.04	16.75	10.4944	0.14	6.12	11.03	1.84	5.24	0.7	1.29	99.58		30	271	78	51	502	1606		262	8		1022		202.6		91.4	15.72	3.43	11.73			1.36	3.45		2.32	0.34
Peccerillo et al. (1988)	Circum-Mediterranean	CUP 2a	41.24	0.86	10.2	8.08	0.14	12.35	16.36	1.04	7.85	0.42	1.35	99.89		18	83	50	80	596	3704	59	825	46		4390	254	578		232	41	7.6		2.9					2.6	0.36	25	3.9		137	28.5
Peccerillo et al. (1988)	Circum-Mediterranean	VEN 2	41.52	0.76	12.05	7.10222	0.11	12.76	15.67	1.2	8.36	0.43	0.57	100.532		23	147	746	136	462	1819	41	341	16		720	95	191		88	20	3.3		1.4					3.1	0.43	9.2	0.84		38
Peccerillo et al. (1988)	Circum-Mediterranean	VEN 3	41.03	0.59	12.39	6.62333	0.1	13.09	15.5	1.04	8.86	0.36	0.86	100.443		19	112	830	153	458	1727	35	264	13	35	617	65	156		71	14	2.7		1.1					2	0.33	7.4	0.75		30	9.8
Peccerillo et al. (1988)	Circum-Mediterranean	VEN 7Q	38.96	2.14	10.44	11.0289	0.18	7.3	18.85	1.65	7.03	1.49	1.72	100.789		58	430	75	40	277	2330	95	952	39		2044	236	482		214	52	8.1		3.9					6.7	1	25	2.3		112
Perini et al. (2004)	Circum-Mediterranean	VCO 20	47.02	0.72	15.84	8.70667	0.16	7.19	13.53	1.44	4.31	0.24	0.95	100.107		25.8	205.942	243.673	86.8039	315.732	1065.31	34.6931	237.23	13.3244		485.813	52	112		45	9.5	1.9		0.84					2.4	0.44	5.1	0.86	16.6335	29.3	3.90235
Perini et al. (2004)	Circum-Mediterranean	VCO 3	49.21	0.76	15.96	8.43777	0.15	7.6	11.02	1.59	4.79	0.22	0.64	100.378		36.1	254.961	205.828	79.2789	348.006	1063.16	32.5546	221.298	12.7629		575.696	51	115		45	9.6	2.05		0.9					2.1	0.39	5.6	0.83	24.1884	28.3	3.64486
Perini et al. (2004)	Circum-Mediterranean	VCO 4	49.12	0.78	15.61	8.80777	0.15	7.33	11.44	1.85	4.31	0.25	0.81	100.458			241.345	205.845	76.7411	288.582	1091.48	30.6269	227.626	12.8755		559.705																	20.3987		3.24129
Perini et al. (2004)	Circum-Mediterranean	VCO 5	49.44	0.73	16.04	8.11889	0.14	7.29	11.26	1.7	4.57	0.28	0.47	100.039			155.357	206.092	78.5265	311.82	1057.84	30.8037	211.8	11.7771		572.191																	25.2109		2.56929
Perini et al. (2004)	Circum-Mediterranean	VCO 8	49.65	0.76	15.24	8.58888	0.15	7.16	11.46	1.82	4.56	0.23	0.79	100.409			246.374	227.671	73.962	339.408	1064.19	32.7782	231.211	12.9585		530.975																	33.3657		5.11666
Perini et al. (2004)	Circum-Mediterranean	VCO 9	49.54	0.76	15.34	8.56222	0.15	7.29	11.61	1.8	4.64	0.24	0.61	100.542			249.256	233.424	72.2005	340.289	1071.41	32.318	230.79	13.3206		538.754																	27.0908		5.57378
Rogers et al. (1985)	Circum-Mediterranean	LBsn 7305	47.12	0.64	11.84	7.87111	0.15	12.84	13.88	1.42	3.29	0.3	0.65	100.001			186	911	261	252	769	24	128	8		620	40.4	92		41.7	8.27	1.79	6.4	1.01					1.63	0.2	3.59	0.45		20.5	4.5
Rogers et al. (1985)	Circum-Mediterranean	LBsn 7306	47.88	0.66	12.13	7.79111	0.14	12.2	14.05	1.24	3.18	0.29	0.51	100.071			177	782	224	242	724	24	122	5		561	42	87		42.6	7.31	1.76		0.89					1.72	0.24	3.39	0.41		20.3	4.5
Rogers et al. (1985)	Circum-Mediterranean	TeL 7502	47.52	0.87	14.52	8.82777	0.14	7.38	13.15	0.96	5.14	0.33	0.4	99.2378			243	138	61	425	1122	26	180	6		592	55.7	127		64	11.7	2.55	10.1	1.41					2.14	0.26	5.4	0.6		21.8	4.3
Conticelli et al. (1986)	Circum-Mediterranean	Bols 270	52.95	0.86	16	7.86444	0.13	6.48	8.53	1.68	4.73	0.33	1	100.554		29.7		159	37	265	726	30	282	22		878	64	139		35	11.7	2.29		0.98					2.15	0.58	6.4	0.79		32
Conticelli et al. (1986)	Circum-Mediterranean	Bols 282	48.5	0.83	15.05	7.76	0.13	6.23	13	1.61	5.52	0.33	0.96	99.92		24.1		234		349	1239	28	268	16		890	74	150		66	12.8	2.5		1					2.1	0.37	5.9	0.81	59	31.39	7.61
Conticelli et al. (1986)	Circum-Mediterranean	Bols 293	48.51	0.91	17.66	8.03333	0.13	6.38	11.04	1.5	4.85	0.38	1.17	100.563		27.9		138	60	300	1141	34	222	12	23	856	56.2	113		51	12	2.1		0.82					2.4	0.27	5.3	0.65		21	4.4
Joron et al. (1987)	Circum-Mediterranean	V 110	47.9	1.01	15.2	8.57	0.14	6.38	12.3	2.14	5.72	0.84	0.64	100.84		29.4		118	48	224	900	22	206	20	13.3	1670	46.4	95		42.7	10.42	2.37		1.23					2.22	0.34	4.75	1.6		17.1	5.03
Joron et al. (1987)	Circum-Mediterranean	V134	47.6	0.96	14.5	8.41	0.15	7.23	13.3	1.63	4.79	0.83	1.43	100.83		33.8		124	55	191	836	21	180	21	10.4	1580	43	86		41.3	9.75	2.24		1.07					2.1	0.28	4.42	1.57		13.93	4.2
Avanzinelli et al. (2008)	Circum-Mediterranean	97VS718b	48.94	1	13.79	7.84	0.138723	7.52	12.4	1.89	5.72	0.76	0.885865	100.885			228	218	66	227	694	21.9	180	32	12.2	1710	46	94	11.7	45.3	9.5	2.27	8.2	0.92	4.23	0.77	2.2	0.25	1.9	0.26	4	1.6		17.49	6.23
Boari et al. (2009a)	Circum-Mediterranean	CA 13	44.24	0.99	17.81	8.31444	0.13	6.57	10.2	1.81	9.29	0.51	0.6	100.01			262	12	37	568	1865	42	277	20	51.3	2131	119	230	27.8	100	17.3	3.51	13.7	1.45	6.39	1.06	2.89	0.34	2.3	0.3	7	1.1	86	41	8.03
Boari et al. (2009a)	Circum-Mediterranean	CA 14	44.34	1.01	17.51	8.11	0.14	6.06	10.41	1.53	8.89	0.48	1.56	100			266	9	39	537	1873	45	281	21		2158	139	264		112													75	39
Boari et al. (2009a)	Circum-Mediterranean	CA 18	46.55	0.87	15.7207	7.87148	0.132456	7.71299	11.0855	1.27361	8.00847	0.5502	0.804923	99.99			242	444	130	439	1723	32	229	15		1380	106	243		87													83	37
Boari et al. (2009a)	Circum-Mediterranean	CA 21	45.69	0.9	14.73	8.05111	0.14	8.91	12.33	1.15	7.21	0.54	0.89	100			243	418	125	429	1658	27	213	13		1329	107	197		90	19	3		1.2					2.1	0.24	7.4	0.85	90	45	6.99
Boari et al. (2009a)	Circum-Mediterranean	CA 3	46.8	0.69	15.77	8.2211	0.11	6.01	10.6	2.21	9.71	0.61	0.51	100.62		25.5651		365.841	101	461	1785			15.15	45		100	225		95	19	3.25		1.7					1.99	0.47	9.2	1.01	87	55
Boari et al. (2009a)	Circum-Mediterranean	CA 4	47.21	0.85	14.8097	7.90507	0.118636	7.78	12.46	1.33	6.66	0.543747	0.982155	99.9982		33.5		35.5	110	344	1395			14	40		94.2	202		81	17.1	3.22		1.4					2	0.48	8.9	0.91		53
Boari et al. (2009a)	Circum-Mediterranean	CA 46	46.25	0.88	15.11	8.81	0.16	6.55	11.67	2.11	7.49	0.53	0.8	100.46		25	279	91	69	477	1502	33.1	360	19.6	30.9	754	78.1	171	21.7	81	15.6	3.18	10.7	1.43	6.7	1.11	2.93	0.389	2.29	0.337	9.7	1.15	29	36.2	5.33
Boari et al. (2009a)	Circum-Mediterranean	VLS 20	43.7093	0.742194	15.1852	7.85987	0.137055	7.4778	11.886	2.08	9.16239	0.762392	1.46	100		20	282	22	48.0923	425	1588	45	304	17		1748	120	247		113													76	48	14
Boari et al. (2009a)	Circum-Mediterranean	VLS 24	44.05	0.71	15.76	9.02111	0.15	6.66	10.9503	2.12313	7.95	0.73	2.48	100.023		19	289	21.6435	48	421	1632	45	307	16		1665	123	256		117													80	48
Boari et al. (2009a)	Circum-Mediterranean	VLS 25	44.0971	0.711403	15.8386	9.35683	0.138328	6.95	11.0182	2.18415	8.10209	0.767732	1.46	100		20.1	290	29	48	425	1673	45	302	16		1721	148	267		120	27	4.19		1.7					2.82	0.42	8.89	0.89	83	50.15	13.32
Boari et al. (2009a)	Circum-Mediterranean	VLS 26	49.52	0.7	14.62	7.68111	0.127599	6.3761	9.49416	1.7039	8.84	0.67	0.75	99.9718		33.1	257	61	63	520	1486	42	271	15		1316	107	212		94	19.2	3.39		1.33					2.47	0.39	8.5	0.88	58	43.1
Boari et al. (2009a)	Circum-Mediterranean	VLS 32	49.5346	0.739149	14.9979	7.4721	0.115681	6.3949	9.00991	1.38708	9.23882	0.707637	0.68	100		30.4	250	92	63	514	1491	44	278	15		1398	110	222		107	20	3.7		1.38					2.01	0.32	8	0.72	56	45.7
Boari et al. (2009a)	Circum-Mediterranean	VLS 34	48.7151	0.644695	14.13	7.58555	0.130056	6.6797	10.8493	1.6	8.02	0.52401	1.51	100.013		28	239	118	78	475	1426	39	270	13		1149	98	195		92													49	33
Boari et al. (2009a)	Circum-Mediterranean	VLS 35	48.2736	0.633951	14.2353	7.4563	0.132056	6.6981	10.8445	1.586	7.99545	0.552443	2.07	100		27	243	133	83	440	1462	42	264	14	31.9	1127	107	216	27.1	98.7	17.6	3.49	13.7	1.45	6.6	1.1	2.95	0.35	2.2	0.29	7	0.8	57	36.71	8.45
Boari et al. (2009a)	Circum-Mediterranean	VLS 36	45.82	0.71	15	8.73222	0.132928	6.314	10.7473	2.0768	8.6774	0.69	1.49	99.9884		19	302	19	48	444	1734	44	300	15		1699	124	246		121													76	45
Boari et al. (2009a)	Circum-Mediterranean	VLS 37	46.4	0.72	14.99	7.92111	0.139307	6.12	10.47	2.17963	9.11	0.68	1.65	99.9989		17	300	24	45	414	1792	45	307	16.4069		1694	119	260		120													78	46
Boari et al. (2009a)	Circum-Mediterranean	VLS 38	46.48	0.71	15.03	8.17	0.139016	6.39	10.4126	2.06776	8.94	0.71	1.3	99.9794		15	293	21	47.3706	422	1800	46	309	17	40.7	1722	130	271	33.9	127	22.9	4.48	17.8	1.9	8.73	1.42	3.7	0.42	3	0.41	9	0.9	82	50	10.1
Boari et al. (2009a)	Circum-Mediterranean	VLS 41	47.8309	0.666945	14.5235	7.79507	0.139362	6.51	10.5118	1.475	8.12027	0.527583	2.47	100.359		27	246	107	83	495	1412	43	279	14		1364	101	205		97													59	38
Boari et al. (2009a)	Circum-Mediterranean	VLS 43	47.4749	0.58	14.2384	7.08904	0.114852	8.038	11.5828	1.23	7.6584	0.509548	1.205	99.2732		39.7	228	206	96	386	1235	39	251	14		1019	89	185		83	17.8	3.6		1.4					2.1	0.3	7.1	0.8	46	31.9
Boari et al. (2009a)	Circum-Mediterranean	VLS 45	49.29	0.717719	14.74	7.36777	0.150043	6.58	9.19	1.82	9.07	0.63	0.81	99.9178		27	258	99	64	490	1320	43	280	16		1381	115	217		105													61	45
Boari et al. (2009a)	Circum-Mediterranean	VM01/3	52.87	1.08	11.6	11.57	0.09	7.27	1.42	0.51	6.51	0.66	6.08	99.64	46	12	86	384	257	260	307	21	477.55	34.3367	15.4	1853	62.8	154	19.6	84.3	14.6	2.7	9.3		4.4		1.8		1.6	0.2	13.3767	2.69067	56	18.5	6.2
Boari et al. (2009b)	Circum-Mediterranean	ERN22	46.91	0.81	17.53	7.91777	0.12	6.01	10.23	2.52	6.99	0.36	1.06	100		24	241	132	61	429.368	1611	23.5483	416.103	18.7291		1121	99	217.535		85
Boari et al. (2009b)	Circum-Mediterranean	ERN24	46.8609	0.838406	16.8779	8.12997	0.149715	6.03	11.0191	1.89	7.00668	0.409222	1.13698	100			260.045	175.9	70	400.348	1926	32.3773	288.72	12.9033		1160.96	96.0423	202.644		82.6451													56.3775
Boari et al. (2009b)	Circum-Mediterranean	ERN39	46.9758	0.838853	16.4575	7.36141	0.139809	6.51	11.6441	2	6.45118	0.419427	1.46641	100			196.943	206.814	101	430.779	1991	34.153	350.294	23.3827		1823.88	128.462	259.898		102.382													106.015
Boari et al. (2009b)	Circum-Mediterranean	ERN40	46.6527	0.984114	16.8456	7.30926	0.130051	6.27	10.3341	2.59	7.99163	0.420165	0.79683	100	26.2	20.1	198	205.186	95	391	2140	33.2	344	24.5	38.6	1980	146	283	30.9	113	19.7	4.17	17.3	1.91	8.28	1.4	3.79	0.45	2.71	0.4	9.17	1.46	81.3	61.6	13.1
Boari et al. (2009b)	Circum-Mediterranean	ERN41	47.1389	1.00256	17.6095	6.95904	0.131479	6.05	10.2453	2.15	7.76641	0.414665	0.75	100			190.182	227.636	93	361.965	2332	31.9243	341.722	25.9887		2077.48	137.883	275.535		99.7348													75.2984
Boari et al. (2009b)	Circum-Mediterranean	ERN44	46.5901	0.848181	16.4547	8.25233	0.159658	6.55	11.4255	1.92	7.23448	0.369208	0.472555	100	29.5	23.6	250.944	175.015	71	456	1870	33.6	290	13.9	31.4	1250	94.4	206	24.2	94.5	17.6	3.69	15.5	1.81	8.18	1.39	3.68	0.45	2.68	0.4	7.94	0.58	37.9	32.4	8.31
Boari et al. (2009b)	Circum-Mediterranean	ERN48	46.7767	0.847584	17.1511	8.12549	0.149574	6.05	11.3875	1.94	6.98011	0.388892	0.61079	100	25.7	21	240	173.084	61	395	1900	32.6	271	12.3	28.8	1230	93.3	206	24.1	93.9	17.8	3.76	15.6	1.84	8.19	1.42	3.72	0.45	2.73	0.41	7.6	0.47	43.7	30.9	7.62
Boari et al. (2009b)	Circum-Mediterranean	ERN50	46.5153	0.838113	17.2112	8.28044	0.149663	6.25	11.115	2.18	6.64504	0.359191	0.836088	100	30.1	22.4	240	181.787	73	446	1790	32	280	13.5	31	1150	93	205	23.7	92.2	17.3	3.66	15.2	1.78	7.99	1.37	3.62	0.43	2.65	0.39	7.76	0.61	48.2	32	7.45
Boari et al. (2009b)	Circum-Mediterranean	ERN73	47.5219	0.757798	17.9877	7.78694	0.149565	6.04	9.97103	2.28	6.70053	0.408812	0.817875	100	33.6	19	227	117.93	55	476	1800	34.4	298	13.9	32.3	892	96.3	213	24.7	95.8	17.9	3.67	15.8	1.85	8.4	1.45	3.84	0.47	2.88	0.43	8.13	0.66	41.2	32.2	7.26
Boari et al. (2009b)	Circum-Mediterranean	ERN75	47.6264	0.777818	17.481	7.88716	0.14958	6.11	10.5504	2.11	6.39207	0.418825	0.95679	100			222.147	175.79	64	327.285	1756	31.2641	280.11	12.9582		886.237	88.2361	200.972		78.7243													47.7872
Boari et al. (2009b)	Circum-Mediterranean	ERN87	46.7769	0.848311	16.7866	8.1861	0.149702	6.19	11.567	2.18	6.54697	0.359285	0.708108	100			254.971	166.073	63	366.441	2007	35.0897	273.423	14.3626		1233.74	88.9951	215.999		90.4967													50.3103
Caprarelli et al. (1993)	Circum-Mediterranean	V 35	47.33	0.88	17.4	7.50777	0.14	6.14	11.32	2.22	6.13	0.92	0.46	100.448		28			48	254	780	27	243	26	15	1705	45	96			9	2.48		0.91					2		4.7	1.56		17.6	6.2
Caprarelli et al. (1993)	Circum-Mediterranean	V 68	47.42	0.95	17.41	7.78889	0.14	6	10.21	3.02	6.24	0.79	0.44	100.409		28		101	46	232	820	23	218	24	13	1600	39	80			8.5	2.42		0.87					1.97		4.8	1.53		15.3	5.5
Civetta et al. (1984)	Circum-Mediterranean	VS 01	49.3	0.58	16.65	6.48555	0.12	6.83	10.47	1.42	7.09	0.4	0.98	100.326		24		483	82	528	1311		200			923	85	155		69	15.1	2.3		1.1					1.68	0.35	4.8	0.8		46
Civetta et al. (1984)	Circum-Mediterranean	VS 06	46.95	0.66	14.43	7.52	0.14	9.28	13.74	1.42	5.1	0.36	0.78	100.38		36		514	118	362	895		191			567	54	119		59	9.7	2.14		1					1.73	0.32	4.8	0.5		29
Civetta et al. (1984)	Circum-Mediterranean	VS 17	47.51	0.67	14.58	7.54666	0.14	9.04	13.66	1.11	4.87	0.39	0.99	100.507		32		478	122	344	814		192			600	54	108		55	11.9	2		0.68					1.6	0.25	4.3	0.4		26
Conticelli & Peccerillo (1992)	Circum-Mediterranean	SVK 01	41.88	0.69	12.28	6.89444	0.11	12.78	15.21	1.06	8.36	0.39	0.83	100.484	50	21.4	110	880	141	432	1706	27	319	18	33	501	77	176		94	16.6	3.01		1.4					2.37	0.45	8.3	0.92	16.52	36.85	9.125
Conticelli & Peccerillo (1992)	Circum-Mediterranean	SVK 02	40.27	2.07	9.9	11.3689	0.2	9.15	17.88	1.56	6.26	1.14	1.06	100.859		55.1		69	63	218	2229	65	586	44	14	2159	229	475		209	49	7.98		4					6.5	0.7	22	2.1		81	23.8
Conticelli & Peccerillo (1992)	Circum-Mediterranean	SVK 04	42.22	0.74	11.87	7.21	0.12	12.7	15.11	1.06	8.21	0.34	0.77	100.35		20.3	131	690	120	398	1340	29.3	310	17.8	38.2	669	86.9	196	23.2	89.2	16.8	3.58	12	1.57	7.58	1.19	3.05	0.398	2.34	0.319	9.03	0.81	29	30.7	7.98
Conticelli & Peccerillo (1992)	Circum-Mediterranean	SVK 07	44.49	1.11	7.92	7.98111	0.11	10.38	14.68	0.32	9.55	1.34	2.48	100.361	104	16.6	72	65	87	509	3758	44	848	47	74	3980	257	526		248	38.9	6.79		2.5					2.9	0.59	22.9	3.3	36.1905	112.433	28
Conticelli & Peccerillo (1992)	Circum-Mediterranean	SVK 08	44.88	1.08	7.86	7.46555	0.11	10.28	13.96	0.31	8.41	1.4	4.51	100.266			73	60	70	516	3200	52.6	519	43.1	98.6	4090	279	526	64	234	40.9	8.28	28.8	3.18	13.4	1.93	4.53	0.53	2.85	0.349	12.1	3.29	128	108	23.8
Prelević et al. (2008)	Circum-Mediterranean	Ar99/2	42.39	0.79	10.21	7.57	0.12	10.05	9.54	1.28	3.06	0.96	11.07	97.04	109	26	159	824	275	148	516	25	176.667	10.16	10.3	1276	28.7	60	7.6	32	6.5	2	5.1		3.3		1.6		1.6	0.2	4.57	0.564333	33	15.9	6.1
Guo et al. (2006)	South Tibet	G98-1	50.24	1.2	12.02	8.11	0.14	8.42	10.4	2.89	6.32	0.25	1.24	2.18685		23.3	205.3	389.2	134.6	119	2433	38.2	428	68.2		7504	405	658	65.3	208	34.7	8.61	18.5	2.28	9.65	1.56	4.02	0.58	3.84	0.57	10.6	1.04	68.6	134.1	10.56
Guo et al. (2006)	South Tibet	JC973	49.43	1.39	14.86	10.32	0.14	6.34	9.93	2.05	4.88	0.65	1.83	2.38049		18.2	126.9	211.9	113.6	279	1706	31.7	338	46.5		7108	219	314	37.2	119	21.4	5.36	12.2	1.64	8.29	1.48	3.96	0.63	4.07	0.59	7.26	2.71	58.5	126.9	5.67
Guo et al. (2006)	South Tibet	JC975	47.16	1.52	12.79	10.58	0.15	9.21	10.43	2.17	4.75	1.23	2.03	2.18894		22.1	166.9	524.7	133.8	359	1289	30.1	494	24.3		6428	129	202	22.9	75.3	15.1	3.84	8.06	1.03	5.76	1.24	3.44	0.46	2.96	0.44	11.3	2.31	53.6	25.9	5.86
Guo et al. (2006)	South Tibet	JC978	49.49	1.6	12.93	11.52	0.09	7.62	9.14	2.05	4.89	0.66	0.46	2.38537		20.5	135.8	405.7	136.7	388	946	30.9	389	16.54		4985	38.9	77.2	9.61	36.74	8.51	2.28	4.67	0.69	4.26	0.86	2.51	0.38	2.54	0.38	9.21	2.33	50.7	21.6	5.98
Guo et al. (2006)	South Tibet	QS22	50.7	1.57	13.27	9.19	0.14	7.37	9.92	2.15	4.42	1.27	1.14	2.05581		24.4	128.9	389.2	142.5	126	1788	25.7	369	92.1		2008	162	269	25.2	82.5	19.6	4.84	9.34	0.96	4.21	0.76	1.99	0.3	2.14	0.33	10.4	2.66	51.6	59.24	7.26
Guo et al. (2015)	South Tibet	16YS	56.65	1.52	11.61	6.68784	0.16	8.23	6.57	1.74	5.92	0.92	1.47			23.5	114	513	395	917	464	17.9	495	22.6		2409	68.2	179	25.7	103	23.8	2.38	12		5.75		1.69		1.41	0.22	13.1	1.43	61.1	184	21.8
Guo et al. (2015)	South Tibet	20YS	59.17	1.1	12.27	5.75814	0.11	6.79	5.62	2.83	5.97	0.38	1.28			28.9	267	459	523	1428	435	20.1	401	26.3		3128	90.4	209	27.2	106	25.1	3.82	19		5.34		2.04		1.94	0.32	11	1.96	79.3	185	18.7
Guo et al. (2015)	South Tibet	23YS	57.55	1.19	12.59	6.67785	0.12	6.9	5.73	2.72	6.16	0.35	0.63			29	246	563	421	1098	452	22	386	21.6		2899	85.2	226	29.3	111	24.7	2.77	17.2		6.58		2.16		2.19	0.3	13.4	2.51	81.4	149	18.9
Guo et al. (2015)	South Tibet	25YS	55.12	1.19	11.59	6.90777	0.12	9.45	6.78	1.92	6.07	0.86	0.92			21.1	136	584	347	840	615	21.4	480	16.1		2358	80	198	25.2	82.7	16.8	2.71	13.4		6.96		2.35		2.06	0.31	11.5	0.77	58.6	173	24.4
Guo et al. (2015)	South Tibet	99-B06	55.43	1.47	11.99	6.04805	0.12	9.62	6.55	2.12	5.48	1.16	1.59			38.3	318	584	527	916	809	16.6	538	25.3		2520	84.7	204	29.8	132	30.5	4.47	17.6		7.05		1.68		1.53	0.25	13.5	1.68	86.7	162	24.9
Guo et al. (2015)	South Tibet	99-B09	58.14	1.24	12.67	6.14802	0.08	6.84	4.39	2.3	7.34	0.86	1.64			19.2	198	352	317	675	716	23.1	718	24		3418	97.5	245	33.4	138	32.5	4.39	18.5		7.02		2.39		1.99	0.29	20.4	1.81	93.8	186	21.4
Guo et al. (2015)	South Tibet	99-B23	56.41	1.06	13.47	6.10803	0.12	7.09	4.98	2.24	7.69	0.83	1.87			26.2	119	419	247	719	1079	21.1	580	24.2		3625	113	273	39.1	158	37.7	4.38	19.8		6.34		2.25		1.98	0.29	13.7	1.58	73.3	174	22.2
Guo et al. (2015)	South Tibet	99-C12	53.73	0.98	13.67	7.1377	0.13	8.11	5.41	2.27	7.86	0.69	0.91			23.5	137	527	324	759	829	25.2	635	12.9		3124	95.4	234	33.6	143	33.2	4.69	20.3		6.21		2.26		2.17	0.32	17.9	1.13	85.3	168	18.3
Guo et al. (2015)	South Tibet	99-C15	55.45	1.66	13.48	6.34795	0.11	8.08	5.86	1.9	6.47	0.63	0.92			19.8	172	538	387	867	801	18.5	637	18.3		2113	90.2	237	34.9	161	38.4	6.18	26.2		6.84		1.92		1.68	0.23	9.03	1.51	71.1	212	36.2
Guo et al. (2015)	South Tibet	99-C28	58.02	1.29	13.61	6.33796	0.09	8.28	4.25	1.65	5.75	0.73	1.63			24.2	153	332	263	643	672	16.9	569	41.4		2110	78.4	202	29.2	138	36.4	4.51	22.6		5.04		1.53		1.37	0.21	14.9	2.67	84.2	253	37.4
Guo et al. (2015)	South Tibet	BG015	53.73	1.13	13.91	4.57852	0.26	8.91	7.24	1.59	7.46	1.18	1.83			21.6	126	553	465	621	1638	20.1	421	36.6		3351	97.5	262	33.8	125	28	4.47	17.6		8.52		2.87		1.86	0.26	12.2	1.89	86.3	95.2	13.5
Guo et al. (2015)	South Tibet	BG026	54.23	0.91	11.73	6.61787	0.12	9.14	7.25	1.78	7.09	1.13	0.76			21	116	493	315	710	1619	25.3	483	10.2		3817	127	324	46.6	204	43.4	4.63	14.3		7.89		2.55		1.77	0.24	6.56	0.58	89.2	102	7.21
Guo et al. (2015)	South Tibet	BG037	53.87	1.52	13.57	5.49823	0.15	7.49	6.5	1.78	8.27	1.34	1.68			19.2	119	361	475	583	1696	15.8	386	42		2634	74.1	189	27	111	25.2	3.78	12.3		6.39		2.31		1.61	0.2	12.1	2.33	80.4	83.5	12.4
Guo et al. (2015)	South Tibet	BG201	54.29	1.38	12.08	7.27765	0.13	7.58	7.73	1.27	7.07	1.19	1.84			17.1	159	348	390	457	1718	32.7	415	41		2351	82.9	190	26.3	108	23.1	4.12	11.9		5.57		2.03		1.93	0.29	10.4	2.75	72.9	70.2	14.6
Guo et al. (2015)	South Tibet	BG203	53.4	1.12	11.69	6.16801	0.15	9.83	7.45	1.61	7.63	0.94	1.24			19.8	136	458	327	553	1527	23.6	587	43.4		3476	101	263	38.9	173	36.3	4.68	15		7.63		2.58		2.09	0.3	8.98	2.44	82.1	107	10.3
Guo et al. (2015)	South Tibet	GB036	53.39	1.27	12.77	6.43793	0.09	7.79	6.48	2.45	8.1	1.2	3.25			22.7	172	465	517	386	766	25.7	564	19.3		2185	139	308	41	152	28.3	5.24	20.9		6.03		2.43		2.13	0.31	11.7	1.51	83.2	108	20.1
Guo et al. (2015)	South Tibet	GH03	56.71	1.61	11.84	5.31829	0.08	7.97	6.2	1.53	8.02	0.72	1.52			18.3	136	356	262	342	1294	15	890	62.4		3557	319	571	65.8	226	37.8	5.53	17.8		6.03		1.55		1.32	0.2	25.8	4.81	191	117	16.7
Guo et al. (2015)	South Tibet	GH05	56.57	1.54	12.33	7.02773	0.13	6.99	6.14	1.62	6.71	0.95	1.67			16.3	144	515	364	427	1016	28.7	844	62.7		3069	234	486	60.8	214	36.8	4.68	12.3		5.35		2.05		1.98	0.28	25.6	3.02	94.6	138	18.4
Guo et al. (2015)	South Tibet	GH09	54.53	1.6	14.17	5.85811	0.05	7.88	6.45	1.36	6.91	1.19	1.89			19.3	171	590	271	695	873	33.9	729	57.2		2298	213	403	47.1	136	21.9	3.48	14		6.15		2.26		1.77	0.27	16.4	2.18	110	82.2	21.6
Guo et al. (2015)	South Tibet	GZF3	55.59	1.67	12.4	5.54821	0.12	8.63	4.59	1.39	8.89	1.18	1.38			22.4	149	557	296	371	1448	16.8	1515	80.3		4820	271	574	76.5	285	38.8	5.49	15.6		5.03		1.44		1.24	0.18	49	5.51	125	186	21.9
Guo et al. (2015)	South Tibet	GZF9	55.13	1.7	12.54	6.46792	0.13	7.43	6.19	1.42	7.99	1	1.85			23.1	178	419	211	324	1529	14.2	1143	61.1		3242	267	545	72.9	280	51.2	6.84	31.6		6.51		1.67		1.52	0.21	36.3	5.42	102	140	18.4
Guo et al. (2015)	South Tibet	GZ-S05	55.97	0.93	11.55	6.76782	0.14	6.96	8.03	2.57	6.21	0.87	1.69			17.6	108	390	364	683	503	23.4	461	24.2		2138	59.1	142	17.4	65.3	12.1	1.84	6.89		4.1		1.74		1.66	0.25	12.6	1.78	56.1	128	14.5
Guo et al. (2015)	South Tibet	GZ-S06	56.35	1.26	12.14	6.8378	0.12	7.16	7.32	2.15	5.78	0.88	2.15			33.3	139	473	362	1030	683	22	505	28.8		3216	55.4	143	19.2	78.4	19.6	2.45	10.1		5.32		1.63		1.43	0.21	13	1.57	57.3	221	21.4
Guo et al. (2015)	South Tibet	GZ-S12	59.74	0.56	12.81	5.54821	0.07	7.04	5.59	2.5	5.18	0.97	1.08			10.3	168	563	408	674	481	17.9	450	25.2		2320	56.3	131	17.4	69	16.4	2.15	8.58		4.47		1.71		1.52	0.23	9.16	1.88	70.6	112	20.9
Guo et al. (2015)	South Tibet	GZ-S15	57.01	1.17	13.35	7.18768	0.08	6.83	4.75	2.05	6.87	0.71	0.69			38.8	146	453	350	719	735	15.7	374	28.7		1369	40.7	108	14.9	60.8	16.3	3.06	11.7		4.65		1.58		1.26	0.19	10.2	1.54	39.3	232	18.4
Guo et al. (2015)	South Tibet	GZ-S27	54.9	0.9	12.92	6.91777	0.13	7.34	5.45	2.39	8.05	0.99	1.07			21.6	125	422	273	643	691	16.6	495	34.9		1407	51.6	135	21.3	83.2	19.4	2.73	12.6		4.88		1.6		1.28	0.2	13.5	1.63	34.3	174	23
Guo et al. (2015)	South Tibet	JS07	58.03	1.25	12	6.29797	0.15	7.33	6.15	2.18	5.36	1.23	1.45			27.8	148	655	434	1025	657	18.3	416	21.7		2944	65.4	163	22.4	86.4	19.9	2.66	11.2		5.62		2.24		1.94	0.32	19.3	2.41	76.5	156	19.1
Guo et al. (2015)	South Tibet	MG-008	53.62	1.52	11.85	4.61851	0.15	13.1	4.65	2.17	7.12	1.19	1.68			18.3	147	543	379	521	1339	19.7	831	32.1		3603	96.8	257	35.5	148	32.2	5.16	16.8		7.84		2.57		2.13	0.32	28.7	2.77	109	103	23.7
Guo et al. (2015)	South Tibet	MG-012	52.65	1.27	11.12	6.34795	0.11	11.29	6.73	1.66	7.65	1.16	0.84			21.6	137	574	401	532	1027	27.4	695	31.6		2943	163	435	66.3	297	57.2	7.48	25.1		8.73		2.67		2.16	0.34	23.1	1.95	113	272	37.7
Guo et al. (2015)	South Tibet	MG-015	54.95	1.32	10.86	6.198	0.08	9.33	6.72	1.5	7.75	1.29	1.57			16.4	196	539	357	537	949	30.1	658	28.4		3153	148	412	61.5	284	54.6	7.76	26		7.89		2.44		1.89	0.28	18.9	1.81	115	283	34.1
Guo et al. (2015)	South Tibet	MG-016	53.11	1.38	12.01	7.15769	0.14	9.26	6.94	1.4	7.28	1.32	1.96			20.9	150	592	441	610	913	13.9	717	29.7		4095	153	398	56.8	244	51.9	7.19	24.3		8.64		2.65		1.61	0.19	25.7	2.45	101	221	31.3
Guo et al. (2015)	South Tibet	MG1301	53.75	1.54	11.15	6.38794	0.1	11.03	5.21	1.61	7.97	1.25	0.22			22.6	143	717	493	775	1264	39.5	908	41		5323	194	503	75.3	336	64.2	9.25	35.1		11.5		3.61		2.41	0.33	25.7	2.22	106	336	42.5
Guo et al. (2015)	South Tibet	MG1303	46.44	1.2	10.09	8.30732	0.13	15.75	10.47	0.9	5.73	0.98	2.2			27.6	148	516	452	298	3389	36.4	311	11.9		14076	169	290	33.3	134	24.5	6.28	18.9		8.95		3.47		2.57	0.37	6.77	0.59	286	83.4	11.9
Guo et al. (2015)	South Tibet	MgL 7501	46.74	0.75	12.3	8.39999	0.19	8.96	15.35	0.81	4.59	0.34	1.08	99.51			212	230	109	396	792	28	182	7		738	51.8	124		55.5	11	2.33	8.8	1.27					1.81	0.22	4.98	0.6		30.3	4.6
Guo et al. (2015)	South Tibet	SLP1302	56.8	1.54	12.03	5.92809	0.09	8.2	4.83	2.13	7.29	1.18	0.86			18.2	112	460	306	928	732	33.4	722	35.2		2795	104	289	46.5	227	47.6	6.55	24.1		8.36		2.97		2.18	0.31	20.6	2.09	78.9	299	40.6
Guo et al. (2015)	South Tibet	SLP1308	55.67	1.56	13.7	6.93776	0.15	7.55	5.3	2.71	5.61	0.82	0.26			16.4	127	289	220	503	912	24.4	618	34.9		2501	101	244	33.5	149	26.7	3.77	15.3		6		2.32		1.8	0.26	17.9	2.36	89.2	131	15.6
Guo et al. (2015)	South Tibet	SLP1314	47.04	1.44	10.5	8.25734	0.13	13.74	8.88	0.91	7.89	1.21	1.36			26.6	172	499	272	675	3476	51.8	538	22.1		10115	325	680	87.2	347	65	12.4	44.7		15.7		4.44		2.59	0.34	12.3	1.11	176	172	16
Guo et al. (2015)	South Tibet	SLP1320	56.8	1.42	12.61	6.46792	0.1	8.82	4.94	1.95	6.04	0.86	0.32			20.2	136	503	308	528	931	27.4	598	35.2		2400	110	278	39.2	184	33	4.94	18		7.06		2.69		2.08	0.31	17.4	2	57	186	23.2
Guo et al. (2015)	South Tibet	SQH-08	57.23	1.58	11.45	5.13834	0.08	7.47	7.01	3.01	6.51	0.53	1.34			28.4	153	362	236	672	411	21.9	355	29.7		2335	50.8	124	18	75.2	18.1	2.21	10.8		5.63		2.24		1.87	0.29	12.3	1.86	42	185	16.8
Guo et al. (2015)	South Tibet	SQH-15	57.47	1.35	12.15	6.36795	0.07	7.21	8.05	2.16	4.76	0.41	0.89			19.1	171	443	319	841	331	28.6	476	35.8		2969	46.2	116	17.1	71.3	17.9	2.52	11.9		5.19		1.92		1.93	0.3	11.7	1.79	59.8	135	16.5
Guo et al. (2015)	South Tibet	XB-06	54.64	1.49	12.99	6.13802	0.12	7.97	5.62	2.71	7.5	0.82	1.85			17.3	164	429	347	827	637	19.1	613	13.3		2508	109	287	42.3	187	49	6.73	27.2		6.41		1.63		1.45	0.22	19.8	1.24	73.8	279	39.3
Guo et al. (2015)	South Tibet	XB1307	58.05	1.11	14.02	6.03805	0.09	6.28	5.2	2.53	5.87	0.81	1.06			17.6	124	244	106	443	710	19.3	372	23.4		2268	76.4	170	24.8	115	23.5	3.69	12.8		5.31		2.02		1.66	0.25	10.9	1.4	53.3	133	20.2
Guo et al. (2015)	South Tibet	XB-24	56.78	1.52	11.47	5.97807	0.13	8.75	4.85	2.29	6.96	1.28	1.79			16.3	183	358	353	709	758	36.9	784	16.4		2739	84.1	225	33.2	152	40.6	7.06	32.9		7.92		2.78		2.29	0.33	20.3	1.65	79.7	289	41.2
Guo et al. (2015)	South Tibet	ZFC004	53.81	1.73	11.87	6.45792	0.12	8.03	7.71	2.34	6.77	1.16	2.27			19.8	120	574	504	531	706	34.9	729	43.2		3271	164	352	47.3	186	36.7	4.91	23		9.16		3.16		2.31	0.34	23.8	1.98	120	116	31.7
Guo et al. (2015)	South Tibet	ZFC008	55.63	1.56	12.44	6.96775	0.11	7.1	6.51	1.75	6.86	1.07	1.83			18.4	133	486	314	464	824	32.3	571	31.7		2850	149	347	43.8	173	30.2	5.63	24.2		8.24		2.67		1.96	0.29	20	2.01	128	127	25.2
Guo et al. (2015)	South Tibet	ZFC009	54.39	1.57	12.85	6.64786	0.13	8.4	6.7	1.73	6.41	1.16	2.36			19	148	536	483	428	855	35.4	893	59.4		2713	152	341	48.3	191	37.2	5.42	22.1		8.76		2.91		2.19	0.31	26.4	3.39	115	163	27.8
Zhao et al. (2009)	South Tibet	CQ01	51.79	1.42	11.41	11.3507	0.1	10.92	5.92	1.91	6.57	1.09	0.54	98.49	13.2	17.5	125	561	372	451	1144	32.2	643	32.7	52.89	3387	126.8	344	54.2	261	48.6	7.56	27.6		9.7		3.17		2.1	0.3	18.6	1.9	89	215.6	32.25
Zhao et al. (2009)	South Tibet	CQ03	51.48	1.56	11.53	12.1294	0.11	9.96	6.03	1.48	6.45	1.26	1.14	98.11	28.7	19.6	127	610	341	331	1343	39.5	831	43.2	6.96	5513	175.3	455	67.2	310	59.5	8.65	33.2		11.9		3.79		2.37	0.33	22.8	2.44	121	298	19.52
Zhao et al. (2009)	South Tibet	G-029	55.97	1.58	11.97	5.5982	0.05	8.33	6.96	1.3	7.43	0.81	1.83			17	138	360	218	463	1420	21.4	1038	63		4179	353	735	91.6	359	64.4	6.18	16.6		6.15		1.86		1.64	0.24	27.4	3.82	189	140	17.3
Zhao et al. (2009)	South Tibet	GGP-7	45.39	0.83	10.34	10.9327	0.13	12.3	10.09	1.42	5.96	0.66	1.81	96.81	24.2	22.3	125	401	319	298	2169	39	283	12.8	25.88	10170	144	257	33.7	133	25	7.46	20.2		9.6		3.55		2.65	0.39	6.7	0.71	284	69.6	11.38
Zhao et al. (2009)	South Tibet	GR2	53.53	1.17	13.02	6.74	0.12	7.54	5.8	2.69	6.15	1.13	1.19	99.173	10.0225	23.0675	120.267	392.668	266.067	254.243	1519.94	29.89	548.11	25.6	3.015	2662.53	123.147	215.167	32.945	136.893	17.86	3.585	10.43		5.9725		2.825		2.5875	0.3735	14.1925	1.20225	36.9575	72.09	6.8825
Zhao et al. (2009)	South Tibet	SL0621	54.6	1.4	13	13.5749	0.1	9	5.5	1.7	5.9	0.9	0.7	99.7		18.7	138	470	283	389	942	29.5	568	33.9	10.69	2474	104.1	271	37.8	169	31.9	5	16		6.4		2.7		2.19	0.29	15.7	1.89	56	189	21.82
Zhao et al. (2009)	South Tibet	SL0623	56.4	1.3	12.1	12.8417	0.1	8.9	5.2	1.6	5.9	0.8	0.9	99.5		17.7	128	459	309	499	814	26.2	540	31.4	17.72	2084	97.4	258	36.1	162	29.9	4.52	14.6		5.9		2.48		1.88	0.27	14.7	1.75	49	174	21.68
Zhao et al. (2009)	South Tibet	SL0624	56.8	1.4	12.1	13.0528	0.1	9.3	5.1	1.7	5.9	0.8	0.1	99.8		17.3	130	426	252	583	873	27.2	562	30.7	24.75	2310	102.8	266	37.8	168	32.1	4.96	15.6		6.2		2.59		2.03	0.28	15.3	1.73	50	188	23.65
Zhao et al. (2009)	South Tibet	SL0625	56.7	1.4	13.5	13.2639	0.1	6.2	5	2.2	5.7	0.8	1.5	99.8		17.8	130	364	124	507	761	28.2	517	30.7	14.45	2137	98.6	232	32.8	142	26.5	4.15	13.9		5.9		2.52		1.94	0.28	13.9	1.64	44	147	19.22
Zhao et al. (2009)	South Tibet	SL0630	54.07	1.59	12.5	13.3838	0.1	9.51	5.45	1.69	6.6	0.94	0.47	99.64		18.25	144.69	496	144.46	601	939	30.4	621	34.48	8.12	2480.37	118.5	310	46.3	206	40	6.11	19.5		7.3		2.74		2.13	0.29	16.9	1.88	44	217.61	25.01
Zhao et al. (2009)	South Tibet	SL0631	55.7	1.4	13.6	13.5749	0.1	7.5	5.7	2.5	5.3	0.8	0.4	99.8		17.3	144	368	209	434	1003	25.1	491	29.6	9.6	2269	102.4	257	36	156	29.7	4.8	15.1		5.9		2.33		1.71	0.23	13	1.6	49	170	19.92
Zhao et al. (2009)	South Tibet	XR01-3	52.22	1.41	11.51	11.3762	0.11	10.99	6.06	2.04	6.14	1.12	0.73	99.32	16.4	18.6	125	670	395	2518	1264	33.6	679	34.6	348.3	4044	146.6	386	59.1	269	51.6	7.52	28.9		10.3		3.39		2.15	0.3	19.6	2.02	99	239.4	33.89
Zhao et al. (2009)	South Tibet	XR02-1	52.47	1.51	12.76	9.26772	0.1	6.42	6.17	1.87	8.03	1.18	0.9	97.48	15.9	17.1	114	266	165	873	1057	38.1	809	54.3	52.64	2893	128.4	335	52.7	239	48.5	6.8	28		11		3.67		2.4	0.35	25.1	3.3	133	242	41.13
Li et al. (2021)	South Tibet	MBL15-01	57.7	1.742	11.72	5.756	0.077	6.344	5.294	1.549	8.676	0.537	/	99.395		13.211	123.306	337.654	182.04	476.839	872.147	23.1685	1021.34	39.1296	8.93574	2784.47	161.05	377.416	48.785	196.859	29.8877	4.63737	12.1195	1.31485	3.28374	0.878323	2.09236	0.270617	1.67356	0.239712	26.7305	2.01862	72.7232	135.887	4.30075
Li et al. (2021)	South Tibet	SLP-04	56.37	1.375	12.54	6.6795	0.095	8.55	5.43	1.78	5.86	0.93	0.44	100.6		17.3	127	473	325	453	857	24	525	26.2	21.1	2094	96.2	249	34.2	149	29.5	4.41	13.3	1.27	5.5	0.88	2.31	0.311	1.84	0.253	13.4	1.39	56	170	21.5
Li et al. (2021)	South Tibet	SLP-11	56.2	1.364	12.25	6.5618	0.106	7.57	5.2	1.77	5.8	0.9	0.89	99.04		17.6	133	461	240	503	894	25	548	24.7	18.5	2174	102	264	36.5	162	31.5	4.85	14.9	1.4	5.85	1	2.62	0.324	1.91	0.277	14.1	1.39	55	178	23.3
Li et al. (2002)	South Tibet	96YN131	55.69	0.66	13.58	6.3	0.11	6.32	4.61	3.07	6.7	0.53				12	121	218	136	245	1087	22.6	71.8	8.92	5.07	2148	39.6	77	9.9	38.9	7.59	1.95	6.34	0.87	4.57	0.84	2.41	0.32	2.13	0.31	2.18	0.6	33.2	15.3	5.34
Li et al. (2002)	South Tibet	96YN132	54.39	0.7	12.61	6.68	0.11	7.16	5.63	2.75	6.44	0.62				14.1	132	262	165	233	1418	23	95.6	8.44	5.39	2989	38.8	75.4	9.9	39.3	7.85	1.91	6.66	0.89	4.6	0.85	2.43	0.33	2.08	0.31	2.83	0.61	24.5	15.5	5.26
Li et al. (2002)	South Tibet	96YN135	52.4	0.74	12.39	6.75	0.12	6.38	6.27	2.31	6.32	0.66				15.4	126	264	171	227	1088	24.5	86.7	9.05	5.85	2038	43.1	84.7	10.6	42.5	8.37	2.15	6.97	0.96	4.98	0.91	2.54	0.34	2.22	0.33	2.55	0.63	36.6	16.2	5.9
Li et al. (2002)	South Tibet	96YN140	48.56	0.55	9.97	7.79	0.14	14.93	7.05	0.99	5.14	0.48				16.5	138	1022	433	221	1323	16.7	97.9	4.61	22.1	1748	23	46.5	6.14	25.6	5.21	1.32	4.51	0.61	3.26	0.61	1.76	0.24	1.6	0.25	2.47	0.3	181	8.53	2.98
Li et al. (2002)	South Tibet	96YN141	50.58	0.86	11.88	8.44	0.1	9.72	6.68	2.32	6.32	0.77				14.5	136	415	244	259	1735	19.6	104	7.28	27	4315	33.4	64.3	8.45	33.7	6.79	1.67	6.18	0.77	3.95	0.73	2.04	0.27	1.74	0.26	2.7	0.51	15.7	13.5	4.65
Li et al. (2002)	South Tibet	96YN143	47.77	0.57	9.48	8.32	0.15	16.32	6.88	0.86	4.65	0.49				18.8	141	1050	503	223	996	16.7	92.5	4.42	26.7	1658	22.4	44.7	6.09	25.4	5.25	1.36	4.55	0.61	3.25	0.61	1.76	0.24	1.55	0.24	2.41	0.3	123	8.11	2.76
Li et al. (2002)	South Tibet	96YN144	53.12	0.83	12.3	7.12	0.12	8.3	6.66	2.79	5.95	0.73				15.6	138	338	170	233	1267	26	88.7	8.4	6.71	1653	35.7	70.9	9.47	38.2	8	2.03	7.06	0.99	5.21	0.94	2.56	0.34	2.14	0.32	3.18	0.54	24.8	9.28	3.28
Tian et al. (2017)	South Tibet	GJ10-9-1	53.45	1.54	11.92	8.64898	0.11	8.55	5.69	1.96	7.15	1.13	0.05	97.8284	15.1	25.9	153	480	202	590	1306	41.1	719	37.2		4294	154	422	55.4	239	45.5	7.19	23.4	2.8	9.52	1.53	4.06	0.4	2.34	0.34	19	2.09	86.9	216	26.8
Tian et al. (2017)	South Tibet	GJ10-9-2	53.87	1.54	12.01	8.69898	0.11	8.6	5.68	1.98	7.19	1.12	0.11	98.4814	15.3	26.1	153	496	204	583	1304	40.1	730	38		4287	151	401	53	229	43.9	6.73	22.8	2.82	9.63	1.41	3.9	0.39	2.28	0.36	18.5	2.03	86.2	213	26.8
Tian et al. (2017)	South Tibet	GJ10-10-1-1	55.94	1.43	12.27	7.21098	0.09	7.13	5.15	1.82	6.36	0.91	0.8	98.096	12.9	23.8	129	504	279	648	972	33.2	652	31.1		2556	118	321	43.5	194	35.5	5.38	16.7	2.05	7.33	1.13	3.25	0.35	2.11	0.3	16.5	1.72	44.8	182	23.5
Tian et al. (2017)	South Tibet	GJ10-10-1-2	56.17	1.44	12.76	6.54998	0.1	6.46	5.07	1.9	6.17	0.86	1.08	98.2371	11.2	21.8	128	482	259	641	940	37.2	627	31		2416	113	301	40.6	185	34.3	5.13	16.1	2.04	7.5	1.27	3.73	0.37	2.4	0.35	15.5	1.72	51.1	169	23
Tian et al. (2017)	South Tibet	GJ10-10-2	56.49	1.4	11.82	8.67898	0.11	8.58	4.88	1.78	6.2	0.86	0.3	98.3385	13.8	23.2	136	538	290	689	970	34	666	31.5		2610	114	312	42.8	189	34.9	5.09	16.2	2.02	7.24	1.14	3.36	0.36	2.3	0.35	16.4	1.73	53.4	183	24.5
Tian et al. (2017)	South Tibet	GJ10-10-3-1	55.71	1.46	12.01	8.42998	0.1	8.34	5.12	1.84	6.63	0.94	0.54	98.6004	12.6	21.1	127	489	245	694	1000	31.5	668	31.4		2583	120	332	44.6	195	36.6	5.46	16.6	2.04	7.03	1.11	3.09	0.32	1.92	0.29	16.8	1.75	60.8	191	25.6
Tian et al. (2017)	South Tibet	GJ10-10-3-2	56.57	1.4	11.88	8.68798	0.12	8.58	4.91	1.77	6.23	0.87	0.42	98.6945	13.1	21.3	131	521	287	691	958	33.2	657	31.3		2604	113	307	41.9	186	34.7	5.36	15.7	2.01	7.14	1.08	3.17	0.34	2.1	0.31	16.4	1.68	55.6	183	24.5
Tian et al. (2017)	South Tibet	GJ10-10-4	56.89	1.37	12.22	8.47798	0.12	8.37	5.01	1.89	5.76	0.81	0.17	98.6726	12.6	20	126	469	310	600	905	30.2	590	28.4		2244	98.8	274	36.3	162	30.1	4.63	14.1	1.77	6.62	1.04	2.96	0.33	2.1	0.31	14.4	1.54	50.3	157	21.5
Tian et al. (2017)	South Tibet	GJ10-10-5	56.64	1.4	12.05	8.89898	0.11	8.8	4.99	1.84	6.02	0.85	-0.05	98.6676	13.1	20.4	129	482	241	629	966	32	625	30.1		2334	104	290	38.5	172	31.6	4.76	14.3	1.87	6.88	1.1	3.07	0.31	2.09	0.31	15.6	1.77	54.3	169	22.9
Tian et al. (2017)	South Tibet	GJ10-10-6	56.82	1.4	12.19	8.92898	0.11	8.83	5.01	1.94	5.92	0.85	-0.07	99.0246	14.9	22	128	479	253	622	939	30.6	600	29.5		2327	105	278	38.4	173	32.1	4.77	14.1	1.87	6.67	1.11	3.17	0.33	2.09	0.33	15.1	1.69	55.4	165	22.2
Tian et al. (2017)	South Tibet	GJ10-10-7	56.69	1.41	12.09	9.04898	0.11	8.95	5.04	1.96	5.91	0.84	-0.09	98.9656	14.9	23.7	136	518	279	634	965	31.6	609	29.7		2466	107	287	39.4	178	33.5	4.89	15	1.86	6.64	1.05	3.15	0.32	2.11	0.31	15.4	1.62	53.9	166	22.7
Tian et al. (2017)	South Tibet	9T132	49.71	1.08	11.85	—	0.24	7.18	10.34	1.62	6.17	1.34	2.63	99.65	—	—	—	123	117	676	1490	40	511	25		3209	142	314	39	156	31	7.1	22	2.5	9.8	1.5	3.8	0.4	2.3	0.3	13	1.6	93	129	18
Tian et al. (2017)	South Tibet	CHZ-10	53.9	1.63	12.73	6.12898	0.11	6.03	6.59	1.34	8.61	1.26	0.73	98.7683	19.4	19.1	145	322	188	529	861	35.5	965	75		3263	139	354	54.2	243	45.7	6.86	26.6	2.45	9.61	1.43	3.34	0.4	2.31	0.32	26.5	4.17	144	139.3	24.5
Tian et al. (2017)	South Tibet	C10	56.14	1.43	12.57	6.47	0.14	6.19	6.85	2.14	7.16	0.91	0.79	100.79	—	16.39	151.79	294.43	184.73	938.3	879.4	46.8	481.2	27.7		1973.2	131.6	327.8	46.3	182.5	42.4	5.55	23.9	2.67	10.12	1.53	3.64	0.46	2.68	0.37	13.9	1.81	98.6	123.3	21.8
Tian et al. (2017)	South Tibet	C76	55.87	1.52	12.77	6.83	0.12	6.43	7.25	2.26	6.03	0.92	1.16	101.16	—	18.52	137.09	331.48	176.43	1046.3	612.8	31.6	979.5	55.4		2375.8	140.7	341.8	45.9	184.5	44.3	6.87	22.6	1.94	7.62	1.17	3.01	0.39	2.38	0.39	24.7	3.16	125.1	247.9	26.7
Tian et al. (2017)	South Tibet	CH4	56.53	1.55	12.84	7.35	0.11	6.76	7.01	1.83	5.35	0.67	1.04	101.04	—	19.37	148.86	362.14	199.45	1358.7	1037.6	35.4	1082.9	52.5		3371.4	151.5	393.7	57.4	268.9	51.2	7.13	28.5	2.54	9.77	1.38	2.71	0.32	1.88	0.26	30.3	3.02	182.1	252.9	33.2
Tian et al. (2017)	South Tibet	CH7	52.76	1.45	11.37	7.42	0.13	10.51	7.19	2.48	5.83	0.86	0.58	100.58	—	17.92	131.9	610.34	418.36	894.2	847.1	29.6	809.5	36.8		2433	148.5	410.1	61.2	275	59.3	8.18	34.7	3.11	9.6	1.34	2.76	0.37	2.19	0.32	22.4	2.77	82.3	211.9	24.8
Tian et al. (2017)	South Tibet	C03	53.64	1.63	11.85	6.71	0.11	10.79	6.99	2.12	5.14	1.02	0.49	100.49	—	18.94	128.77	686.39	386.42	1204.8	798.5	37.9	621.3	61.6		3516.4	150.3	388.2	54.7	236.9	48.7	6.8	26.4	2.36	9.61	1.32	2.98	0.35	2.12	0.31	16.9	3.54	157.6	231.7	27.8
Tian et al. (2017)	South Tibet	CX38	55.63	1.49	12.34	7.56	0.09	7.08	7.34	2.59	4.81	1.07	0.72	100.72	—	17.09	140.58	347.45	301.95	536.5	846.2	21.3	502.1	21.7		2001.5	114.6	291.4	42.1	186.5	36.3	5.11	18.7	1.65	6.59	1.04	2.4	0.31	1.79	0.25	14.5	1.57	87.8	138.3	23.1
Tian et al. (2017)	South Tibet	C25	57.18	1.62	12.09	5.52	0.14	6.61	6.75	2.48	6.49	1.12	0.93	100.93	—	18.63	131.47	393.26	187.28	498.4	676.1	24.6	412.7	26.5		1785.4	102.7	241.8	34.1	139.3	29.5	3.39	14.8	1.36	6.29	0.95	2.14	0.28	1.77	0.27	12.9	1.66	71.7	149.3	16.5
Liu et al. (2014)	South Tibet	08YR05	57.9	1.06	12.8	6.09	0.09	6.75	5.32	2.17	5.69	0.79	1.06	99.7		16.6	131	318	179	527	659	22.7	390	24.4	29.9	1982	57.9	141	21.4	96.3	20	3.28	9.7	1.07	4.58	0.82	2.05	0.29	1.76	0.25	10.9	1.29	46.8	135	17.9
Liu et al. (2014)	South Tibet	10XB12	58	1.19	13	5.8	0.09	6.29	4.96	2.23	6.82	1.01	1.02	100.4		16.3	109	517	234	477	741	27.3	508	36.3	32.7	2208	67.2	182	29.5	135	25.8	3.89	13.6	1.56	6.19	0.91	2.48	0.29	1.7	0.24	15.2	2.17	87.2	127	16
Liu et al. (2014)	South Tibet	10XB13	57.7	1.21	12.7	5.87	0.09	6.31	5.06	2.15	6.63	0.97	1.07	99.8		16.3	110	510	256	456	734	26.6	513	37.4	30.1	2175	65.6	178	29	132	24.6	3.76	13.1	1.51	5.94	0.91	2.39	0.28	1.69	0.24	15.3	2.17	83	123	16.8
Liu et al. (2014)	South Tibet	10YR04	57.2	1.15	12.7	5.9	0.09	6.63	5.51	1.87	6.13	1.02	1.58	99.8		15.7	130	329	233	518	640	21.7	405	25.7	32	1827	57.4	144	22.5	98	19.9	3.12	10	1.12	4.49	0.71	2.11	0.26	1.53	0.24	11.1	1.3	46.2	131	17.5
Liu et al. (2014)	South Tibet	10YR04a	58.1	1.13	12.7	5.72	0.09	6.26	5.15	1.91	6.37	0.95	1.31	100.2		15.4	126	296	230	511	624	21.3	395	24.6	31	1760	55.7	141	22.6	93.8	19.5	3.1	9.92	1.12	4.38	0.7	2.04	0.24	1.5	0.23	10.8	1.27	46	131	17.4
Liu et al. (2014)	South Tibet	10YR07	58	1.15	12.9	5.85	0.1	6.58	5.34	1.9	6.3	1.07	1.02	100.2		15.5	127	325	192	523	636	21.4	407	25	31.8	1824	57.3	143	22.4	105	19.8	3.11	9.9	1.12	4.47	0.69	1.99	0.26	1.56	0.23	11	1.3	46.5	131	17.4
Miller et al. (1999)	South Tibet	TE126/93	53.48	1.34	13.91	7.47	0.11	6.87	4.65	2.17	6.34	0.83	1.84	99.01		17	128	496	203	465	792	24	635	37		2718	119	284	39	200	31	4.4	16	1.5	6.2	0.81	2.2	0.23	1.3	0.24	17.7	2.5	93	192	20
Miller et al. (1999)	South Tibet	TE127/93	55.13	1.37	13.18	7.25	0.11	6.68	4.6	2.14	6.6	0.78	2.27	100.11		18	130	494	212	437	787	24	609	38		2715	118	290	39	171	32	4.6	17	1.7	6.6	0.9	2.2	0.26	1.4	0.22	18.2	2.7	88	188	21
Miller et al. (1999)	South Tibet	TE131/93	53.76	1.29	14.32	6.7	0.1	6.82	5.53	2.52	5.98	0.83	1.13	98.98		18	109	384	202	466	802	26	589	40		2397	112	269	36	155	29	4.3	15	1.5	5.6	0.79	2	0.23	1.3	0.22	19.1	2.8	88	160	22
Miller et al. (1999)	South Tibet	TE137/93	53.64	0.91	12.05	6.65	0.12	10.16	4.65	1.62	6.71	1.1	0.86	98.47		13	115	528	358	702	990	30	392	23		3488	84	207	30	144	30	5.3	16	1.8	7.8	1.14	2.5	0.31	2.1	0.3	11.2	1.3	79	169	22
Miller et al. (1999)	South Tibet	TE138/93	57.73	0.87	12.18	6.31	0.12	7.14	4.27	2.11	6.19	0.91	1.08	98.91		12	109	368	230	523	1042	28	387	24		3416	89	206	29	145	29	4.7	16	1.7	6.9	1.01	2.5	0.29	1.9	0.27	10	1.3	87	157	20
Miller et al. (1999)	South Tibet	TE117/93	57.98	1.01	12.14	5.87	0.12	6.83	4.64	2.51	6.48	1.02	0.64	99.24		12	120	377	193	753	842	27	461	29		2160	81	197	29	145	31	4.8	15	1.6	6.6	0.91	2.3	0.26	1.7	0.25	12.5	1.6	52	165	23
Miller et al. (1999)	South Tibet	TE118/93	57.41	1.03	12.35	6.21	0.15	6.72	4.62	2.47	6.29	0.97	0.72	98.94		14	128	419	169	712	802	28	454	26		2292	85	203	30	135	30	4.9	14	1.5	5.8	0.91	2.3	0.28	1.6	0.24	13	1.6	53	186	26
Cheng & Guo (2017)	South Tibet	SLP1313	47.4	1.11	10.8	7.82	0.13	14.5	8.73	0.55	7.96	1.03				25.2	113	610	284	655	1643	38.7	306	13		6436	282	577	71.9	300	54.7	10.6	37.6	3.68	12	1.61	3.3	0.35	1.95	0.26	7.97	0.7	96.7	128	9.73
Cheng & Guo (2017)	South Tibet	SLP1314D	46.9	1.42	10.7	8.28	0.13	13.9	8.78	0.86	7.9	1.15
Cheng & Guo (2017)	South Tibet	SLP1323	56.4	1.4	12.6	6.57	0.11	8.82	5.51	1.9	5.84	0.9				18	122	421	303	447	845	25.6	540	29.9		2282	97.2	244	34.7	162	29.2	4.28	16.1	1.6	5.95	0.99	2.39	0.32	1.88	0.27	15.5	1.73	53.3	167	20.1
Cheng & Guo (2017)	South Tibet	SLP1319	54.8	1.5	12.4	6.83	0.18	8.76	5.24	2.02	7.1	1.12				19.9	140	465	279	518	1009	30.8	678	36.2		3776	112	288	42.6	209	41.8	5.8	21.6	2.14	7.86	1.23	2.83	0.37	2.18	0.32	18.2	2.1	80.2	242	29.2
Cheng & Guo (2017)	South Tibet	SLP1306	56.3	1.52	12	6.04	0.1	8.76	5	1.91	7.16	1.17				18.8	116	486	328	735	738	34.6	656	34.8		2907	96.2	269	43	216	46.2	6.39	23.6	2.38	8.62	1.34	3.1	0.39	2.25	0.33	19.5	2.05	80.9	293	37.2
Cheng & Guo (2017)	South Tibet	SLP1317	57.5	1.43	12.3	6.46	0.1	8.5	4.62	1.82	6.37	0.93				17.4	122	412	309	645	831	26.7	631	29.5		2456	103	259	37.2	181	32.7	4.62	17.4	1.75	6.47	1.07	2.54	0.33	2.07	0.3	16.6	1.74	46.8	177	23
Cheng & Guo (2017)	South Tibet	SLP1316	54.9	1.51	13.6	6.86	0.1	8.34	5.5	2.42	5.89	0.93				18	137	415	199	520	943	25.4	564	31.9		2489	119	294	41.9	195	35	5.21	19.2	1.88	6.64	1.11	2.62	0.32	1.89	0.27	15.3	1.85	53.5	192	22.8
Cheng & Guo (2017)	South Tibet	SLP1303	56.5	1.41	12.5	6.23	0.1	8.22	5.22	1.95	6.77	1.03				20.8	128	479	346	620	843	35.9	622	34.1		3286	90.9	238	36.3	182	39.1	5.93	21.6	2.3	8.65	1.36	3.25	0.4	2.39	0.34	17.2	2	102	236	31.3
Cheng & Guo (2017)	South Tibet	SLP1315	55.3	1.51	13.5	6.85	0.11	8.04	5.4	2.45	5.95	0.94				17.9	134	361	201	557	935	24.8	573	29.9		2521	108	270	38	180	33.4	4.99	17.8	1.75	6.46	0.99	2.32	0.29	1.78	0.25	15.5	1.68	49.4	178	23.3
Cheng & Guo (2017)	South Tibet	SLP1324	55.4	1.15	13.4	6.06	0.09	8.21	5.32	2.44	6.91	1.03				17.2	119	386	237	469	1423	35	355	17.9		5974	124	253	32.7	144	28.7	5.56	20.8	2.27	8.79	1.34	3.02	0.38	2.24	0.32	9.61	0.9	105	93.4	9.28
Cheng & Guo (2017)	South Tibet	SLP1301	57	1.54	12	5.89	0.08	8.07	4.87	2	7.39	1.17				18.5	113	461	307	845	735	33.3	735	35.8		2712	105	294	47.3	231	48	6.58	23.9	2.35	8.3	1.31	2.98	0.37	2.14	0.31	20.6	2.09	75.6	297	40.2
Cheng & Guo (2017)	South Tibet	SLP1305	56.4	1.43	12.6	6.32	0.1	7.78	5.31	1.96	7.11	1.07				18.7	122	441	307	591	758	32.8	546	31.5		2948	83.8	221	33.7	170	37	5.48	20.1	2.11	7.98	1.27	2.91	0.37	2.23	0.32	16	1.85	90.6	221	28.5
Cheng & Guo (2017)	South Tibet	SLP1308D	55.7	1.54	13.7	6.91	0.14	7.55	5.33	2.73	5.64	0.77
Cheng & Guo (2017)	South Tibet	SLP1304	56.6	1.42	12.7	6.37	0.11	7.36	5.5	2.02	6.89	1.06				18.2	126	488	268	513	757	31.7	537	32.3		3160	87.9	222	34.3	170	36.2	5.43	20.3	2.15	7.98	1.27	2.99	0.38	2.22	0.32	14.8	1.86	79.9	203	26.5
Cheng & Guo (2017)	South Tibet	SLP1321	55.8	1.47	14.1	6.84	0.11	7.22	5.78	2.34	5.49	0.84				19.2	138	387	145	439	820	25.9	559	31.2		2099	98.5	232	32.7	152	26.7	3.95	15	1.53	5.88	0.98	2.38	0.32	1.92	0.28	15.9	1.72	48.4	142	17
Cheng & Guo (2017)	South Tibet	SLP1322	54.3	1.46	13.9	7.36	0.11	7.94	6.14	2.67	5.3	0.79				19.1	144	310	137	381	927	24	410	28.2		2399	99.3	228	31.6	144	25.5	4.14	15	1.53	5.73	0.93	2.19	0.29	1.77	0.25	11.3	1.63	62.9	155	16.2
Cheng & Guo (2017)	South Tibet	SLP1318	56.9	1.43	14.4	6.7	0.09	6.01	5.32	2.81	5.53	0.84				15.1	129	233	121	382	857	20.2	460	32.1		2250	93.9	210	28.6	124	21.2	3.39	12.7	1.32	5.22	0.82	2.04	0.26	1.55	0.23	12.5	1.94	59.8	127.2	17.3
Wang et al. (2014)	South Tibet	05S2-7	58.64	1.53	11.59	5.74	7.53	0.07	3.47	1.54	8.53	0.47	0.89	100		15.4	111	278	217	602	634	21.7	722	35.3		2939	40.8	123	22.1	111	25.4	3.83	11.9	1.23	4.74	0.72	1.79	0.23	1.53	0.21	19.1	2.06	60.2	232	34.4
Wang et al. (2014)	South Tibet	05S2-8-1	58.77	1.51	11.34	5.68	7.57	0.07	3.71	1.71	8.04	0.73	1.1	100.24		14.8	104	304	219	6142	701	24.3	717	34.9		3007	56.7	162	27.8	132	28.7	4.35	13.2	1.34	5.01	0.75	1.94	0.25	1.6	0.23	18.5	2	65.4	240	37.4
Wang et al. (2014)	South Tibet	05SLP5-05	58.14	1.38	12	6.66	7.97	0.09	3.91	1.67	6.57	0.34	0.58	99.3		14.9	121	312	209	580	920	22.6	603	28.1		2402	55.4	145	23.8	109	21.9	4.24	10.1	1.15	4.54	0.77	1.95	0.26	1.67	0.24	14.4	1.63	44.4	160	22
Wang et al. (2014)	South Tibet	05SLP5-06	57.95	1.39	12.58	6.06	7.37	0.08	4.35	1.77	6.55	0.37	0.62	99.1		14.2	109	344	192	459	956	20.7	603	31		2458	73.8	175	26.4	111	20.8	3.76	9.43	0.99	4	0.66	1.65	0.24	1.5	0.22	14.2	1.75	51	153	20.6
Wang et al. (2014)	South Tibet	05SLP5-7	56.6	1.52	12.2	6.53	8.32	0.09	4.3	1.9	7.05	0.4	0.55	99.45		15.7	132	415	112	604	987	21.7	651	30.9		2507	67.8	174	27.6	121	23.7	4.69	10.7	1.12	4.42	0.67	1.74	0.23	1.52	0.21	15.5	1.72	42.9	178	23.5
Wang et al. (2014)	South Tibet	05SLP5-09	56.53	1.49	10.85	6.01	7.93	0.08	3.88	1.6	7.56	0.71	2.61	99.25		12.8	100	353	185	725	826	27.8	746	32.6		2541	118	279	45	189	34.1	4.83	15.6	1.52	5.42	0.83	2.1	0.27	1.77	0.25	18	1.82	48.3	184	24.6
Wang et al. (2014)	South Tibet	S05SLP5-10	56.45	1.34	13.32	6.93	6.81	0.09	4.73	2.43	6.37	0.32	0.78	99.58		13.2	116	283	88	389	1145	21.6	509	28.6		3220	63.9	153	23.4	102	19.9	4.57	10.5	1.1	4.29	0.69	1.73	0.23	1.49	0.21	11.3	1.63	74.5	138	16.7
Wang et al. (2014)	South Tibet	05SLP5-11	56.98	1.43	13.39	6.78	6.84	0.09	4.2	2.35	6.41	0.11	0.48	99.06		12.4	111	271	147	475	1005	16.3	593	27.7		2691	50.1	114	17.5	75	15.5	4.14	8.11	0.82	3.31	0.52	1.34	0.18	1.18	0.17	13.7	1.56	54	126	19.2
Wang et al. (2014)	South Tibet	05SLP5-16	54.46	1.5	12.26	7.67	8.96	0.1	5.3	1.87	6.74	0.22	0.37	99.45		20.5	159	460	142	476	854	24.8	633	35.3		2567	46.3	132	22.7	109	23.6	4.3	11.3	1.24	5.12	0.83	2.07	0.28	1.71	0.24	15.7	2.18	60.7	169	20.2
Wang et al. (2014)	South Tibet	05SLP4-01	46.1	1.3	8.77	9.09	13.7	0.13	9.47	0.29	6.42	1.04	3.05	99.36		25.7	188	452	254	675	5274	55.1	501	17.8		12549	268	555	82	319	59	12.5	38.4	3.77	12.8	1.68	3.74	0.41	2.6	0.34	10.3	1.1	158	136	12.4
Wang et al. (2014)	South Tibet	05SLP4-02	51.29	1.6	10.93	7.67	10.16	0.11	6.22	1.17	7.33	0.75	2.66	99.89		17.7	164	290	216	523	1728	32.8	734	31.9		5569	150	303	46.8	191	35	6.81	20.3	1.97	7.37	1.07	2.34	0.29	1.88	0.26	17.1	1.81	103	151	12.8
Wang et al. (2014)	South Tibet	05SLP4-03	49.82	1.44	9.8	8.87	11.42	0.12	7.23	1.12	8.9	0.67	0.9	100.29		2.97	158	329	257	520	1519	34.1	657	26.4		6642	188	396	60.4	238	44.6	9.17	25.6	2.67	9.38	1.29	2.86	0.33	2.13	0.29	13.7	1.45	122	55.9	11.3
Wang et al. (2014)	South Tibet	05SLP4-04	52.77	1.66	10.21	7.95	9.82	0.1	5.89	1.46	8.32	0.74	1.15	100.08		17.9	159	321	231	892	1626	33.1	745	32		5794	142	294	45.7	185	34.5	6.58	18.9	1.96	7	0.99	2.28	0.28	1.88	0.26	17.4	1.82	96.4	143	12.6
Huang et al. (2015)	South Tibet	CM10-04-04	56.63	1.66	10.83	6.07	0.08	7.18	5.49	1.75	6.89	0.3	3.1	99.96		17.3	103.9	396.1	210.4	753.9	838.8	15	952.5	53.2		4465.3	113.61	260.2	34.78	138.1	20.13	3.16	9.9	1.03	4.48	0.65	1.81	0.22	1.3	0.2	26.9	3.5	67.8	117.9	4.1
Huang et al. (2015)	South Tibet	CM10-04-05	57.64	1.75	11.49	5.15	0.08	6.76	5.18	0.91	7.8	0.12	2.7	99.63		21.5	136.1	455	227.8	252.9	623.3	13.7	919.6	55.6		5216.7	115.61	257.5	34.74	131.9	19.45	2.87	9.18	0.92	4.15	0.62	1.65	0.2	1.27	0.19	25.4	2.9	83	123.9	3
Huang et al. (2015)	South Tibet	CM10-04-08	55.95	1.69	11.04	5.99	0.07	7.53	5.61	1.56	6.63	0.55	3.1	99.67		26.9	115.8	360.4	213.3	604.1	984.5	16.2	885.9	52		3881.1	122.96	269.9	35.32	128.6	18.53	2.92	8.3	0.86	3.91	0.58	1.61	0.17	1.15	0.17	20.9	2.3	57.2	108.4	5.1
Huang et al. (2015)	South Tibet	CM10-04-12	55.99	1.56	11.1	7.53	0.08	6.96	5.84	1.77	6.11	0.08	2.5	99.49		22.2	146.6	449.6	215.2	504.3	999.8	12.8	740.5	52.7		3626.3	49.65	153.4	19.6	82.07	14.62	2.37	7.66	0.83	3.67	0.57	1.62	0.21	1.36	0.2	20.5	3	77.9	165.9	16.3
Huang et al. (2015)	South Tibet	CM10-04-17	56.61	1.49	11.92	6.01	0.13	6.13	6.16	1.92	6.94	0.41	2.4	100.09		24.5	154	343.5	194.5	438.4	1083.7	15	752.7	50		3564.2	90.25	208.3	28.82	112.4	18.61	2.84	9.21	0.97	4.13	0.66	1.82	0.22	1.41	0.22	20.4	2.7	111.9	145.2	18
Huang et al. (2015)	South Tibet	CM10-04-21	58.17	1.45	12.3	4.85	0.1	6.14	5.69	1.62	7.3	0.26	2	99.88		21.7	151.3	332.8	121.2	368.1	1112.2	13	789.7	53.3		3605.8	71.42	170.2	24.08	94.58	15.21	2.48	7.69	0.82	3.66	0.57	1.53	0.18	1.14	0.21	20.2	2.8	95.5	152.1	6.7
Huang et al. (2015)	South Tibet	CM10-04-22	59.1	1.62	11.19	5.04	0.06	6.35	4.13	1.27	8.97	0.11	1.7	99.52		18.1	123.3	366.4	194.3	590.9	507.4	12.1	925.1	45.1		3695.2	67.98	174.2	25.2	101.3	16.26	2.42	8.05	0.83	3.56	0.53	1.47	0.17	1.08	0.18	26.7	2.7	54.2	107	2.2
Huang et al. (2015)	South Tibet	CM10-04-27	58.52	1.63	11.72	5.25	0.06	6.5	4.13	1.18	9.27	0.09	1.1	99.47		18.5	122.8	350.7	217.3	516.9	565.3	12.3	929.6	43.8		3334.3	86.66	200.8	28.06	108.9	16.26	2.28	6.55	0.73	3.21	0.48	1.35	0.16	0.99	0.18	23	2.2	34.8	97.3	3
Huang et al. (2015)	South Tibet	CM10-04-28	59.15	1.65	12.02	5.11	0.06	6.03	3.9	1.27	9.31	0.06	1.2	99.7		16.2	123.2	364.5	187	488.4	491.4	12.7	964	46.8		3394.7	81.67	198	27.75	113.1	17.27	2.52	7.6	0.8	3.56	0.54	1.51	0.19	1.13	0.19	25.7	2.4	46.9	115.8	4
Huang et al. (2015)	South Tibet	CM10-04-29	58.6	1.63	11.48	5.34	0.06	6.11	4.2	1.3	9.36	0.13	1.4	99.62		18.5	116.1	359	231.4	629.6	528.4	14.3	1009.5	48.7		3334.9	92.31	221.3	29.43	117.1	18.41	2.67	7.34	0.82	3.56	0.55	1.58	0.19	1.2	0.18	25.1	2.2	50.8	113.4	8.7
Huang et al. (2015)	South Tibet	CQQ4-04-01	55.7	1.55	11.37	6.98	0.09	10.11	5.01	1.94	6.5	0.14	0.9	100.24		21.9	154.7	728.9	305	381.3	1152.4	14.7	685.5	32.2		3737.1	26.05	86.04	16.11	80.11	19.07	3.46	10.07	1.04	4.08	0.59	1.48	0.19	1.18	0.17	20.7	1.9	103	201.7	33.8
Huang et al. (2015)	South Tibet	CQQ4-04-02	54.32	1.52	11.57	7.27	0.09	10.36	5.33	1.71	6.51	0.33	1.3	100.32		20.7	144.1	704.8	370.5	368.8	1167.2	21	688.6	33		3907.6	53.66	153.7	25.18	127.9	26.83	4.61	14.63	1.48	5.23	0.8	1.98	0.24	1.55	0.24	20.6	2	104.1	212.8	34.5
Huang et al. (2015)	South Tibet	CQQ4-04-03	54.83	1.52	11.45	7.2	0.09	10.24	5.12	1.58	6.74	0.19	1.2	100.16		21	143.1	677.4	310.2	327.1	1165.7	17.4	660.7	31		3660.7	34.79	111.3	20.12	100.8	22.7	3.94	12.03	1.23	4.82	0.71	1.8	0.21	1.36	0.2	20	1.8	105.7	200.8	32.5
Huang et al. (2015)	South Tibet	CQQ4-04-04	53.82	1.47	11.31	7.3	0.1	10.75	5.04	1.62	6.84	0.55	1.1	99.88		18	153.7	582.6	389.7	495	1045.3	20.6	674.6	31		3483.6	71.78	199.2	32.88	154.6	30.74	4.76	16.41	1.59	5.94	0.85	2.25	0.24	1.59	0.23	20	1.8	92.2	202.3	34.7
Huang et al. (2015)	South Tibet	CQQ4-04-05	56	1.46	11.26	6.27	0.08	10.66	4.14	1.38	8.23	0.42	0.5	100.37		18.1	125.1	592.8	382.3	635.9	684.2	17.5	685	28.8		3887.8	54.7	153	25.56	121.9	26.11	3.68	13.78	1.31	4.75	0.68	1.71	0.19	1.24	0.18	20.6	1.6	72.5	213.2	34.1
Huang et al. (2015)	South Tibet	CQQ4-04-06	55.64	1.53	11.28	6.24	0.08	10.21	4	1.38	8.27	0.24	0.8	99.68		18.1	132.5	593.5	377.3	662	671.5	14.8	798.8	33.9		3994.7	36.82	107.8	18.47	94.41	19.82	3.02	10.49	1.05	3.8	0.57	1.38	0.16	1.11	0.18	21.5	1.9	65.2	223.3	36.4
Huang et al. (2015)	South Tibet	CQQ4-04-09	56.89	1.52	11.45	5.71	0.07	9.33	3.92	1.38	8.42	0.12	1.2	99.98		18.2	122.7	584	336.5	701.9	564.8	12.8	752.9	31.9		4056	21.39	72.95	13.16	69.87	15.67	2.56	8.6	0.9	3.33	0.51	1.22	0.15	1.04	0.16	22.4	1.9	62.2	218.8	35.1
Huang et al. (2015)	South Tibet	CQQ4-04-10	55.2	1.52	11.33	6.9	0.09	10.38	4.54	1.64	7.03	0.11	1.1	99.84		19.6	144.7	711.8	381.1	434	1115	17.1	689.9	31.4		3609.3	23.45	86.47	16.07	86.93	20.21	3.6	10.71	1.15	4.39	0.68	1.62	0.2	1.31	0.19	19.9	1.8	96.4	208.8	32.7
Prelević et al. (2008)	Circum-Mediterranean	02CX05	55.77	1.56	9.18	5.47	0.08	11.51	3.58	0.87	9.07	1.15	0.68	99.097	46.06	16.15	91.2267	583.82	565.917	763.21	811.41	28.1867	811.783	54.9067	22.8167	1751.45	110.34	312.61	42.4633	190.127	34.25	5.34	16.7567		6.88		2.51		2.14	0.286	22.47	3.54	145.717	124.187	23.7067
Prelević et al. (2008)	Circum-Mediterranean	03A02	55.32	1.02	12.18	5.82	0.09	7.96	5.49	1.24	6.61	0.84	1.45	98.166	37.3758	24.5296	144.625	778.709	387.005	402.367	573.79	22.5442	425.737	35.0658	22.6517	2051.82	78.2142	207.431	27.1062	119.981	22.0354	3.5925	11.6117		5.46333		2.05208		1.695	0.236917	11.9842	2.3225	88	99.5721	21.0825
Prelević et al. (2008)	Circum-Mediterranean	03B02	57.9	1.46	10.94	5.92	0.11	8.64	2.76	0.93	8.52	0.75	1.28	99.328	38.5733	17.89	99.0467	604.417	360.86	659.95	471.297	30.1167	992.387	56.9433	19.5567	1571.53	95.1967	258.597	36.0867	159.813	29.6333	4.60667	15.31		7.00667		2.76		2.41667	0.351	27.5967	3.92	51	130.023	8.53
Prelević et al. (2008)	Circum-Mediterranean	03CS01	55.03	1.66	9.16	5.32	0.07	11.86	2.74	0.39	9.48	1.07	2.4	99.364	48.09	16.3733	94.2833	647.39	590.21	769.437	528.213	23.9633	902.253	54.62	39.7833	1868.14	90.7367	268.123	37.3233	170.303	31.47	4.77	15.9033		6.33667		2.11333		1.65333	0.239667	25.63	3.75667	65	112.663	28.2667
Prelević et al. (2008)	Circum-Mediterranean	03CS02	53.99	1.61	9.02	5.68	0.08	12.66	3.14	0.38	8.9	1.13	2.16	98.933	33.3667	14.2067	71.4167	566.983	472.307	493.783	687.637	21.91	638.17	38.8767	18.5967	1163.13	90.6933	235.497	31.91	146.33	27.72	4.44	12.75		5.34		1.94667		1.64667	0.208	17.4067	2.09233		92.9033	11.3233
Prelević et al. (2008)	Circum-Mediterranean	03CS03	54.3	1.64	9.12	5.71	0.08	12.26	3.19	0.44	8.86	1.12	2.36	99.259
Prelević et al. (2008)	Circum-Mediterranean	03FC01	56.19	1.33	11.14	5.9	0.09	9.55	2.99	1.2	6.42	0.86	3.62	99.407	48.475	16.22	113.228	625.102	438.11	633.12	498.2	25.9025	596.235	39.5725	26.4633	1458.12	70.3525	199.248	26.1675	117.025	22.5025	3.695	12.145		6.0375		2.4025		2.095	0.306	16.35	2.435	64.32	80.885	20.5625
Prelević et al. (2008)	Circum-Mediterranean	03FC02	55.93	1.36	10.67	5.82	0.08	10.21	2.49	1.71	5.91	0.85	5.14	100.321	33.8167	16.6733	94.5133	545.103	449.93	635.797	454.167	25.75	694.43	37.6967	29.72	1371.78	72.6833	184.63	25.79	121.25	23.93	3.81333	12.1967		5.82333		2.39667		2.05	0.308	19.36	2.16333	65	88.9667	20.9967
Prelević et al. (2008)	Circum-Mediterranean	03FC04	55.21	1.41	11.35	5.54	0.08	8.51	3.19	1.04	8.2	0.9	3.89	99.455	47.3325	16.825	134.305	739.165	490.033	735.888	558.215	26.33	626.955	44.605	28.995	1916.94	73.0875	209.04	27.61	123.15	23.245	3.7825	12.525		6.165		2.445		2.25	0.309	17.68	2.69		77.15	24.485
Prelević et al. (2008)	Circum-Mediterranean	03FC05	55.68	1.38	10.99	5.83	0.07	9.12	2.89	0.97	7.39	0.87	3.92	99.244	38.515	15.9175	99.0875	563.835	389.97	675.795	536.6	27.135	653.49	41.7375	22.9425	1497.42	66.8425	181.265	25.96	120.815	23.3925	3.68	12.745		6.325		2.5575		2.237	0.322	18.1175	2.7975		85.4125	20.88
Prelević et al. (2008)	Circum-Mediterranean	03FC05	55.36	1.36	10.93	5.76	0.07	9.03	2.87	0.97	7.35	0.86	3.92	98.633	42.225	15.0025	96.195	512.13	396.058	656.602	526.695	25.4025	625.665	39.975	21.8475	1546.55	64.7125	175.315	24.6	111.7	21.6	3.45	11.785		5.93		2.365		2.1	0.29175	17.53	2.62		79.735	19.7475
Prelević et al. (2008)	Circum-Mediterranean	03FC06	56.25	1.32	11.32	5.7	0.1	8.88	2.93	1.08	6.89	0.83	5.38	100.793	59.6975	17.2875	124.37	693.84	459.54	596.37	482.137	26.855	620.61	42.3375	18.635	1394.87	73.39	207.952	27.275	121.812	23.18	3.5975	12.4675		6.215		2.5175		2.27825	0.3315	17.125	2.555		83.6425	23.395
Prelević et al. (2008)	Circum-Mediterranean	03FD01	56.28	1.4	11.64	5.27	0.08	6.88	3.15	1.97	5.97	0.98	5.93	99.627	80.53	17.2967	106.073	465.7	155.363	375.017	603.007	24.29	651.653	41.1767	18.05	1354.65	68.97	201.353	28.4833	132.54	24.83	3.84667	13.1467		5.87		2.21667		1.97333	0.279	18.04	2.56667	57	96.96	23.8367
Prelević et al. (2008)	Circum-Mediterranean	03FD02	56.25	1.41	11.94	5.35	0.07	6.37	3.05	2.08	5.59	0.96	6.42	99.58
Prelević et al. (2008)	Circum-Mediterranean	03J01	48.14	1.24	8.37	5.97	0.12	13.31	9.14	0.54	6.78	1.55	3.34	98.721	24.015	18.0425	235.74	785.997	688.758	327.55	1522.56	30.835	630.365	48.275	7.19	3773.45	117.515	290.51	39.48	172.56	31.6475	5.2325	16.515		7.52		2.66		2.12275	0.2985	17.235	3.1125		109.953	119.338
Prelević et al. (2008)	Circum-Mediterranean	03J02	48.58	1.26	8.21	6.34	0.1	14.1	7.36	1.18	6.6	1.57	3.32	98.812	26.8525	16.7325	81.025	744.28	568.06	172.067	1108.82	30.2675	648.93	46.97	200.04	2772.61	99.46	241.403	33.9625	151.08	28.57	4.6625	15.77		7.275		2.7075		2.1975	0.29725	18.1075	3.145		118.832	29.175
Prelević et al. (2008)	Circum-Mediterranean	03J03	46.42	1.24	7.37	6.58	0.11	16.46	8.07	1.41	4.61	1.98	4.19	98.655	40.05	19.565	93.205	777.097	663.545	115.028	1570.87	37.01	721.19	62.2075	63.76	3305.39	143.315	351.535	47.915	211.16	38.775	6.39	20.97		9.0225		3.1975		2.5325	0.3485	19.7475	3.9125		155.945	31.7825
Prelević et al. (2008)	Circum-Mediterranean	03J06	46.99	1.25	7.88	6.45	0.12	14.04	8.43	2.03	4.43	1.49	5.73	99.061	38.245	18.0875	98.1975	778.86	657.357	157.23	1185.21	31.135	646.543	56.0575	141.637	3216.92	116.123	298.413	40.475	178.528	32.9525	5.435	17.1175		7.6875		2.715		2.17725	0.306	17.775	3.375		126.558	28.0275
Prelević et al. (2008)	Circum-Mediterranean	03J10	50.82	1.26	10.04	5.02	0.07	10.24	3.1	1.41	6.06	0.66	10.42	99.24
Prelević et al. (2008)	Circum-Mediterranean	03J10	46.2	1.23	7.32	6.65	0.12	16.66	7.77	1.06	4.91	2.1	4.15	98.378	57.7467	21.3567	97.7867	668.33	675.497	228.37	1593.48	36.9067	708.347	66.7833	11.2767	4334.12	143.49	361.057	48.8467	213.733	38.5267	6.32667	20.7767		9.13667		3.21		2.50333	0.342333	19.1067	3.95333	126.223	159.697	34.4567
Prelević et al. (2008)	Circum-Mediterranean	03S02	55.35	1.61	9.19	4.97	0.06	8.93	4.05	0.99	7.52	1.13	5.47	99.421	22.945	13.5125	66.1325	428.007	336.83	404.457	570.822	25.975	886.148	55.395	27.38	1825.38	87.7625	239.915	34.31	156.692	30.2875	5.0475	15.335		6.5		2.251		1.857	0.242	25.095	3.895	79	132.727	26.7525
Prelević et al. (2008)	Circum-Mediterranean	03S03	54.26	1.57	9.19	4.73	0.06	7.96	5.45	0.94	7.79	1.09	5.99	99.169	31.965	15.195	80.6375	525.665	443.993	456.433	731.845	28.24	984.872	63.47	27.48	4187.24	95.755	269.455	38.9825	177.173	34.2175	5.3575	16.935		7.095		2.445		1.96725	0.2735	27.795	4.4175		145.752	36.7825
Prelević et al. (2008)	Circum-Mediterranean	03V11	52.08	1.3	10.34	4.93	0.07	8.36	3.96	2.16	4.8	0.67	9.74	98.553	63.4	14.5575	88.005	637.02	389.043	399.848	432.65	19.915	570.325	37.16	43.6375	1296.27	87.23	235.955	32.375	140.657	24.885	3.8425	12.0625		4.8475		1.7585		1.4945	0.21175	15.92	2.59175		76.9225	18.4075
Prelević et al. (2008)	Circum-Mediterranean	03V16	50.71	1.24	9.86	5.08	0.07	10.81	3.14	1.75	5.32	0.65	10.93	99.701	67.54	16.3867	88.6533	601.087	484.3	392.263	405.087	19.77	629.97	35.63	33.9	1181.74	88.5933	226.64	30.0767	134.713	24.7067	4.01667	11.5967		4.69		1.78467		1.52833	0.218667	17.3067	2.19333	59	80.5667	18.59
Prelević et al. (2012)	Anatolia	05BSS02	49.22	1.75	10.5	6.84	0.11	10.06	8.04	2.18	7.17	1.4	1.32	98.7217	8.0625	19.06	117.892	510	404	261.252	1982.44	25.9475	806.247	166.475		2072.74	138.412	243.857	25.86	93.7025	13.5975	3.545	9.2025		5.6825		2.545		2.12	0.30375	18.5675	9.4	14	22.645	6.115
Prelević et al. (2012)	Anatolia	05BSS03	48.95	1.75	10.52	6.97	0.11	10.23	8.12	2.34	7.02	1.61	1.37	99.1217	6.6425	18.4875	92.405	514	431	167.715	2148.21	24.8325	753.06	143.107		2145.63	123.188	220.257	23.59	85.77	12.8625	3.4075	8.56		5.375		2.3775		2.065	0.298	17.5225	7.9975	15	20.6925	5.2125
Prelević et al. (2012)	Anatolia	05BSS04	48.7	1.6	10.68	6.98	0.11	10.78	8.19	1.94	4.96	1.79	2.9	98.7722	7.4825	12.405	62.1575	570	455	118.433	1276.17	18.1175	526.653	67.2575		1602.43	73.925	123.517	13.7975	51.3725	7.855	1.9305	5.53		3.7525		1.7925		1.5875	0.252	13.0375	3.68	21	14.5425	3.0275
Prelević et al. (2012)	Anatolia	05GUE01	52.81	1.43	11.01	6.95	0.12	7.02	7.5	1.39	5.79	0.57	5.25	99.9769	29.0625	22.8925	137.655	666	261	281.355	520.085	22.4825	582.903	37.685		267.58	60.4975	146.64	18.95	74.105	10.81	2.04525	6.94		4.8225		2.1675		1.9025	0.2765	16.65	2.59	10	28.3075	5.555
Prelević et al. (2012)	Anatolia	05GUE03	50	1.39	10.81	7.18	0.12	6.82	5.46	1.51	5.44	0.54	10.67	100.066	29.5833	22.1267	127.083	634	260	255.643	442.217	21.8067	532.633	34.2967		374.107	55.7133	130.993	16.93	66.3267	9.88	1.876	6.57		4.46667		2.13		1.9	0.268	15.25	2.268	12	25.2533	4.45333
Prelević et al. (2012)	Anatolia	05IL02	49.74	0.96	9.02	6.74	0.12	7.68	10.1	1.44	7.19	1.42	2.03	96.5686	28.1467	36.0467	235.593	170	83.4767	235.843	1758.38	35.3833	544.83	50.9267		5026.16	63.4967	118.527	26.47	65.2633	20.6567	7.93333	16.6367		11.7967		7.27333		6.47667	1.54333	28.9933	6.54667	48	48.23	17.6333
Prelević et al. (2012)	Anatolia	05IS01	54.28	1.48	10.28	6.43	0.08	9.13	5.12	1.47	6.86	1.16	3.12	99.5363	30.5567	20.7467	135.06	581	272.367	253.86	901.533	26.29	697.567	44.31		1852.99	49.12	112.187	11.9367	54.9	9.17667	2.00667	7.14667		4.92333		2.04		1.95667	0.263333	16.1767	1.96667	14	12.0367	4.24333
Prelević et al. (2012)	Anatolia	06BSS14	48.37	1.9	8.57	7.04	0.1	12.75	8.17	1.79	7.94	1.82	1.32	99.926	8.2825	16.7625	95.615	561	432	205.465	1650.83	21.57	939.16	197.002		1494.17	139.625	251.5	27.9575	104.45	15.2675	3.9225	9.505		5.0075		1.9225		1.515	0.224	21.9275	11.3875	11	21.11	6.6175
Prelević et al. (2012)	Anatolia	06BSS17	46.9	1.67	9.27	7.13	0.11	12.72	8.94	2.11	6.38	1.8	2.14	99.3267	8.535	18.7375	115.565	631.315	575.352	180.335	2036.37	23.0325	836.32	185.928		3602.95	150.685	266.715	28.955	107.358	15.66	3.9925	9.8725		5.4725		2.1675		1.7025	0.247	19.7675	10.1125	14	23.805	6.58
Prelević et al. (2012)	Anatolia	06KD21	54.97	1.24	11.06	6.57	0.09	6.26	8.41	1.86	6.77	1.37	1.25	99.9102	10.7467	34.0667	170.03	327	72	307.613	1193.41	33.9533	479.35	23.0133		2284.03	74.75	146.157	19.07	81.59	14.73	3.17333	10.86		7.05667		3.25333		2.86333	0.402667	12.57	1.45133	25	33.36	6.37667
Conticelli (1998)	Circum-Mediterranean	VS 28	56.04	1.27	13.91	5.91333	0.09	8.72	4.94	1.13	7.49	0.53	0.47	100.503	44.9	15.4	120.8	596	335.6	483.5	648.2	23.2	511.7	33.2	35.2	1192.7	89.09	226.5	26.69	107.56	17.2	3.02	9.49		5.24		2.16		1.89	0.27	14.09	2.01	69	51.9	13.6
Conticelli (1998)	Circum-Mediterranean	VS 29	55.47	1.36	13.39	6.42444	0.1	9.36	4.7	1.18	7.46	0.54	0.58	100.564	39	17	122	520	310	399	579	26.6	532	28.5	35.5	1390	110	249	31.1	120	20	3.8	12.9	1.44	6.33	1.07	2.81	0.384	2.31	0.318	15.7	2.47	53	50.4	10.7
Conticelli (1998)	Circum-Mediterranean	VS 70	56.81	1.28	14.36	5.96555	0.09	8.36	4.48	1.21	7.05	0.52	0.42	100.546	34	17.2	127	626	291	419	660	34	642	36	21	1195	100	241		123	19.7	3.45		1.36					2.8	0.35	16.5	2.2	50	60	14
Conticelli (1998)	Circum-Mediterranean	VS 75e	56.79	1.26	14.25	6.04333	0.08	8.52	4.57	0.95	6.96	0.52	0.59	100.533				551	288	388	686	37	584	34		1165	92	225
Conticelli (1998)	Circum-Mediterranean	VS 75m	56.8	1.25	14.16	5.88333	0.08	8.85	4.39	0.97	6.95	0.54	0.65	100.523				535	286	384	671	40	591	35		1150	89	230
Conticelli (1998)	Circum-Mediterranean	VS 76	48.47	2.4	11.95	8.54777	0.11	15.75	5.47	0.33	6.7	0.58	0.27	100.578	30	15	169	1983	1379	454	399	22	353	16		990	58.7	131		69	14.4	2.12		0.69					1.4	0.16	7.7	0.95925	28.5	29.9	7.1
Conticelli (1998)	Circum-Mediterranean	VS 90	56.62	1.24	14.58	5.90888	0.08	8.42	4.48	0.99	7.16	0.56	0.53	100.569			119	605	303	425	674	34	606	33		1250	95	251
Conticelli (1998)	Circum-Mediterranean	VS 91	56.69	1.23	14.39	5.83666	0.09	8.01	5.13	1.01	7.07	0.49	0.59	100.537			123	672	299	430	604	32	537	32		1221	97	240
Conticelli (1998)	Circum-Mediterranean	VS29	55.5	1.36	13.4	6.368	0.1	9.36	4.7	1.18	7.46	0.54			44.855	15.4375	120.823	596.345	335.55	483.505	648.24	23.2275	511.702	33.1725	35.2075	1192.69	89.0925	226.498	26.69	107.56	17.2025	3.015	9.4925		5.235		2.1575		1.88925	0.265	14.085	2.01475	68.9525	51.9175	13.615
Conticelli et al (2002)	Circum-Mediterranean	VS 189	49.86	0.61	15.39	6.64111	0.15	9.93	10.4	1.86	4.47	0.3	0.91	100.521		26.3	201.5	476	179.9	266.3	1085	22.3	224.5	14.8	27	824.3	83	156		52	10.9	2.1		1					2.1	0.36	5.2	0.91	62.8	48.44	12.65
Conticelli et al. (1992)	Circum-Mediterranean	MVC101	56.51	1.3	12.05	6.71	0.08	7.51	3.64	1.24	7.76	1.25	2.26	100.31					153	750	414	30	520	35		1220	74	175
Conticelli et al. (1992)	Circum-Mediterranean	MVC108	56.69	1.42	12.15	6.90333	0.09	7.25	3.54	1.28	7.72	1.2	2.08	100.323					153	747	432	32	508	33		1230	61	168
Conticelli et al. (1992)	Circum-Mediterranean	MVC10a	56.63	1.52	12.27	6.74555	0.07	7.71	3.55	1.3	7.84	1.18	1.55	100.366		20	124	420	152	776	461	38	519	32	15.3	1184	77	194		102	24.9	3.41		1.08					2.05	0.32	14.4	1.9	20	109	23.6
Conticelli et al. (1992)	Circum-Mediterranean	MVC122a	55.88	1.52	12.23	6.98889	0.09	7.48	3.29	1	7.83	1.32	2.66	100.289		19.9	121	425	159	712	434	31	521	35		1250	83	215		131	23	3.72		1.4					1.88	0.29	14	2		116
Conticelli et al. (1992)	Circum-Mediterranean	MVC126	56.92	1.2	12.41	6.26333	0.08	7.27	3.44	1.05	7.76	1.13	2.45	99.9733	48.1	17.4	116.1	373.6	128.2	599.8	314.6	19.6	344.4	26.2	9.3	918.7	53.71	125.27	21.45	99.59	17.7	2.75	8.73		4.32		1.77		1.58	0.22	9.49	1.41	38.7	78.6	17.1
Conticelli et al. (1992)	Circum-Mediterranean	MVC131	55.29	1.11	10.6	4.08889	0.06	11.78	6.9	0.82	7.17	1.12	1.43	100.369					427	371	245	31	527	35		780	46	127
Conticelli et al. (1992)	Circum-Mediterranean	MVC132	55.78	1.2	10.83	3.68889	0.06	11.34	6.29	0.83	7.55	1.19	1.48	100.239					349	580	236	32	513	35		960	61	164
Conticelli et al. (1992)	Circum-Mediterranean	MVC134a	56.34	1.44	12.28	6.42666	0.08	7.42	3.34	1.13	7.79	1.16	2.86	100.267					142	731	437	35	522	36		1190	66	185
Conticelli et al. (1992)	Circum-Mediterranean	MVC149	58.02	1.33	11.74	6.28222	0.07	7.45	2.99	1.35	7.54	1.1	2.4	100.272					141	742	388	33	487	26		1160	74	161
Conticelli et al. (1992)	Circum-Mediterranean	MVC150	56.73	1.21	11.17	6.53111	0.07	9.57	2.92	1.03	7.13	1.05	2.96	100.371					339	684	364	32	475	25		1070	75	169
Conticelli et al. (1992)	Circum-Mediterranean	ORC 01	57.79	1.51	11.79	5.70666	0.08	8.23	3.46	1.31	8.06	0.85	1.55	100.337	30	18.5	116	500	280	612	577	23.8	749	39	25.2	1400	148	352	47.4	193	26.9	4.32	14.4	1.27	5.23	0.89	2.42	0.322	1.85	0.248	21.4	2.93	30	119	14.9
Conticelli et al. (1992)	Circum-Mediterranean	ORC 02	58.43	1.49	11.46	5.57889	0.08	7.96	3.56	1.4	7.96	0.77	1.61	100.299					284	453	635	29	796	45		1200	142	320
Conticelli et al. (1992)	Circum-Mediterranean	ORC 04	58.01	1.5	11.7	5.70111	0.09	8.27	3.53	1.44	7.95	0.79	1.36	100.341	41.2	14.9	101	453.9	280	650.6	521.8	17.7	887	36	21.6	1003	103.36	284.49	35.13	146.36	20.46	2.99	8.73		3.98		1.6		1.42	0.2	16.17	1.98	36.2	87.6	16.7
Conticelli et al. (1992)	Circum-Mediterranean	ORC 21	59.51	1.5	11.26	5.47778	0.06	7.14	3.48	1.22	7.53	0.71	2.34	100.228					238	576	541	26	842	45		1140	144	331
Conticelli et al. (1992)	Circum-Mediterranean	ORC1	57.79	1.51	11.79	5.672	0.08	8.23	3.46	1.31	8.06	0.85			41.2025	14.93	101.358	453.923	280.027	650.575	521.817	17.6525	569.15	35.95	21.56	1002.97	103.362	284.485	35.1275	146.357	20.4625	2.9925	8.725		3.9825		1.60375		1.424	0.20275	16.165	1.9775	36.1725	87.5825	16.7375
Conticelli et al. (2011)	Circum-Mediterranean	VS 114	55.78	0.99	15.07	5.87556	0.1	9.09	6.12	1.78	4.65	0.28	0.42	100.156	45	23.2	145	483	202	369	366	24	420	21.8	20	713	69.996	151.008	19.3376	80.02	13.6926	2.208	6.2499	0.9588	5.0964	1.0147	2.73	0.3432	1.8	0.2992	10.7	1.62	39	48.8	8.89
Conticelli et al. (2011)	Circum-Mediterranean	VS 117	55.93	1.02	15.26	5.78666	0.1	8.59	6.2	1.62	4.75	0.28	0.66	100.197	35	21.9		485	217	371	373	26	426	22	24	746	69.003	157.96	19.4432	78	13.1949	2.139	6.7479	1.0152	5.208	0.9928	2.73	0.3564	1.86	0.2822	10.4	1.51	44	48	9.48
Conticelli et al. (2011)	Circum-Mediterranean	VS 153	55.45	1	15.76	6.07555	0.1	8.5	6.12	1.55	4.65	0.27	0.69	100.166	41	21	139	471	213	351	366	27	422	21		691																	38	42
Conticelli et al. (2011)	Circum-Mediterranean	VS 154	55.79	1.1	14.99	6.46	0.11	9.36	5.43	1.57	4.63	0.28	0.38	100.1	31	22.7	138	496	191	355	362	27	395	20		809																	33	38
Conticelli et al. (2011)	Circum-Mediterranean	VS 182	56.27	1.11	15.25	5.65555	0.1	8.85	5.82	1.56	4.83	0.3	0.66	100.406	39	20.7	135	481	224	369	379	26	443	23.2	19.5	831	75.999	165	19.5888	82.02	15.0954	2.3596	6.0427	1.0502	4.952	1.01534	2.5108	0.34026	1.76	0.3046	11.4	1.7	49	52.6	10
Conticelli et al. (2011)	Circum-Mediterranean	VS 67	47.46	0.67	14.17	7.77111	0.14	9.13	13.78	1.4	5.07	0.33	0.73	100.651	16	38.1		516	125	353	916	28	203	9	22	550	59	134		63	11.8	2.41		1					1.93	0.38	5	0.55	35.3	28.9	5.64
Gasperini et al. (2002)	Circum-Mediterranean	VS 224	49.43	0.61	15.9	6.84666	0.13	10.28	10.17	1.76	4.35	0.34	0.74	100.557			195.42			273.38	1106.08	25.61	248.37	16.05	15.41	773.26	74.16	142.94	16.21	62.2	10	2.23	7.38	0.98	5	0.87	2.31	0.32	2.02	0.32	5.35	0.8733	59.57	52.034	11.909
Peccerillo et al. (1988)	Circum-Mediterranean	OR 04	57.69	1.43	11.18	5.41	0.08	8.2	3.64	1.5	7.42	0.75	2.67	99.97			97	442	297	445	649	29	787	40		1177	141	309																120
Peccerillo et al. (1988)	Circum-Mediterranean	OR 07	57.61	1.43	11.51	5.33889	0.08	8.95	0.154167	1.32	7.82	0.69	2.17	97.0731			96	449	300	536	628	30	796	41		1198	145	319																119
Peccerillo et al. (1988)	Circum-Mediterranean	OR 10	58.11	1.43	11.18	5.42889	0.08	8.78	3.6	1.56	7.43	0.7	2.07	100.369		15	97	455	307	449	646	29	787	41		1175	149	315			29	3.3		1.1					1.9		18	2.6		109
Peccerillo et al. (1988)	Circum-Mediterranean	OR 12	58.11	1.42	11.82	5.27555	0.07	8.7	3.56	1.35	7.92	0.69	1.46	100.376		17	100	449	274	609	613	32	797	41	18	1224	139.1	338		178	25.88	3.8		1.21		0.85		0.31	1.64	0.23	18.9	2.81	41	121	17.8
Peccerillo et al. (1988)	Circum-Mediterranean	OR 21	57.18	1.42	11.15	5.29	0.08	8.2	4.4	1.34	7.84	0.69	2.66	100.25			98	463	299	597	641	30	777	40		1185	143	321																118
Peccerillo et al. (1988)	Circum-Mediterranean	OR 2E	56.74	1.42	11.25	5.24444	0.08	8.29	4.4	1.36	7.68	0.7	3.16	100.324			98	439	292	591	638	30	764	40		1154	143	310																115
Conticelli et al. (2009)	Western Alps	MEC 242	49.3	1.05	11.3	6.74111	0.1	13.6	7.65	1.6	5.94	1.1	2.3	100.17	32	30.81	149.04	922.2	302.778	378.531	825.496	28.8421	462.897	36.06	10.8081	3950.5	86.6667	219.121	31.5026	141.509	29.0188	4.81675	17.1429	1.60825	6.23018	0.971341	2.35897	0.286299	1.68205	0.243215	11.2675	2.38	28.3225	134.993	23.0563
Conticelli et al. (2009)	Western Alps	MEC 247	56	1.24	11	5.15444	0.09	9.27	3.11	1.29	9.07	1.09	1.8	99.1144	42	16.57	95.01	571.045	259.861	645.892	550.026	28.9182	638.003	36.365	13.1646	3533.5	97.6203	255.959	36.7792	168.156	34.0136	5.23885	18.7212	1.76744	6.60513	0.995382	2.34447	0.277806	1.58355	0.223967	16.575	2.28	132	135.37	24.1935
Conticelli et al. (2009)	Western Alps	VDA 03	55.1	1.312	10.2	4.68	0.081	8.94	4.02	1.13	9.24	1.13	3.53	99.363	93.04	13	83	470	280	555	799	30.8	665	34.4	28.4	3797	106	260	37.1	169	33.6	5.88	19	1.85	7.29	1.18	2.77	0.343	1.93	0.251	18.1	2.73	105	134	22.4
Conticelli et al. (2009)	Western Alps	VDA 15	48.77	1.188	10.94	7.1	0.115	11.34	7.78	1.41	6.47	1.33	2.04	98.483	41.165	29	181	560	270	321	756	31.9	472	28.3	10.4	4213	107	256	35.7	159	32.4	6.07	18.8	2	7.67	1.21	2.97	0.384	2.19	0.281	13	1.97	34	127	22.6
Conticelli et al. (2009)	Western Alps	VDA 17	50.29	1.154	10.24	6.95	0.123	11.52	6.64	0.85	7.39	1.27	2.75	99.177	40.5575	25	155	640	300	395	829	31.7	593	34.1	17.1	4293	117	273	38.2	174	34.2	6.15	19.4	1.99	7.57	1.22	2.93	0.371	2.04	0.266	16.1	2.43	36	155	28.3
Owen (2008)	Western Alps	WA 102	50.21	1.18	11.45	6.79	0.119	11.88	7.18	0.7	7.18	1.29	2.1	100.079		24.1	143	656	309	430	530	30	371	27.8	12.4	3470	70.2	159	21.5	95.8	22.8	4.25	15.8	1.66	5.73	1	2.66	0.354	2.15	0.27	9.2	1.75	94	81.9	15.2
Owen (2008)	Western Alps	WA 104	52.3	1.25	11.12	6.04	0.117	8.77	5.29	1.13	9.21	1.43	1.59	98.247		17.1	112	455	290	506	870	40	681	42.8	8.6	4740	127	298	39.3	172	39.4	7.14	26.9	2.52	9.68	1.31	3.56	0.458	2.7	0.321	5	2.35	79	189	23.4
Owen (2008)	Western Alps	WA 105	50.38	1.122	11.74	6.77	0.108	10.87	7.35	1.4	6.58	1.1	1.9	99.32		28.9	159	594	246	328	910	29	451	31	8.4	4240	114	264	35.4	155	32.8	5.68	20.7	1.75	6.78	0.95	2.66	0.344	2.1	0.245	11.6	1.69	54	150	20.7
Owen (2008)	Western Alps	WA 106	43.69	1.036	8.56	7.5	0.125	13.11	7.57	0.92	5.35	1.56	9.46	98.881		33.2	163	665	326	292	680	24	236	16.2	22.1	3250	53.9	121	16	70.7	16	3.43	12.5	1.3	5.31	0.82	2.2	0.284	1.71	0.212	6.6	0.83	40	45.8	10.4
Peccerillo & Martinotti (2006)	Western Alps	WA 05 av-b	50.64	1.17	11.98	6.81444	0.13	11.15	6.92	0.7	7.36	1.14	2.25	100.254		24	156	630	281	436	570	28	399	29	10.7	3494	66.15	152	20.3	92	21.4	3.88	14.05	1.5	6.67	1.02	2.61	0.35	2.19	0.28	10.1	1.68	91	83.5	17.6
Peccerillo & Martinotti (2006)	Western Alps	WA 05 av-d	53.83	1.28	11.61	6.35	0.13	8.82	4.98	1.1	9.35	1.32	1.4	100.17		19	120	498	299	496	853	37	684	41	7.5	4648	111	261	35.7	162	36.7	6.2	23.45	2.31	9.64	1.38	3.45	0.44	2.7	0.34	12	2.33	85.5	183.5	22.2
Note: All the collect data have MgO > 6 wt% to represent near-primary mantle-derived melts
References
Avanzinelli, R., Elliott, T., Tommasini, S., & Conticelli, S. (2008). Constraints on the genesis of potassium-rich Italian volcanic rocks from U/Th disequilibrium. Journal of Petrology, 49(2), 195-223.
Boari, E., Avanzinelli, R., Melluso, L., Giordano, G., Mattei, M., De Benedetti, A. A., Morra, V., & Conticelli, S. (2009a). Isotope geochemistry (Sr–Nd–Pb) and petrogenesis of leucite-bearing volcanic rocks from “Colli Albani” volcano, Roman Magmatic Province, Central Italy: inferences on volcano evolution and magma genesis. Bulletin of Volcanology, 71(9), 977-1005.
Boari, E., Tommasini, S., Laurenzi, M. A., & Conticelli, S. (2009b). Transition from ultrapotassic kamafugitic to sub-alkaline magmas: Sr, Nd, and Pb isotope, trace element and 40Ar–39Ar age data from the Middle Latin Valley volcanic field, Roman Magmatic Province, Central Italy. Journal of Petrology, 50(7), 1327-1357.
Caprarelli, G., Togashi, S., & De Vivo, B. (1993). Preliminary Sr and Nd isotopic data for recent lavas from Vesuvius volcano. Journal of volcanology and geothermal research, 58(1-4), 377-381.
Civetta, L., Del Carmine, P., Manetti, P., Peccerillo, A., & Poli, G. (1984). Petrology, geochemistry and Sr-isotope characteristics of lavas from the area of Commenda (Mts. Vulsini, Italy). Bulletin Volcanologique, 47(3), 581-595.
Conticelli, S., & Peccerillo, A. (1992). Petrology and geochemistry of potassic and ultrapotassic volcanism in central Italy: petrogenesis and inferences on the evolution of the mantle sources. Lithos, 28(3-6), 221-240.
Conticelli, S. (1998). The effect of crustal contamination on ultrapotassic magmas with lamproitic affinity: mineralogical, geochemical and isotope data from the Torre Alfina lavas and xenoliths, Central Italy. Chemical Geology, 149(1-2), 51-81.
Conticelli, S., D’antonio, M., Pinarelli, L., & Civetta, L. (2002). Source contamination and mantle heterogeneity in the genesis of Italian potassic and ultrapotassic volcanic rocks: Sr–Nd–Pb isotope data from Roman Province and Southern Tuscany. Mineralogy and Petrology, 74(2-4), 189-222.
Conticelli, S., Avanzinelli, R., Ammannati, E., & Casalini, M. (2015). The role of carbon from recycled sediments in the origin of ultrapotassic igneous rocks in the Central Mediterranean. Lithos, 232, 174-196.
Conticelli, S., Francalanci, L., Manetti, P., Peccerillo, A., & Santo, A. (1986). Caratteristiche composizionali dei prodotti dell'apparato di Latera (Monti Vulsini) e loro significato vulcanologico. Mere. Soc. Geol. Ital, 25, 715-726.
Conticelli, S., Manetti, P., & Menichetti, S. (1992). Petrology, chemistry, mineralogy and Sr-isotopic features of Pliocenic orendites from South Tuscany: implications on their genesis and evolutions. European Journal of Mineralogy, 4, 1359-1375.
Conticelli, S., Francalanci, L., Manetti, P., Cioni, R., & Sbrana, A. (1997). Petrology and geochemistry of the ultrapotassic rocks from the Sabatini Volcanic District, central Italy: the role of evolutionary processes in the genesis of variably enriched alkaline magmas. Journal of Volcanology and Geothermal Research, 75(1-2), 107-136.
Conticelli, S., Marchionni, S., Rosa, D., Giordano, G., Boari, E., & Avanzinelli, R. (2009). Shoshonite and sub-alkaline magmas from an ultrapotassic volcano: Sr–Nd–Pb isotope data on the Roccamonfina volcanic rocks, Roman Magmatic Province, Southern Italy. Contributions to Mineralogy and Petrology, 157(1), 41-63.
Conticelli, S., Guarnieri, L., Farinelli, A., Mattei, M., Avanzinelli, R., Bianchini, G., ... & Venturelli, G. (2009). Trace elements and Sr–Nd–Pb isotopes of K-rich, shoshonitic, and calc-alkaline magmatism of the Western Mediterranean Region: genesis of ultrapotassic to calc-alkaline magmatic associations in a post-collisional geodynamic setting. Lithos, 107(1-2), 68-92.
Conticelli, S., Avanzinelli, R., Marchionni, S., Tommasini, S., & Melluso, L. (2011). Sr-Nd-Pb isotopes from the Radicofani Volcano, Central Italy: constraints on heterogeneities in a veined mantle responsible for the shift from ultrapotassic shoshonite to basaltic andesite magmas in a post-collisional setting. Mineralogy and Petrology, 103(1-4), 123-148.
Di Battistini, G., Montanini, A., Vernia, L., Bargossi, G. M., & Castorina, F. (1998). Petrology and geochemistry of ultrapotassic rocks from the Montefiascone Volcanic Complex (Central Italy): magmatic evolution and petrogenesis. Lithos, 43(3), 169-195.
Gasperini, D., Blichert‐Toft, J., Bosch, D., Del Moro, A., Macera, P., & Albarede, F. (2002). Upwelling of deep mantle material through a plate window: evidence from the geochemistry of Italian basaltic volcanics. Journal of Geophysical Research: Solid Earth, 107(B12), ECV-7.
Giannetti, B., & Ellam, R. (1994). The primitive lavas of Roccamonfina volcano, Roman region, Italy: new constraints on melting processes and source mineralogy. Contributions to Mineralogy and Petrology, 116(1-2), 21-31.
Guo, Z., Wilson, M., Zhang, M., Cheng, Z., & Zhang, L. (2015). Post-collisional ultrapotassic mafic magmatism in South Tibet: Products of partial melting of pyroxenite in the mantle wedge induced by roll-back and delamination of the subducted Indian continental lithosphere slab. Journal of Petrology, 56(7), 1365-1406.
Joron, J. L., Metrich, N., Rosi, M., Santacroce, R., & Sbrana, A. (1987). Chemistry and petrography.
Owen, J. P. (2008). Geochemistry of lamprophyres from the Western Alps, Italy: implications for the origin of an enriched isotopic component in the Italian mantle. Contributions to Mineralogy and Petrology, 155(3), 341-362.
Peccerillo, A., & Martinotti, G. (2006). The Western Mediterranean lamproitic magmatism: origin and geodynamic significance. Terra Nova, 18(2), 109-117.
Peccerillo, A., Poli, G., & Serri, G. (1988). Petrogenesis of orenditic and kamafugitic rocks from Central Italy. The Canadian Mineralogist, 26(1), 45-65.
Perini, G., Francalanci, L., Davidson, J. P., & Conticelli, S. (2004). The petrogenesis of Vico Volcano, Central Italy: an example of low scale mantle heterogeneity. Journal of Petrology, 45, 139-182.
Prelević, D., Foley, S. F., Romer, R., & Conticelli, S. (2008). Mediterranean Tertiary lamproites derived from multiple source components in postcollisional geodynamics. Geochimica et Cosmochimica Acta, 72(8), 2125-2156.
Prelević, D., Akal, C., Foley, S. F., Romer, R. L., Stracke, A., & Van Den Bogaard, P. (2012). Ultrapotassic Mafic Rocks as Geochemical Proxies for Post-collisional Dynamics of Orogenic Lithospheric Mantle: the Case of Southwestern Anatolia, Turkey. Journal of Petrology, 53(5), 1019-1055.
Rogers, N. W., Hawkesworth, C. J., Parker, R. J., & Marsh, J. S. (1985). The geochemistry of potassic lavas from Vulsini, central Italy and implications for mantle enrichment processes beneath the Roman region. Contributions to Mineralogy and Petrology, 90(2-3), 244-257.
Zhao, Z., et al. (2009). Geochemical and Sr–Nd–Pb–O isotopic compositions of the post-collisional ultrapotassic magmatism in SW Tibet: Petrogenesis and implications for India intra-continental subduction beneath southern Tibet. Lithos, 113(1), 190-212.
Li, W., Yang, Z., Chiaradia, M., Zhou, L., Hou, Z., 2021. Enrichment Nature of Ultrapotassic Rocks in Southern Tibet Inherited from their Mantle Source. Journal of Petrology 62, egab060.
Li, X.-H., Zhou, H., Chung, S.-L., Lo, C.-H., Wei, G., Liu, Y., Lee, C.-y., 2002. Geochemical and Sr-Nd Isotopic Characteristics of Late Paleogene Ultrapotassic Magmatism in Southeastern Tibet. International Geology Review 44, 559-574.
Tian, S.-H., Yang, Z.-S., Hou, Z.-Q., Mo, X.-X., Hu, W.-J., Zhao, Y., Zhao, X.-Y., 2017. Subduction of the Indian lower crust beneath southern Tibet revealed by the post-collisional potassic and ultrapotassic rocks in SW Tibet. Gondwana Research 41, 29-50.
Liu, D., Zhao, Z., Zhu, D.-C., Niu, Y., DePaolo, D.J., Harrison, T.M., Mo, X., Dong, G., Zhou, S., Sun, C., Zhang, Z., Liu, J., 2014. Postcollisional potassic and ultrapotassic rocks in southern Tibet: Mantle and crustal origins in response to India–Asia collision and convergence. Geochimica et Cosmochimica Acta 143, 207-231.
Miller, C., Schuster, R., Klötzli, U., Frank, W., Purtscheller, F., 1999. Post-Collisional Potassic and Ultrapotassic Magmatism in SW Tibet: Geochemical and Sr–Nd–Pb–O Isotopic Constraints for Mantle Source Characteristics and Petrogenesis. Journal of Petrology 40, 1399-1424.
Guo, Z., Wilson, M., Liu, J., Mao, Q., 2006. Post-collisional, Potassic and Ultrapotassic Magmatism of the Northern Tibetan Plateau: Constraints on Characteristics of the Mantle Source, Geodynamic Setting and Uplift Mechanisms. Journal of Petrology 47, 1177-1220.
Cheng, Z., Guo, Z., 2017. Post-collisional ultrapotassic rocks and mantle xenoliths in the Sailipu volcanic field of Lhasa terrane, south Tibet: Petrological and geochemical constraints on mantle source and geodynamic setting. Gondwana Research 46, 17-42.
Wang, B., Chen, J., Xu, J., Wang, L., 2014. Geochemical and Sr–Nd–Pb–Os isotopic compositions of Miocene ultrapotassic rocks in southern Tibet: Petrogenesis and implications for the regional tectonic history. Lithos 208-209, 237-250.
Huang, F., Chen, J.-L., Xu, J.-F., Wang, B.-D., Li, J., 2015. Os–Nd–Sr isotopes in Miocene ultrapotassic rocks of southern Tibet: Partial melting of a pyroxenite-bearing lithospheric mantle? Geochimica et Cosmochimica Acta 163, 279-298.
